# Arctic phytoplankton spring bloom diversity across the marginal ice zone in Baffin Bay

Catherine G erikas Ribeiro <sup>1+\*</sup>

Adriana Lopes dos Santos <sup>2+</sup>

Nicole Trefault <sup>1</sup>

Dominique Marie <sup>3</sup>

Connie Lovejoy <sup>4</sup>

Daniel Vaultot <sup>3,2</sup>

<sup>1</sup> GEMA Center for Genomics, Ecology & Environment, Universidad Mayor, Camino La Pir mide, 5750, Huechuraba, Santiago, 8580745, Chile

<sup>2</sup> Asian School of the Environment, Nanyang Technological University, 50 Nanyang Avenue, Singapore, 639798, Singapore.

<sup>3</sup> Sorbonne Universit , CNRS, UMR7144, Team ECOMAP, Station Biologique de Roscoff, Roscoff, 29680, France

<sup>4</sup> D partement de Biologie, Institut de Biologie Int grative et des Syst mes, Universit  Laval, Quebec, QC G1R1V6, Canada

+ These two authors contributed equally to the paper

\* Corresponding author: [catherine.gerikas@gmail.com](mailto:catherine.gerikas@gmail.com)

Keywords: phytoplankton, microbial eukaryotes, Arctic Ocean, high throughput amplicon sequencing

Date: March 14, 2022

## 1 Abstract

2 Phytoplankton under-ice blooms have been recently recognized as an important Arctic phenomenon for global  
3 primary production and biogeochemical cycling. Drastic sea-ice decline in both extension and thickness enables  
4 the development of early blooms, sometimes hundreds of kilometers beneath the pack ice. Baffin Bay is a  
5 semi-enclosed sea where Arctic and North Atlantic water masses interact. It is totally covered by sea-ice by  
6 March and ice-free by August/September. In the present work, we investigated the phytoplankton community  
7 structure across the marginal ice zone between the ice-free, Atlantic-influenced, east and the ice-covered, Arctic-  
8 influenced, west Baffin Bay using 18S rRNA high-throughput amplicon sequencing, flow cytometry cell counting  
9 and numerous environmental and biological data collected and compiled in the scope of the Green Edge project.  
10 Sampling was performed during June-July 2016 in a total of 16 stations with around 6 depths each. Stations  
11 were clustered into “Under Ice” (UI), “Marginal Ice Zone” (MIZ) and “Open Water” (OW) on the basis of its sea  
12 ice cover upon sampling. Phytoplankton community structure was analyzed by 18S rRNA metabarcoding with  
13 the microdiversity approach. The UI sector was characterized by a shallow nitracline, high pico-phytoplankton  
14 abundance and a shared dominance between *Micromonas* and *Phaeocystis* in the 0.2-3  $\mu\text{m}$  size fraction, as well  
15 as an increased contribution of Cryptophyceae and non-diatom Ochrophyta in the 3-20  $\mu\text{m}$  size fraction. Several  
16 amplicon sequence variants (ASVs) were flagged as indicator for the UI+MIZ sector group, including known  
17 ice-associated taxa such as the diatoms *Melosira arctica* and *Pseudo-nitzschia seriata*, but also specific ASVs  
18 assigned to the green alga *Micromonas polaris* and the cryptophyte *Falcomonas daucoides*, the silicoflagellate  
19 *Dictyocha speculum*, one member of the uncultivated MOCH-2 group, and a *Pterosperma* sp. (green algae) rarely  
20 seen in other metabarcoding datasets, including from the Arctic. The OW sector harbored a community adapted  
21 to a nutrient-depleted/high light environment, with a significant contribution of the haptophyte *Phaeocystis*  
22 *pouchetii* and big centric diatoms, including several *Thalassiosira* species.

## 23 Introduction

24 The recognition of the occurrence of an annual under-ice bloom in the Arctic Ocean (Arrigo et al. 2012, 2014)  
25 represented a paradigm shift that has impacted the estimates of primary production (Kinney et al. 2020), as well  
26 as the understanding of the biogeochemical cycling in the region (Ardyna et al. 2020). The Arctic is undergoing  
27 drastic changes directly linked to sea-ice decline in both extension and thickness (Meredith et al. 2019; Serreze  
28 et al. 2007), enabling the early development of extensive under-ice blooms (Horvat et al. 2017). A recent model  
29 indicates that the photosynthetically active radiation (PAR) transmission through first and second-year sea ice  
30 can now sustain net phytoplankton growth over most of the Arctic by July (Ardyna et al. 2020). The periods  
31 when sea-ice is present have been shortened by earlier melting and delayed freezing seasons (Tedesco et al.  
32 2019), impacting also the timing of the characteristic ice-edge phytoplankton spring blooms (Janout et al. 2016;  
33 Perrette et al. 2011; Renaut et al. 2018), with cascading effects to higher trophic levels and nutrient fluxes (Leu  
34 et al. 2011; Post et al. 2013).

35 Autotrophic communities from high latitude environments are subjected to a light regime mainly dictated by  
36 the seasonally restricted input of solar energy, but also by the sea-ice extension/thickness and snowfall rates,  
37 which have a light-attenuating effect (Leu et al. 2015). The sea-ice also provides a complex habitat for the  
38 sympagic community (Niemi et al. 2011; Olsen et al. 2017), as well as seeding organisms to the water column  
39 during melting (Hardge et al. 2017). The presence of sea-ice and its associated community has been linked to  
40 higher abundance and better nutrition of pelagic organisms from higher trophic levels (Hop et al. 2011; Schmidt  
41 et al. 2018). The Arctic sea-ice harbors complex communities with many metabolic strategies, where different  
42 types of ice present different community structures (Comeau et al. 2013), and may act as a flagellate cyst  
43 repository, for example for dinoflagellates such as *Polarella glacialis* (Kauko et al. 2018). Sympagic assemblages  
44 have a great potential for the discovery of novel protist taxa (Hardge et al. 2017; Ribeiro et al. 2020). They  
45 are now facing an imminent threat due to rapid decline on ice extension: a drastic decrease in sympagic protist  
46 diversity has been reported in the Arctic due to the loss of multiyear sea ice, which harbors almost 40% more  
47 species than first-year ice (Hop et al. 2020). It is expected that Arctic increasing temperatures, enhanced water  
48 column stratification and ocean acidification will also favor specific pelagic populations, such as the pico-sized  
49 green alga *M. polaris* (Benner et al. 2019; Hoppe et al. 2018; Li et al. 2009).

50 Diatoms tend to dominate Arctic sympagic communities and under-ice blooms, especially pennate diatoms  
51 from the genera *Nitzschia*, *Fragilariopsis*, *Navicula* and *Cylindrotheca* (Ardyna et al. 2020; Hop et al. 2020; Leu  
52 et al. 2015), with also the dominance of *Nitzschia frigida* during polar winter (Niemi et al. 2011). As the snow  
53 melts during spring/summer, the formation of melt ponds creates a new habitat which might be connected  
54 with the water column below. Melt pond communities are often dominated by flagellates (Mundy et al. 2011),  
55 and mixo/heterotrophic groups including Chrysophyceae, Filosa-Thecofilosea, and ciliates (Xu et al. 2020).  
56 Bottom-ice communities are rich, characterized by the presence of pennate diatoms and the strand-forming

57 centric diatom *Melosira arctica* (Poulin et al. 2014). The seasonally retreating marginal ice zone is followed by  
58 massive phytoplankton blooms developing close to and below the ice edge (Perrette et al. 2011). The pelagic  
59 phytoplankton harbors a different diatom community from that of sea-ice (Oziel et al. 2019), with stronger  
60 presence of centric diatoms such as *Thalassiosira* and *Chaetoceros*, which are more adapted to lower nutrient  
61 concentrations and higher luminosity within the ice-free euphotic zone (Kvernvik et al. 2020; Morando and  
62 Capone 2018).

63 Apart from Bacillariophyta, other groups also play pivotal roles in the Arctic ecosystem. The Arctic pico-  
64 phytoplankton (0.2-2  $\mu\text{m}$ ) is dominated by the Mamiellophyceae *M. polaris*, *Bathycoccus prasinos* and *Man-*  
65 *toniella* spp. (Joli et al. 2017; Lovejoy et al. 2007; Not et al. 2005). *M. polaris* is often the most abundant  
66 (Balzano et al. 2012; Lovejoy and Potvin 2011) and is considered an Arctic sentinel species (Freyria et al. 2021)  
67 due to the close relationship of its distribution patterns with temperature (Demory et al. 2019). *Phaeocystis* is a  
68 globally distributed haptophyte genus, with a great impact on the carbon and sulfur exchange on the ocean/at-  
69 mosphere interface (Schoemann et al. 2005). The bloom-forming *P. pouchetii* has a pan-Arctic distribution  
70 (Lasternas and Agustí 2010), with blooms detected even under thick snow-covered pack ice (Assmy et al. 2017),  
71 and recently reported also in Antarctic waters (Trefault et al. 2021).

72 Among other perils to the Arctic ecosystem, the “atlantification” phenomena was first reported more than a  
73 decade ago (Hegseth and Sundfjord 2008), with hydrographic impacts on water column stratification and sea-ice  
74 decline due to increased heat fluxes from Atlantic Water (Polyakov et al. 2017), as well as biological impacts,  
75 via intrusion by advection of species of temperate origin (Neukermans et al. 2018; Oziel et al. 2020). Several  
76 studies also report a phytoplankton downsizing trend in warmer ocean waters (Hilligsøe et al. 2011; Morán et al.  
77 2010). For example, warm anomalies in the Atlantic Water inflow to the Arctic Ocean seems to shift plankton  
78 dominance from diatoms cells to small coccolithophores (Lalande et al. 2013; Smyth et al. 2004).

79 Baffin Bay is a seasonally ice-covered sea within the Canadian Arctic, with a complex interplay of the Atlantic  
80 and Arctic, Pacific-originated water masses (see Material & Methods section). The longitudinal physico-chemical  
81 gradient created by this system of water masses results in distinct stratification patterns (Randelhoff et al. 2019)  
82 and differential sea-ice melting rates (Tang et al. 2004), greatly impacting food web structure and carbon export  
83 (Saint-Béat et al. 2020), as well as the permeability of the sea-ice, influencing brine connectivity and nutrient  
84 availability to sympagic algae (Tedesco et al. 2019). Baffin Bay is especially susceptible to drastic environmental  
85 changes, with a reported increase of 20 days of the length of the melting season compared to four decades ago  
86 (Stroeve et al. 2014), due to ongoing changes such as warming on its eastern subsurface boundaries caused by  
87 Atlantic inflow, and freshening trends on its Arctic-influenced sectors (Zweng and Münchow 2006).

88 In the present work, we used high-throughput amplicon sequencing and a microdiversity approach to investi-  
89 gate how the plankton community structure changes across the marginal ice zone between the Atlantic-influenced  
90 east and Arctic-influenced west Baffin Bay. The present study provides important insights on the impact of  
91 sea-ice loss on ice-associated pelagic plankton.

## 92 **Material and Methods**

### 93 **Study area**

94 Baffin Bay is a seasonally ice-covered sea within the Canadian Arctic, delimited by Greenland in the west  
95 and by Baffin Island in the east, where complex interactions between North Atlantic and Arctic water masses  
96 take place. The temperate and salty West Greenland Current (WGC), product of the interaction of North  
97 Atlantic waters with the Irminger current, flows northward on eastern Baffin Bay along the Greenland coast,  
98 coming through the Davis Strait (Tang et al. 2004). Due to its higher density, the WGC cannot pass through  
99 the Canadian Archipelago and recirculates counter-clockwise, interacting with the colder, less-saline, Pacific-  
100 originated Arctic waters, flowing southward as the Baffin Island Current (BIC) (Jones et al. 2003; Münchow  
101 et al. 2015). Sea-ice formation starts in Baffin Bay during October and covers almost the totality of its area by  
102 March, followed by the melting season onset in April, as sea-ice retreats westward until it reaches a minimum  
103 extent by August/September (Tang et al. 2004). In the western Baffin Bay, the onset of snow cover melt  
104 modulates the termination of the sea-ice algal bloom and the beginning of the under-ice phytoplankton spring  
105 bloom, reaching similar magnitudes to its offshore counterparts (Oziel et al. 2019).

### 106 **Sampling & DNA extraction**

107 Samples were collected onboard the research icebreaker CCGS *Amundsen* on four longitudinal transects be-  
108 tween 68.4°N-70°N and 56.8°W-62.4°W, from 9 June to the 2nd July 2016, for a total of 16 sampling stations  
109 (Figure 1). Sea water was sampled at six depths within the euphotic layer at each station, using 12-L Niskin  
110 bottles attached to a rosette equipped with a Seabird SBE-911plus CTD unit (Sea-Bird Electronics, Bellevue,  
111 WA, USA). The list of the sensors attached to the rosette carousel can be found in Bruyant et al. (2022). Three  
112 liters of water from each sampling point were pre-filtered with a 100  $\mu\text{m}$  mesh and subsequently filtered with  
113 a peristaltic pump through the following sets of polycarbonate filters: 20  $\mu\text{m}$  (47 mm), 3  $\mu\text{m}$  (47 mm), and  
114 0.22  $\mu\text{m}$  (Sterivex™ filters). Filters were placed in cryotubes (except for the Sterivex™), preserved with 1.8  
115 mL of RNAlater™ and stored at -80°C until processing. DNA was extracted using ZR Fungal/Bacterial DNA  
116 MiniPrep (Zymo Research, Irvine, CA, USA) following instructions from the manufacturer, and its final con-  
117 centration was measured using PicoGreen™ (Thermo Fisher Scientific, Waltham, MA, USA) with a LabChip  
118 GX (Perkin-Elmer, Waltham, MA, USA).

### 119 **18S rRNA V4 PCR amplification and sequencing**

120 The V4 region of the 18S rRNA (about 380 bp) was amplified using the V4 primers TAReuk454FWD1 (forward)  
121 and V4 18S Next.Rev (reverse), along with the Illumina Nextera (Illumina, San Diego, CA, USA) 5' end overhang  
122 sequence as described in Piredda et al. (2017). Reaction mixtures in a total of 20  $\mu\text{L}$  were performed using  
123 10  $\mu\text{L}$  of Phusion High-Fidelity PCR Master Mix® 2 $\times$ , 0.3  $\mu\text{M}$  final concentration of each primer, 3% DMSO,

124 2% BSA and H<sub>2</sub>O. Thermal conditions were as follows: 98°C for 5 min, followed by 25 cycles of 98°C for 20  
125 s, 52°C for 30 s, 72°C for 90 s, and a final cycle of 72°C for 5 min. Samples were amplified in triplicates  
126 and pooled together subsequently in order to minimize the chance of amplification errors. PCR purification  
127 was performed using AMPure XP Beads (Beckman Coulter, Brea, CA, USA) following instructions from the  
128 manufacturer. DNA quantification and quality check was done using a LabChip GX Touch HT Nucleic Acid  
129 Analyzer (PerkinElmer, Waltham, MA, USA). Libraries were prepared as detailed on the Illumina® support  
130 website (<http://support.illumina.com>) with a final concentration of 1 nM and 1% of denaturated PhiX to prevent  
131 sequencing errors due to low-diversity libraries. Sequencing was performed using a 2×250 bp MiSeq Reagent  
132 Kit v2® at the GenoMer platform (Roscoff, France).

### 133 **Sequence processing**

134 Sequences were processed using the dada2 (Callahan et al. 2016) package within R (R Core Team 2021).  
135 Reads were filtered and trimmed using the filterAndTrim function with the following parameters: truncLen  
136 = c(250, 240), trimLeft equal to each primer length (for primer removal), maxN=0, maxEE=c(2, 2), and  
137 truncQ=10. Merging of forward and reverse reads with the mergePairs function and chimeric sequences removal  
138 with the removeBimeraDenovo function were both performed with default parameters. Resulting ASVs were  
139 taxonomically assigned using assignTaxonomy function with PR2 database (Guillou et al. 2013) version 4.14  
140 (<https://pr2-database.org/>). Samples with less than a total of 3,000 reads were excluded, and the number  
141 of reads for each sample was normalized by the median sequencing depth. Autotrophic taxa were selected  
142 by filtering-in divisions Chlorophyta, Cryptophyta, Haptophyta, Ochrophyta and Cercozoa. Classes known to  
143 comprise only heterotrophic members (Chrysophyceae, Sarcomonadea and Filosa-Thecofilosea) were excluded.  
144 Dinoflagellates were not considered because they contain both autotrophic and heterotrophic taxa, and the high  
145 number of 18S rRNA gene copies per genome makes them dominate read numbers, obscuring patterns of other  
146 autotrophs. Processing script can be found at [https://github.com/vaulot/Paper-2021-Vaulot-metapr2/tree/  
147 main/R\\_processing](https://github.com/vaulot/Paper-2021-Vaulot-metapr2/tree/main/R_processing).

### 148 **Environmental data**

149 Environmental variables obtained by other studies during the Green Edge cruise (Lafond et al. 2019; Randelhoff  
150 et al. 2019; Saint-Béat et al. 2020) were used here in accordance with our different sectors UI, MIZ and OW.  
151 All ancillary physico-chemical and biological data obtained from the Green Edge project used in the present  
152 paper is available at [http://www.obs-vlfr.fr/proof/php/GREENEDGE/x\\_datalist\\_1.php?xxop=greenedge&  
153 xxcamp=amundsen](http://www.obs-vlfr.fr/proof/php/GREENEDGE/x_datalist_1.php?xxop=greenedge&xxcamp=amundsen) as raw data, and at <https://www.seanoe.org/data/00487/59892/> (Massicotte et al. 2020)  
154 as formatted files, and described in detail by Bruyant et al. (2022) (see Data Availability section). The complete  
155 list of variables sampled during the Amundsen Green Edge cruise, the principal investigator responsible for each  
156 data set, and the protocols used to obtain and analyze physical, chemical and biological data can be found in  
157 Bruyant et al. (2022). Further information on nutrient and pigment analysis can be found in Lafond et al.

158 (2019). Data processing for light transmittance, sea-ice cover and water column stability can be found in  
159 Randelhoff et al. (2019).

## 160 Flow cytometry analysis

161 Autotrophic and heterotrophic cell abundance was measured *in situ* using a BD Accuri<sup>TM</sup> C6 flow cytometer  
162 as previously described in (Marie et al. 2010). Pico- and nano-phytoplankton abundance was measured on  
163 unstained samples with fluorescent beads for parameter normalization (0.95 G Fluoresbrite® Polysciences, War-  
164 rington, PA), while heterotrophic cell enumeration was performed using SYBR Green® staining as described in  
165 (Marie et al. 1997).

## 166 Data analysis

167 Sampling stations (Figure 1) were clustered into “Open Water” (OW), “Marginal Ice Zone” (MIZ) and “Under  
168 Ice” (UI) on the basis of the temporal dynamics sea ice cover using the parameter “Open Water Days” (OWD).  
169 OWD corresponds to how many days a given station had been ice-free before sampling (positive values) or  
170 how many days it took for it to become ice-free after sampling (negative values) (see Randelhoff et al. 2019).  
171 Stations with OWD > 10 days of open water before sampling day were considered OW, stations with 10 to -10  
172 days were considered within the MIZ, and stations with OWD < -10 days were considered UI (Table 1). The  
173 number of sampling points within each sector and size fractions can be found in Table 2.

174 Data analysis was performed within R, using the following packages: *phyloseq* (data filtering, heatmaps, alpha  
175 diversity) (McMurdie and Holmes 2013), *tidyr* (Wickham et al. 2019), *vegan* (NMDS) (Dixon 2003), *ggplot2*  
176 (plotting, Wickham 2016), *ComplexUpset* (upSet graphics, Krassowski 2020). Abundant ASVs for each size  
177 fraction were selected by keeping only ASVs which were among the top 90% most abundant sequences in at  
178 least one sample. Abundant taxa for the whole community (i.e. considering all size fractions) had to be among  
179 the top 90% most abundant sequences in at least 10% of the samples, except for the intersection analysis (upSet  
180 graphic), where taxa present in the top 70% of sequences in at least one sample were filtered. This was done with  
181 the *topf* and *genefilter\_sample* functions of *phyloseq*. NMDS analysis was performed using Bray–Curtis distance  
182 with the *metaMDS* function of the package *vegan*, and statistically significant environmental parameters (*p*-value  
183  $\leq 0.001$ ) and genera (*p*-value  $\leq 0.05$ ) were mapped against it using the function *envfit*. Indicator species analysis  
184 (*indicspecies* package, De Cáceres et al. 2010) was performed with abundant taxa (selected as described above)  
185 within each size fraction in order to find significant association between taxa and a given sector (or combination  
186 of sectors), using the default *IndVal* index as statistic test and 9999 random permutations. Global distribution  
187 of ASVs was performed using the metaPR<sup>2</sup> database (<https://shiny.metapr2.org>, Vaulot et al. 2022) which  
188 contains metabarcodes from 41 public datasets representing more than 4,000 samples distributed over a wide  
189 range of ecosystems. ASV sequences from the present study were entered in the “Query” panel, and matching  
190 metaPR<sup>2</sup> ASVs (100% similarity) were displayed in the “Map” panel.

## 191 Results

192 We sampled the phytoplankton community across the marginal ice zone in Baffin Bay, Arctic, in June and July  
193 2016, to assess changes related to sea-ice melt. The community was sequentially filtered for three size fractions  
194 (0.2-3  $\mu\text{m}$ , 3-20  $\mu\text{m}$  and  $> 20 \mu\text{m}$ ), and sampling stations were classified as Under Ice (UI), Marginal Ice Zone  
195 (MIZ) and Open Water (OW) sectors (Tables 1 and 2).

### 196 Physical, chemical and biological variability

197 Temperature were lower in the Arctic-influenced UI sector and higher in terms of both absolute values and  
198 median in the Atlantic-influenced OW sector. Temperature differences between the two sectors were statistically  
199 significant (Figure 1 and 2A). Salinity was not significantly different between the two ice-influenced UI and  
200 MIZ sectors, with a wider distribution towards less saline sampling points influenced by sea-ice melt. Salinity  
201 values were less variable in the OW sector, narrowly ranging between 33.6 and 34 (Figure 2B, Supplementary  
202 data S1). Chl fluorescence from the CTD was higher in MIZ and the well-lit OW sector, reaching its peak in the  
203 former sector with  $14.5 \text{ mg}\cdot\text{m}^{-3}$  (Figure 2C). The mixed layer depth (MLD) was significantly different between  
204 the UI and OW sectors, being deeper in the UI sector, varying from 27 to 46 m. UI and OW were also distinct  
205 from MIZ, with the MLD ranging from 4 to 12 m (Figure 2D). PAR ( $\text{mol photons}^{-2}\cdot\text{d}^{-1}$ ) was not significantly  
206 different between MIZ and OW, although variability was greater in the MIZ, in keeping with the variable ice  
207 cover (Figure 2E).

208 Nitracline depth was significantly distinct between sectors, in general being deeper in the OW sector and  
209 always larger than 30 m. In the UI sector it was never deeper than 8 m, while in the MIZ sector the nitracline  
210 depth was variable, with values ranging from 0 and 20 m (Figure 2F). Nutrient concentrations were in general  
211 higher in the UI sector, compared to MIZ and OW. MIZ was more similar to OW than UI for all nutrients and  
212 ratios measured (Figure S1A-I). Nitrate, phosphate, silica, colored dissolved organic matter (CDOM), urea,  
213 particulate organic nitrogen (PON) and carbon (POC) differed significantly between the UI and OW sectors  
214 (Figure S1 and S2). Urea concentrations were higher in the UI sector, reaching  $1.9 \times 10^3 \mu\text{M}$ , almost the double  
215 the maximum concentration from the other sectors (Figure S1A). Although ammonium concentrations did not  
216 differ significantly between the sectors, values higher than  $0.8 \mu\text{M}$  were only found in the UI sector, up to  $7.7$   
217  $\mu\text{M}$  (Figure S1B). Ammonium assimilation and regeneration were significantly different between the different  
218 sectors, with higher median values found in the MIZ sector (Figure S2G-H), while urea assimilation decreased in  
219 the UI sector and nitrate assimilation was somewhat even among all sectors (Figure S2I-J). DON and primary  
220 production were higher in the MIZ sector, although the highest values from the latter were obtained in the UI  
221 sector, up to  $88 \mu\text{gC}\cdot\text{L}^{-1}\cdot\text{day}^{-1}$  (Figure S2L).



## 222 **Phytoplankton abundance**

223 Phytoplankton abundance measured by flow cytometry revealed different distribution patterns between pico  
224 (0.2-3  $\mu\text{m}$ ) and nano (3-20  $\mu\text{m}$ ) size fractions (Figure 2G-H). Pico-phytoplankton abundance was greatest in the  
225 UI sector (up to  $39 \times 10^3$  cells.mL<sup>-1</sup>), and lowest values in the OW sector ( $0.95 \times 10^3$  cells.mL<sup>-1</sup> on average)  
226 (Figure 2G). Differences between sectors were highly significant for the smallest size fraction, in contrast to nano-  
227 phytoplankton, where only the extremes UI and OW differed significantly. Nano-phytoplankton abundance was  
228 the highest in the MIZ sector (up to  $22 \times 10^3$  cells.mL<sup>-1</sup>), although the median was the highest in OW  
229 (Figure 2H). FCM cryptophyte abundance differed significantly among all sectors, with much higher values in  
230 UI (up to 182 cells.mL<sup>-1</sup>) than in MIZ and especially in OW, where they were virtually absent (Figure 2I).  
231 Pico- and nano-phytoplankton abundance was in general higher in surface and decreased with depth in UI, while  
232 in OW the pattern was the inverse (Figure 3). Within the MIZ pico-phytoplankton abundance was higher in  
233 surface and subsurface, while nano-phytoplankton peaked in deeper samples. Cryptophyceae abundance in UI  
234 sector was in general higher in surface/subsurface, but with some abundance peaks in deeper samples (Figure 3).

## 235 **Phytoplankton diversity at the division and genus level**

236 Diversity patterns at the division level had a marked difference between sectors, especially for the smaller  
237 (0.2-3 and 3-20  $\mu\text{m}$ ) size fractions. The 0.2-3  $\mu\text{m}$  size fraction was mostly dominated by Chlorophyta in  
238 the ice-associated (UI+MIZ) sectors throughout the water column, with an important share of Cryptophyta  
239 and Ochrophyta, while in the OW sector Haptophyta reads were predominant, especially in deeper samples  
240 (Figure S3). Differences in diversity between sectors at the division level in the 3-20  $\mu\text{m}$  size fraction were less  
241 marked, although there was in general an increase in Haptophyta towards the MIZ and OW sectors. This size  
242 fraction separation was also marked with more Ochrophyta that dominated the OW sector in surface samples  
243 (Figure S3). In the  $> 20 \mu\text{m}$  size fraction, the Ochrophyta abundance dominated the three sectors with only a  
244 small increase in Haptophyta relative abundance towards MIZ and OW sectors (Figure S3).

245 **0.2-3  $\mu\text{m}$ .** At the genus level, diversity in the 0.2-3  $\mu\text{m}$  size fraction did not differ greatly across sectors  
246 from that observed at the division level, since the two most abundant divisions, Chlorophyta and Haptophyta,  
247 were dominated by the genera *Micromonas* and *Phaeocystis*, respectively (Figure 4). Within Mamiellophyceae,  
248 *Bathycoccus* and *Mantoniella* were mainly detected in ice-associated sectors, the former with higher relative  
249 abundances in the deeper samples and the latter in surface samples. Cryptophyta was mainly dominated by  
250 *Falcomonas* in UI and MIZ, and by *Teleaulax* in the OW sector. Although not very abundant, Bacillario-  
251 phyceae were extremely diverse in ice-associated sectors (Figure 4). It is important to note that the decrease in  
252 *Micromonas* towards the OW sector is corroborated by the large drop in pico-phytoplankton cells abundance  
253 within this sector (Figure 2G).

254 **3-20  $\mu\text{m}$ .** Mamiellophyceae were nearly absent in the 3-20  $\mu\text{m}$  size fraction, except for a small contribution  
255 to surface samples in UI and MIZ. A higher contribution of *Chrysochromulina* within Haptophyta was observed

256 in ice-associated sectors, especially in deeper samples in the UI sector (Figure 4). A higher abundance of  
257 *Teleaulax* relative to *Falcomonas* was observed when comparing the 3-20  $\mu\text{m}$  to the 0.2-3  $\mu\text{m}$  size fraction,  
258 always more present in surface than deeper samples, including in the OW sector. As observed in the smallest  
259 size fraction, Ochrophyta were fairly diverse in ice-associated sectors, with representatives of Bacillariophyceae,  
260 Bolidophyceae, Dictyochophyceae, and Marine Ochrophyta (MOCH-2). *Chaetoceros* was dominant in the OW  
261 sector, especially in surface samples, with a small contribution of *Thalassiosira*.

262  $> 20 \mu\text{m}$ . There was a decrease in non-diatom Ochrophyta representatives in the  $> 20 \mu\text{m}$  size fraction,  
263 although *Dictyocha* and *Triparma* were still present in ice-associated sectors, the former mostly in surface and  
264 the latter in deeper samples (Figure 4). With respect to diatoms, there was an increase in *Porosira*, *Actinocyclus*,  
265 and especially *Thalassiosira* in all the sectors in comparison with other size fractions, and in *Melosira* relative  
266 abundance in ice-associated sectors.

267 NMDS analysis revealed that samples clustered according to size fractions along the first axis and sectors  
268 along the second axis. UI and MIZ were associated with higher nutrient concentration and Cryptophyceae cell  
269 abundance, whereas OW sector presented higher temperatures and use of alternative source of nitrogen, such as  
270 urea and ammonium, indicating the importance of regenerated production (Figure 5A). Statistically significant  
271 genera had a distribution linked to both sectors and size fractions. For example, larger size fractions from ice-  
272 associated samples were correlated with pennate diatoms such as *Pseudo-nitzschia* and *Cylindrotheca*, whereas  
273 smaller size fractions for the same samples were correlated with *Falcomonas*, *Bathycoccus* and *Micromonas*.  
274 Larger size fractions from the OW sector were associated with centric diatoms such as *Thalassiosira*, *Chaetoceros*  
275 and *Eucampia*, and smaller size fractions with *Phaeocystis*.

## 276 **Phytoplankton microdiversity**

277 Taxa grouped by genera mask variability at the species and ASV level. Looking at all the genera with more  
278 than two ASVs in the whole dataset, the ASV-level distribution of taxa yields potential information on niche-  
279 preference. In general, most genera had more ice-associated ASVs compared to OW (Table 3). Interestingly,  
280 several low-abundance taxa harbored high numbers of ice-associated ASVs, for example, the Dictyochophyceae  
281 genus *Pseudochattonella* and the environmental clade 2 of Bolidophyceae. Two groups presented a surprisingly  
282 large number of ASVs: the B clade of Dolichomastigaceae (Mamiellophyceae) with a total of 29 ASVs, and the  
283 centric diatom genus *Chaetoceros* with 35 ASVs (Table 3).

284 Alpha diversity indices indicate that, in general, diversity was higher in the smallest size fraction in the UI  
285 and MIZ sectors, and decreased towards bigger size fractions. However, the Simpson index was lowest in the  
286 3-20  $\mu\text{m}$  size fraction and the highest in the  $> 20 \mu\text{m}$  size fraction (Figure S4). When taking into consideration  
287 only the most abundant ASVs (ranking among the top 70% most abundant sequences in at least one sample),  
288 41 ASVs were shared between all sectors, 16 were exclusive to the UI and MIZ sectors, and 2 were exclusive from  
289 the UI sector, while none was exclusive to the OW sector or to the MIZ and OW taken together (Figure S5).

290 From the ten ASVs exclusive from ice-associated sectors, four were diatoms, three pennate and one centric  
291 diatom, which was also the most abundant, *M. arctica* (ASV\_0025). Three of these ASVs were Haptophyta,  
292 two assigned as *Chrysochromulina* and one to *Phaeocystis cordata*, a species described from the Mediterranean  
293 Sea (Zingone et al. 1999). The other three ASVs were the only representatives of their classes: the uncultivated  
294 MOCH-2 (ASV\_0061), the Cryptophyceae *F. daucoides* (ASV\_0055), and the Mamiellophyceae *Mantoniella*  
295 *squamata* (ASV\_0104) (Figure S5).

## 296 Indicator ASVs

297 In order to find patterns of taxa distribution that could be used as ecological indicators of niche preferences, we  
298 analyzed ASVs distribution on each sector and group of sectors using statistical indices described by De Cáceres  
299 et al., (2010).

300 **0.2-3  $\mu\text{m}$ .** The indicator species analysis identified 39 ASVs that were representatives of one sector or a  
301 group of sectors within the 0.2-3  $\mu\text{m}$  size fraction, 30 of them related to UI (10), MIZ (2), or the UI+MIZ  
302 sector group (18) (Table 4). Among the highly significant taxa within the UI sector ( $p$ -value < 0.001) there  
303 were four Ochrophyta, three diatoms (*M. arctica*, *Fragilariopsis cylindrus* and *Bacillaria paxillifer*), and one  
304 Pelagophyceae (assigned to the genus *Ankylochrysis*). Thirteen AVSs were highly correlated to the MIZ+UI  
305 sector grouping, including two Mamiellophyceae (*B. prasinus* and *Micromonas commoda* A2), two cryptophytes,  
306 both assigned to *F. daucoides*, seven non-diatom Ochrophyta (from the classes MOCH-2, Bolidophyceae, Dicty-  
307 ochophyceae, and Pelagophyceae), and two diatoms (*Pseudo-nitzschia seriata* and *Chaetoceros neogracilis*). A  
308 *M. polaris* ASV (ASV\_0154) was also considered indicator of the MIZ+UI site group, with a  $p$ -value of 0.002.  
309 Taxa indicators of the OW sector (4) included three undescribed Dictyochophyceae (all assigned to *Pedinellales*  
310 sp.), and one undescribed Dolichomastigaceae from clade B, while the three taxa indicators of the MIZ+OW  
311 sector group comprised two centric diatoms (*Porosira glacialis* and *Chaetoceros decipiens*) and one undescribed  
312 Prymnesiophyceae.

313 **3-20  $\mu\text{m}$ .** There was no significant association between taxa and the UI sector in the 3-20  $\mu\text{m}$  size frac-  
314 tion, and the six ASVs that were considered indicators of this sector presented lower  $p$ -values, with *Bacillaria*  
315 *paxillifer* ( $p$ -value = 0.003) and *Pterosperma* sp. ( $p$ -value = 0.0095) presenting the highest association score  
316 (Table 4). Considering only highly significant associations ( $p$ -value < 0.001), *Navicula* sp. (ASV\_0049) was the  
317 only ASV representative of the MIZ, while several Ochrophyta and one Cryptophyta member were identified  
318 as indicators from the MIZ+UI sector group, all of them highly significant related to ice-associated sectors  
319 also in the 0.2-3  $\mu\text{m}$  size fraction: *F. daucoides* (ASV\_0041), *Fragilariopsis cylindrus* (ASV\_0015), *Pseudo-*  
320 *nitzschia seriata* (ASV\_0046), *C. neogracilis* (ASV\_0048), MOCH-2 sp. (ASV\_0061), *Triparma laevis* clade  
321 (ASV\_0073) and *Dictyocha speculum* (ASV\_0075). Two centric diatoms were significantly associated with the  
322 OW sector, *Thalassiosira* sp. (ASV\_0057) and *Chaetoceros rostratus* (ASV\_0177), and another centric diatom  
323 to the MIZ+OW sector group, *Eucampia* sp. (ASV\_0079).

324 > 20  $\mu\text{m}$ . From the 30 highly significant indicator ASVs found in the > 20  $\mu\text{m}$  size fraction, only one was  
325 related to the UI (*Pseudo-nitzschia seriata*, ASV\_0046), one to the MIZ (*Entomoneis ornata*, ASV\_0259), and  
326 two to the OW sector (*Chaetoceros contortus* ASV\_0334 and *Chaetoceros diadema* 1 ASV\_0407) (Table 4).  
327 Fifteen ASVs were highly related to the MIZ+UI sector group, including two *M. arctica* ASVs (0009 and  
328 0025) and some also related to ice-associated sectors in the other size fractions: *Navicula* sp. (ASV\_0049),  
329 *Triparma laevis* clade (ASV\_0073), *Dictyocha speculum* (ASV\_0075), and *Bacillaria paxillifer* (ASV\_0219).  
330 From the eleven indicator ASVs strongly associated with the MIZ+OW sector group, ten were centric diatoms,  
331 including four *Chaetoceros*, four *Thalassiosira*, one *Eucampia* sp. and one *Detonula confervacea* (ASV\_0137).  
332 Interestingly, the most abundant ASV from the whole dataset, *P. pouchetii* (ASV\_0001), was also highly related  
333 to the MIZ+OW sector group in the > 20  $\mu\text{m}$  size fraction (Table 4).

### 334 Distribution of abundant ASVs

335 The distribution of the ten most abundant ASVs within each division demonstrated that although the dominant  
336 community might be comprised of few genera, ASV-level distribution follows distinct patterns within these gen-  
337 era and even within the same species (Figure 6). It is also notable that some ASVs were particularly adapted  
338 to distinct environments, regardless of differences between sectors, since they were present (and abundant)  
339 throughout the dataset, such as *M. polaris* (ASV\_0003), *Teleaulax glacialis* (ASV\_0038) and *P. pouchetii*  
340 (ASV\_0001) (Figure 6). Chlorophyta top 10 ASVs belonged to five genera: *Bathycoccus*, *Mantoniella*, *Mi-*  
341 *cromonas*, *Pterosperma* and *Pyramimonas*, from which five ASVs were significantly correlated to ice-associated  
342 sectors. *M. polaris* ASV\_0154 had a single base pair difference with *M. polaris* ASV\_0003 (Figure S6) and  
343 was less abundant than the latter in our dataset (Figure 6), as well as in other Arctic datasets (Figure S7). *M.*  
344 *squamata* (ASV\_0104) and *Pterosperma* sp. (ASV\_0244) were present in UI samples, mainly within 0.2-3, but  
345 also in the 3-20  $\mu\text{m}$  size fraction.

346 Within the top 10 most abundant Cryptophyta ASVs, three were assigned as *F. daucooides*. While ASV\_0041  
347 *F. daucooides* was strongly associated with MIZ+UI samples for both 0.2-3 and 3-20  $\mu\text{m}$  size fractions but also  
348 found in the OW sector, ASV\_0055 was exclusively found in ice-associated sectors in the smaller size fraction  
349 (Figure 6). *T. gracilis* ASV\_0038 was highly abundant at all sectors, but was flagged as indicator ASV for the  
350 MIZ+UI sector group in the > 20  $\mu\text{m}$  size fraction.

351 Five *Chrysochromulina* and three *Phaeocystis* ASVs comprised the ten most abundant Haptophyta, three of  
352 them only found in ice-associated sectors. Interestingly, *P. cordata* ASV\_0105 and *Phaeocystis* sp. ASV\_0125  
353 were strongly associated with both UI or MIZ+UI sector group, while *P. pouchetii* ASV\_0001 was associated  
354 with the larger size fraction of MIZ+OW, although highly abundant at all stations (Figure 6).

355 The most abundant non-diatom Ochrophyta were MOCH-2 ASV\_0061, *D. speculum* ASV\_0075 and *T. laevis*  
356 ASV\_0073, all of them flagged as ice-associated indicator ASVs in all size fractions, except for MOCH-2, which  
357 was not an indicator for the > 20  $\mu\text{m}$  size fraction (Figure 6).

358 Many diatoms were flagged as indicator species for ice-associated sectors, including pennate diatoms such as *P.*  
359 *seriata*, *Navicula* sp., and *Fragilaria* sp., and centric diatoms such as *M. arctica* and *C. neogracilis*. Interestingly,  
360 from the five *Thalassiosira* ASVs ranking as most abundant Ochrophyta, four were considered indicator species  
361 of OW or MIZ+OW sectors, while *Thalassiosira antarctica* was mainly associated with the smaller size fractions  
362 of the MIZ sector, although present at all sectors. Other centric diatoms were also indicators of the MIZ+OW  
363 sectors, such as *Eucampia* sp. ASV\_0079 and *P. glacialis* ASV\_0016 ASV\_0073 (Figure 6). The distribution  
364 of three abundant *Thalassiosira* flagged as OW or MIZ+OW indicators ASVs have been previously described as  
365 having a broad distribution in both lower and higher latitudes in relation to the sampled area from the present  
366 study (Figure S8).

## 367 Discussion

### 368 General bloom progression

369 Under-ice blooms are reported from throughout the Arctic, but the onset conditions, biogeochemical dynamics  
370 and taxa succession are subjected to regional features (Ardyna et al. 2020). Although the Green Edge cruise  
371 transects were east-west spatial snapshots, the sampling strategy recovered nutrients, cell abundance, plankton  
372 diversity and metabolism variability as the bloom progressed from UI to OW (Lafond et al. 2019; Randelhoff  
373 et al. 2019; Saint-Béat et al. 2020; Vilgrain et al. 2021). During pre-bloom conditions, photosynthetic activity  
374 is limited by light availability, and under-ice populations are shade-acclimated (Ardyna et al. 2020). During the  
375 Green Edge campaign, however, light availability and vertical mixing should have permitted a bloom initiation  
376 under nearly 100% sea-ice cover (UI sector), but the bloom peaked in terms of chlorophyll-a approximately 10  
377 days after ice retreat (Randelhoff et al. 2019), around the limit between the MIZ and the OW sector.

378 In general, FCM abundance data indicated higher pico- and nano-phytoplankton abundances within the MIZ  
379 and the OW sectors, respectively. Although the micro-phytoplankton size fraction was not counted by FCM, the  
380 amplicon data suggests a community structure shift from smaller to larger size fractions as the bloom progresses.  
381 FCM data shows that while UI pico-phytoplankton reached its maximum and was relatively well distributed  
382 down the euphotic zone of the water column, nano-phytoplankton community was particularly abundant right  
383 beneath the sea-ice, indicating a close association between the top of the water column and the bottom of the  
384 sea-ice (Figure 3). Interestingly, contrary to cell abundance, the relative abundance of the main genera did  
385 not seem to change with depth within the UI sector, except for a higher contribution of *Phaeocystis* spp. and  
386 *Teleaulax* sp. reads in surface. Diversity decreased eastward from the UI to the OW sector, which represents the  
387 different stages of the phytoplankton spring bloom but is also influenced by the different water masses within  
388 Baffin Bay. Ice-associated stations, most still covered with sea-ice and categorized as low-productivity stations  
389 by Lafond et al. (2019), harbored the most diverse community, from the genus to the ASV level, and within  
390 every size fraction (Figure 4, Table 3). Under-ice communities are adapted to low-light environments, capable of  
391 maximizing light absorption by increasing intracellular concentrations of accessory and photosynthetic pigments  
392 (Lewis et al. 2019). Smaller phytoplankton cells from the Beaufort Sea were reported to be more efficient at  
393 harvesting light due partially to an increase in chlorophyll *b* content, which is associated with the low light  
394 conditions in autumn and winter (Matsuoka et al. 2009). Such recruitment due to polar dark conditions might  
395 explain the dominance of *Micromonas*, an early-bloom taxa (Lovejoy et al. 2007) with known persistence during  
396 winter (Joli et al. 2017; Vader et al. 2015), within the UI and MIZ sectors, which represented almost the  
397 total bulk of pico-sized plankton. Several abundant non-diatom ASVs were flagged as indicator ASVs from ice-  
398 associated sectors, especially in the smaller size fraction (Figure 6). Many of these indicator ASVs were found in  
399 datasets from the high Arctic (see ASV diversity subsection below), suggesting that UI and MIZ phytoplankton  
400 communities are highly diverse, probably low-light adapted populations of smaller organisms, which seem to be

401 connected to higher-latitude communities (Kalenitchenko et al. 2019) probably via water mass intrusions from  
402 the Nares Strait and the Smith, Jones and Lancaster Sounds (Bluhm et al. 2015; Tang et al. 2004).

403 We observed a general increase in pico- and nano-phytoplankton cells within MIZ, with a sharp decline towards  
404 the OW sector. The MIZ sector showed evidence of increased biological activity: pico- and nano-phytoplankton  
405 abundance, dissolved and particulate organic carbon concentration, particulate organic nitrogen concentration,  
406 dissolved organic nitrogen release and primary production in general were higher in the MIZ than in the UI  
407 or OW sectors. Vilgrain et al. (2021) reported that near the ice-edge, copepods were heavily pigmented due  
408 partially to full gut content. In the present study, the relatively steady community composition between UI and  
409 MIZ, which comprised the peak of the bloom, may be explained by the seeding of taxa through ice melt water  
410 (Mundy et al. 2011) combined with the “priming” effect suggested by Lewis et al. (2019). The “priming” effect  
411 arises from the acclimation of pre-bloom, under-ice communities to low and highly variable light input due to  
412 patchy snow cover and melt-pond/open water leads formation, resulting in a competitive advantage to rapidly  
413 exploit increasing irradiation (Lewis et al. 2019).

414 As the phytoplankton spring bloom progresses, the phytoplankton community must transition from light-  
415 limited conditions, characteristic of a pre-bloom state, to a high-light, nutrient-limited environment (Lewis et  
416 al. 2019). The nitracline deepened from 0 in UI to more than 30 meters in OW, along with the development of  
417 a subsurface chlorophyll *a* maximum (Randelhoff et al. 2019), as a result of the rapid consumption of inorganic  
418 nutrients in surface, following an expected trend in Arctic plankton phenology (Ardyna et al. 2020; Martin  
419 et al. 2010). In the post-bloom conditions such as found within the OW sector, new production is confined to  
420 deeper layers, and the euphotic layer is then dominated by regenerative production (Sakshaug 2004). Within  
421 ice-free Arctic waters, species might also be subjected to detrimental effects of high UV exposure resulting in low  
422 cell viability and photosynthetic performance decline, a scenario where, in general, diatoms out-compete other  
423 microalgae (Alou-Font et al. 2016). The increase in *Chaetoceros* spp. observed here in the OW sector, especially  
424 in the upper layers within the 3-20  $\mu\text{m}$  size fraction, may reflect an ecological advantage within a post-bloom  
425 scenario, since this genus has a high growth irrespective of nitrogen source in polar (Schiffrine et al. 2020) and  
426 subtropical (Morando and Capone 2018) environments. The only abundant diatoms flagged as indicator ASVs  
427 for OW or MIZ+OW sectors belonged to *Thalassiosira* and *Eucampia*, two genera that were also reported to  
428 be effective scavengers for different nitrogen sources, out-competing other plankton community members within  
429 nutrient poor waters (Morando and Capone 2018). NMDS analysis highlighted the gradient from the UI sector  
430 with higher concentration of major nutrients such as nitrate and phosphate, to the MIZ/OW sector with higher  
431 ammonium and urea assimilation, together with an increase of large ( $> 20 \mu\text{m}$ ) diatoms. Besides the bottom-  
432 up pressure favoring such specialized taxa, the community structure responsible for the secondary production  
433 within the OW sector might also play a role in the differential top-down control of smaller taxa, since, in the  
434 westernmost stations, the copepod populations were dominated by smaller organisms, in particular nauplii and  
435 young copepod stages (Vilgrain et al. 2021).

## 436 **Autotroph microdiversity**

437 Different ASVs within the same species can represent distinct ecotypes, leading to resilience and adaptation  
438 of microbial populations under changing environmental conditions (García-García et al. 2019; Needham and  
439 Fuhrman 2016), and the persistence of particular lineages over time. We have identified several species com-  
440 prising more than one ASV. Sjöqvist & Kremp (2016) reported that genetic diversity within diatom species  
441 ensured an optimized ecological performance, including carbon uptake and overall resistance to environmental  
442 changes.

443 **Diatoms.** Sea-ice has been long recognized as an important substrate for marine diatoms (Horner et al. 1992;  
444 Poulin et al. 2011), where brine channels and pockets serve as habitat for a specific interstitial and sub-ice  
445 community. The centric diatom *M. arctica* is an ice-associated taxon, forming long strands in the water column  
446 attached to the sea-ice (Poulin et al. 2014; Wassmann et al. 2006). This diatom is readily released as ice melts,  
447 rapidly sinking and forming vast sea-floor deposits down to more than 4,000 m depth, with a high impact on  
448 carbon export and benthic fauna (Boetius et al. 2013). Our data indicated two highly abundant *M. arctica*  
449 ASVs not only in UI but also in the MIZ sector, the latter with several ice-free stations. Sampling roughly  
450 the same stations and using microscopy and pigment-based analysis, Lafond et al. (2019) showed that *M.*  
451 *arctica* in the MIZ was mostly in the form of actively silicifying resting spores, reaching up to 82% of biogenic  
452 silica production. The high degree of significance associating *M. arctica* with ice-sectors in the present study  
453 corroborate its assignation as a sea-ice specialist taxa, but the high number of reads in the intermittently  
454 ice-covered Baffin Bay challenges previous work hypothesizing its preference for multi-year sea-ice (Hop et al.  
455 2020).

456 Lafond et al. (2019) observed that diatoms during the melting season in Baffin Bay formed two distinct  
457 community clusters: one less productive, associated with Pacific-originating waters, and another associated  
458 with the core of the diatom bloom, within Atlantic-influenced stations, mainly in open waters or at an advanced  
459 state of sea-ice melting. Our data are consistent with the current view of the succession pattern of the Arctic  
460 diatom bloom, where ice-associated early bloom stages are characterized by a higher diversity of pennate diatoms  
461 while its full development consists of larger centric diatoms, such as *Thalassiosira* and *Chaetoceros* (Oziel et  
462 al. 2019). Such dynamics are partly explained by differences in nutrient acquisition strategies (Morando and  
463 Capone 2018) and by increased photochemical damage experienced by sympagic pennate diatoms under ice-  
464 free, high-luminosity environments (Kvernvik et al. 2020). In the present study, abundant pennate diatoms,  
465 *P. seriata* ASV\_0046, *Navicula* sp. ASV\_0049, and *Fragilaria* sp ASV\_0064, were all flagged as indicator  
466 species for ice-associated sectors. Interestingly, one of the most abundant *Chaetoceros* ASVs (*C. neogracilis*  
467 ASV\_0048) was considered a highly significant ice-associated indicator ASV, but only for the smaller size  
468 fraction. *C. neogracilis* is a species complex with at least four known clades which share identical 18S rRNA  
469 sequences (Balzano et al. 2017), so it is possible that the *C. neogracilis* distribution observed in the present



470 study is masking a finer clade-specific distribution.

471 One of the hypothesis from the present work was that taxa significantly associated with Atlantic-influenced  
472 east Baffin Bay could be due to Atlantification processes that include input of warm-adapted taxa from the  
473 eastern side of Davis Strait, which could thrive after ice melt. However, OW+MIZ indicator taxa that made  
474 up the abundant community, such as *Thalassiosira anguste-lineata* ASV\_0071, *Thalassiosira* sp. ASV\_0057,  
475 and *T. rotula* ASV\_0013, although sometimes displaying a wider distribution towards lower latitudes, are  
476 considered part of the Arctic phytoplankton community, as shown by their distribution over many polar studies  
477 in metaPR<sup>2</sup> (Figure S8). Those ASVs were also found within UI sector, indicating that their attribution as  
478 MIZ+OW indicator taxa was mainly due to a better adaptation to low nutrient post-bloom conditions.

479 **Non-diatom Ochrophyta.** Although Lafond et al. (2019) identified the core of the diatom bloom within Atlantic-  
480 influenced Baffin Bay, our FCM and metabarcoding data indicate the importance of smaller size fractions  
481 within ice-associated sectors in terms of cell abundance and overall plankton diversity. For example, nano-  
482 phytoplankton Ochrophyta diversity within OW was dominated by a single diatom genus, *Chaetoceros*, while  
483 in the UI and MIZ both diatom and non-diatom Ochrophyta were much more diverse, with high abundances of  
484 MOCH-2, *Dictyocha speculum*, *Triparma laevis* clade, flagged as indicator ASVs for ice-associated sectors along  
485 with an unidentified Florenciellales.

486 The presence of the silicoflagellate *D. speculum* (synonym of *Octactis speculum*, Chang et al. 2017) in Arctic  
487 waters was first reported in the region more than a century ago (Lovejoy et al. 2002) and since regularly cited  
488 in the literature (Crawford et al. 2018). Its assignation as an indicator ASV for ice-associated sectors within  
489 all size classes in the present study might be a consequence of the presence of several life stages, including  
490 amoeboid, multinucleate and skeleton-bearing stages with different cell sizes (Chang et al. 2017; Moestrup and  
491 Thomsen 1990). Studying a 35-year sampling series, Hop et al. (2020) reported that this species has a higher  
492 frequency of occurrence in multiyear ice (24 %) in comparison to first-year ice samples (6 %).

493 **Chlorophyta.** The most striking difference between ASV distribution patterns among a dominant species in the  
494 present study was observed within *M. polaris* populations. The Chlorophyta genus *Micromonas* is diverse and  
495 widely distributed from coastal to oceanic waters through all the global latitudinal ranges (Simon et al. 2017;  
496 Tragin and Vaultot 2019). It exhibits a wide thermal niche and is considered a sentinel for polar (Freyria et al.  
497 2021) and global plankton diversity (Demory et al. 2019) in relation to temperature changes in the oceans. The  
498 use of metabarcoding datasets combined with microdiversity approaches has previously allowed the discovery  
499 of new polar *Micromonas* ecotypes, such as the *Micromonas* B3 clade, which displays a wider distribution band  
500 towards lower latitudes than *M. polaris* (Tragin and Vaultot 2019).

501 The *M. polaris* CCMP2099 strain, isolated from North Water Polynya (Lovejoy et al. 2007) and the RCC2306  
502 strain from the Beaufort Sea (holotype of the species, Simon et al. 2017) are 100% similar in the V4 region of  
503 the 18S rRNA to the *M. polaris* ASV\_0003 from the present study. *M. polaris* ASV\_0003 has a widespread

distribution pattern with a high abundance in all sectors, in accordance with its dominant role within the Arctic (Balzano et al. 2012; Lovejoy et al. 2002, 2007; Not et al. 2005). Although *M. polaris* ASV\_0154 differs from ASV\_0003 by a single nucleotide (Fig. S6), its significantly different distribution (Fig. S7), and the assignment of ASV\_0003 as an indicator species, suggests it might represent a new ecotype. There is no 100% similarity match in GenBank with *M. polaris* ASV\_0154, either to strains or environmental sequences. The distribution of *M. polaris* ASV\_0154 is pan-Arctic, although it always contributes to a small fraction of *Micromonas* reads. *M. polaris* ASV\_0154 has also been found in the Nares Strait (metaPR<sup>2</sup> set #42, Kalenitchenko et al. 2019) (Figure S7), also comprising a small fraction of *Micromonas* reads. The Nares Strait is connected to northern Baffin Bay and is responsible for southward transport of waters and ice from the Arctic Ocean into the region (Tang et al. 2004). Using a decade-long 18S rRNA data series, Freyria et al. (2021) have identified *M. polaris* as a summer specialist favored by nutrient-poor waters, in contrast to the present study, which identifies the species either as a generalist, present in all sectors (ASV\_0003) or as an ice-associated indicator ASV (ASV\_0154). The difference in *M. polaris* distribution patterns between Freyria et al. (2021) and the present study might be related to the distinct geographic location, time of sampling and data processing. Freyria et al. (2021) sampled the northernmost sector of Baffin Bay, more precisely the North Water, a hydrographically distinct region, close to 77°N, bordered by Ellesmere Island and Greenland. The authors sampled the transition from summer to autumn, while the present study focus on the transition between spring and summer. *M. polaris* abundance was previously reported decreasing in numbers and activity towards winter, partially due to vulnerability to specific viral infection during this period, and then recovering rapidly even at low irradiances (Joli et al. 2017).

One Chlorophyta ASV was associated with under-ice samples: *Pterosperma* sp. ASV\_0244, which was found exclusively in the UI sector, and flagged as one of the few abundant indicator species from it, and not from the MIZ+UI sector group. Although the genus *Pterosperma* has been reported from several regions within the Arctic (Joli et al. 2017; Lovejoy et al. 2002), with a preference for multi-year ice over first-year ice (Hop et al. 2020), there was no 100% match between ASV\_0244 and any strain or environmental sequence in GenBank. *Pterosperma* sp. ASV\_0244 was only found in three other samples from the 41 global datasets in the metaPR<sup>2</sup> database, in the east coast of Greenland (Kopf et al. 2015) and the Nansen Basin (Metfies et al. 2016). Although previous studies have identified sea-ice associated communities harboring a high relative abundance of *Pyramimonas* (Gradinger 1996; Mundy et al. 2011), our indicator analysis did not detect any specific distribution linked to sea ice for this genus.

**Haptophyta.** *P. pouchetii* is ubiquitous throughout the Arctic (Lasternas and Agustí 2010; Schoemann et al. 2005) and has been reported to be capable of early blooms, even under snow-covered ice pack (Assmy et al. 2017). Although *P. pouchetii* ASV\_0001 reads were present in all size fractions and sectors, the species was flagged as an indicator ASV for the MIZ+OW sector in the > 20 μm size fraction. This might indicate a prevalence of large *P. pouchetii* colonies towards eastern side of Baffin Bay, as the bloom progresses. In general, blooming species of the genus *Phaeocystis* increase their C:N ratios under high light/low nutrient conditions,

539 mainly through the production of the polysaccharide-based mucilaginous matrix embedding colonies reaching  
540 up to 3 cm, which serve as energy storage and a defense against grazers (Schoemann et al. 2005) and references  
541 therein). The dominance of *P. pouchetii* colonial form was reported during the Arctic 2007 ice-melt record  
542 (Lasternas and Agustí 2010), while the single-cell form was reported during overwintering (Vader et al. 2015).  
543 The fact that *P. pouchetii* is adapted to grow in nutrient-replete waters with 100% sea-ice cover such as found in  
544 the UI sector to the nutrient-depleted/high light OW sector corroborates earlier studies identifying this taxa as  
545 a potential winner for future Arctic scenarios, where its plasticity regarding life cycle stages, and flexibility for  
546 light and nutrient uptake, as well as resistance to zooplankton grazing will likely impact polar phytoplankton  
547 community structuring, trophic energy transfer and carbon export (Lasternas and Agustí 2010; Verity et al.  
548 2007; Wassmann et al. 2006).

549 The higher relative contribution of *Chrysochromulina* in deeper samples agrees with previous reports linking  
550 this genus with deep chlorophyll maximum communities (Balzano et al. 2012). Many *Chrysochromulina* spp.  
551 ASVs were exclusively found or flagged as indicator taxa for ice-associated sectors. *Chrysochromulina* frequently  
552 occurs in sympagic communities and is considered one of the few ice-associated haptophytes (Mundy et al. 2011),  
553 but it is also present in ice-free waters from the Arctic (Balzano et al. 2012; Lovejoy et al. 2002) and the Antarctic  
554 (Luo et al. 2016; Trefault et al. 2021). The fact that the genus *Chrysochromulina* is morphometrically highly  
555 diverse (Egge et al. 2014) down to the subspecies level (Balzano et al. 2012; Needham and Fuhrman 2016)  
556 implies that monitoring diversity should comprise high-resolution analysis of species/ecotypes distributions.  
557 Although not really abundant in the present study, *Chrysochromulina* sp. ASV\_0542 was found exclusively  
558 in under-ice samples. It was found previously to reach up to 2% of total eukaryotic reads in the Nares Strait  
559 (metaPR<sup>2</sup> set #42, Kalenitchenko et al. 2019), but not detected elsewhere.

560 The distribution of *Pterosperma* sp. ASV\_0244 and *Chrysochromulina* sp. ASV\_0542 restricted to a limited  
561 Arctic latitudinal band suggests a narrow ecological niche, and its significant association with ice-covered sites  
562 from the present study indicate that those taxa might be good proxies for diversity changes within the region.  
563 Some taxa flagged as indicator ASVs for ice-associated sectors do have a broader range of distribution towards  
564 lower latitudes, such as *Phaeocystis* ASV\_0125 and *M. commoda* A2 ASV\_0235. Whether this distribution  
565 results from the combination of different ecotypes masked by the resolution of the marker gene, or simply  
566 represents taxa out-competed within an ice-free, high-light and low nutrient environment, is still an open  
567 question.

## 568 Conclusions

569 Taking the spatial transects as a temporal snapshot of the phytoplankton spring bloom dynamics over Baffin  
570 Bay, we observed a shift from a highly diverse under-ice and ice-edge community comprised of smaller taxa,  
571 to a low-diversity, highly specialized community where larger centric diatoms and *P. pouchetii* were better  
572 adapted to the harsh high light/low nutrient post-bloom environment. The taxa abundant in the ice-free

573 Atlantic-influenced Baffin Bay were in general also present in Arctic-influenced sectors and other polar studies,  
574 indicating that the advection of warm-adapted taxa by Atlantic inflow was not detectable or significant in this  
575 region. This conclusion must be taken with caution, however, due to the limited space and time sampling range  
576 of the present study. The presence of taxa with intra-species variability such as *F. daucooides*, *M. arctica* and *M.*  
577 *polaris* reinforces the urgency of renewed culturing efforts to better comprehend its ecological impacts. Although  
578 thinner sea-ice might increase the magnitude of the sub-ice blooms of taxa with a high carbon export rate such  
579 as *M. arctica* (Poulin et al. 2014) earlier in the season, our data indicate that as Baffin Bay ice cover shrinks  
580 sooner and faster with spring blooms onset (Stroeve et al. 2014), this might lead to widespread post-bloom  
581 conditions dominated by a much less diverse community, which might have implications in the recruitment of  
582 sympagic communities in subsequent years.

## 583 **Acknowledgements**

584 We wish to thank officers and crew of CCGS Amundsen. The success of the field campaign was widely con-  
585 tributed to G. Bécu, J. Lagunas, D. Christiansen-Stowe, J. Sansoulet, E. Rehm, M. Benoît-Gagné, M.-H. Forget  
586 and F. Bruyant from Takuvik laboratory and J. Bourdon, C. Marec and M. Picheral from CNRS. We also thank  
587 Québec-Océan and the Polar Continental Shelf Program for their in-kind contribution in terms of polar logis-  
588 tics and scientific equipment. We thank the ABIMS platform of the FR2424 (CNRS, Sorbonne Université) for  
589 bioinformatics resources. We thank Margot Tragin for her help during sampling and onboard sample processing.

## 590 **Author contributions statement**

591 CGR, ALS, DM and DV processed the samples and produced data; CGR, DV, NT, CL and ALS analyzed and  
592 interpreted data; CGR and DV wrote the paper; All authors read and approved the final manuscript.

## 593 **Funding information**

594 Catherine Gérikas Ribeiro was supported by the FONDECYT Project No. 3190827. The Green Edge project  
595 was funded by the following French and Canadian programs and agencies: ANR (Contract #111112), ArcticNet,  
596 CERC on Remote sensing of Canada's new Arctic frontier, CNES (project #131425), French Arctic Initiative,  
597 Fondation Total, CSA, LEFE and IPEV (project #1164). This project was conducted using the Canadian  
598 research icebreaker CCGS Amundsen with the support of the Amundsen Science program funded by the Canada  
599 Foundation for Innovation (CFI) Major Science Initiatives (MSI) Fund. The project was conducted under the  
600 scientific coordination of the Canada Excellence Research Chair on Remote sensing of Canada's new Arctic  
601 frontier and the CNRS & Université Laval Takuvik Joint International Laboratory (UMI3376). Nicole Trefault  
602 was supported by Fondecyt No. 1190879 and INACH RT\_34-17.

603 **Additional information**

604 To include, in this order:

605 **Accession codes** (where applicable);

606 **Data availability**

607 Physicochemical and biological data from the Green Edge project are available at [http://www.obs-vlfr.fr/proof/](http://www.obs-vlfr.fr/proof/php/GREENEDGE/x_datalist_1.php?xxop=greenedge&xxcamp=amundsen)  
608 [php/GREENEDGE/x\\_datalist\\_1.php?xxop=greenedge&xxcamp=amundsen](http://www.obs-vlfr.fr/proof/php/GREENEDGE/x_datalist_1.php?xxop=greenedge&xxcamp=amundsen) and at [https://www.seanoe.org/](https://www.seanoe.org/data/00487/59892/)  
609 [data/00487/59892/](https://www.seanoe.org/data/00487/59892/) as described in detail in Bruyant et al. (2022). Raw metabarcoding sequences are available  
610 under the Accession Code PRJNA810033 from GenBank SRA. Source code for sequence processing is available  
611 at [https://github.com/vaulot/Paper-2021-Vaulot-metapr2/tree/main/R\\_processing](https://github.com/vaulot/Paper-2021-Vaulot-metapr2/tree/main/R_processing).

612 **Competing interests** The authors declare no competing financial interests.

613 **ORCID Numbers**

614 • Catherine G erikas Ribeiro: 0000-0003-0531-2313

615

616 • Daniel Vaulot: 0000-0002-0717-5685

617

618 • Nicole Trefault: 0000-0002-4388-6791

619

620 • Connie Lovejoy: 0000-0001-8027-2281

621

622 • Adriana Lopes dos Santos: 0000-0002-0736-4937

623

## 624 References cited

- 625 Alou-Font, E., Roy, S., Agustí, S., & Gosselin, M. (2016). Cell viability, pigments and photosynthetic perfor-  
626 mance of Arctic phytoplankton in contrasting ice-covered and open-water conditions during the spring-  
627 summer transition. *Marine Ecology Progress Series*, 543, 89–106. <https://doi.org/10.3354/meps11562>
- 628 Ardyna, M., Mundy, C. J., Mayot, N., Matthes, L. C., Oziel, L., Horvat, C., Leu, E., Assmy, P., Hill, V., Matrai,  
629 P. A., Gale, M., Melnikov, I. A., & Arrigo, K. R. (2020). Under-Ice Phytoplankton Blooms : Shedding  
630 Light on the “ Invisible ” Part of Arctic Primary Production. *Frontiers in Marine Science*, 7, 1–25.  
631 <https://doi.org/10.3389/fmars.2020.608032>
- 632 Arrigo, K. R., Perovich, D. K., Pickart, R. S., Brown, Z. W., van Dijken, G. L., Lowry, K. E., Mills, M. M.,  
633 Palmer, M. A., Balch, W. M., Bahr, F., Bates, N. R., Benitez-Nelson, C., Bowler, B., Brownlee, E., Ehn,  
634 J. K., Frey, K. E., Garley, R., Laney, S. R., Lubelczyk, L., ... Swift, J. H. (2012). Massive Phytoplankton  
635 Blooms Under Arctic Sea Ice. *Science*, 336, 1408–1408. <https://doi.org/10.1126/science.1215065>
- 636 Arrigo, K. R., Perovich, D. K., Pickart, R. S., Brown, Z. W., van Dijken, G. L., Lowry, K. E., Mills, M. M.,  
637 Palmer, M. A., Balch, W. M., Bates, N. R., Benitez-Nelson, C. R., Brownlee, E., Frey, K. E., Laney,  
638 S. R., Mathis, J., Matsuoka, A., Greg Mitchell, B., Moore, G. W., Reynolds, R. A., ... Swift, J. H.  
639 (2014). Phytoplankton blooms beneath the sea ice in the Chukchi sea. *Deep-Sea Research Part II:  
640 Topical Studies in Oceanography*, 105, 1–16. <https://doi.org/10.1016/j.dsr2.2014.03.018>
- 641 Assmy, P., Fernández-Méndez, M., Duarte, P., Meyer, A., Randelhoff, A., Mundy, C. J., Olsen, L. M., Kauko,  
642 H. M., Bailey, A., Chierici, M., Cohen, L., Doulgeris, A. P., Ehn, J. K., Fransson, A., Gerland, S., Hop,  
643 H., Hudson, S. R., Hughes, N., Itkin, P., ... Granskog, M. A. (2017). Leads in Arctic pack ice enable  
644 early phytoplankton blooms below snow-covered sea ice. *Scientific Reports*, 7, 1–9. [https://doi.org/10.  
645 1038/srep40850](https://doi.org/10.1038/srep40850)
- 646 Balzano, S., Marie, D., Gourvil, P., & Vaultot, D. (2012). Composition of the summer photosynthetic pico and  
647 nanoplankton communities in the Beaufort Sea assessed by T-RFLP and sequences of the 18S rRNA  
648 gene from flow cytometry sorted samples. *The ISME journal*, 6, 1480–1498. [https://doi.org/10.1038/  
649 ismej.2011.213](https://doi.org/10.1038/ismej.2011.213)
- 650 Balzano, S., Percopo, I., Siano, R., Gourvil, P., Chanoine, M., Marie, D., Vaultot, D., & Sarno, D. (2017). Mor-  
651 phological and genetic diversity of Beaufort Sea diatoms with high contributions from the *Chaetoceros*  
652 *neogracilis* species complex. *Journal of Phycology*, 53, 161–187. <https://doi.org/10.1111/jpy.12489>
- 653 Benner, I., Irwin, A. J., & Finkel, Z. (2019). Capacity of the common Arctic picoeukaryote *Micromonas* to  
654 adapt to a warming warming ocean. *Limnology and Oceanography Letters*, 5, 221–227. [https://doi.org/  
655 10.6084/m9](https://doi.org/10.6084/m9)
- 656 Bluhm, B. A., Kosobokova, K. N., & Carmack, E. C. (2015). A tale of two basins: An integrated physical  
657 and biological perspective of the deep Arctic Ocean. *Progress in Oceanography*, 139, 89–121. [https:  
658 //doi.org/10.1016/j.pocean.2015.07.011](https://doi.org/10.1016/j.pocean.2015.07.011)

- 659 Boetius, A., Albrecht, S., Bakker, K., Bienhold, C., Felden, J., Fernández-Méndez, M., Hendricks, S., Katlein, C.,  
660 Lalande, C., Krumpfen, T., Nicolaus, M., Peeken, I., Rabe, B., Rogacheva, A., Rybakova, E., Somavilla,  
661 R., Wenzhöfer, F., & Felden, J. (2013). Export of algal biomass from the melting arctic sea ice. *Science*,  
662 *339*, 1430–1432. <https://doi.org/10.1126/science.1231346>
- 663 Bruyant, F., Amiraux, R., Amyot, M.-P., Archambault, P., Artigue, L., Bardedo de Freitas, L., Bécu, G.,  
664 Bélanger, S., Bourgain, P., Bricaud, A., Brouard, E., Brunet, C., Burgers, T., Caleb, D., Chalut, K.,  
665 Clautre, H., Cornet-Barthaux, V., Coupel, P., Cusa, M., ... Babin, M. (2022). The Green Edge cruise:  
666 Understanding the onset, life and fate of the Arctic phytoplankton spring bloom. *Earth Syst. Sci.*,  
667 *preprint*, 1–47.
- 668 Callahan, B. J., McMurdie, P. J., Rosen, M. J., Han, A. W., Johnson, A. J. A., & Holmes, S. P. (2016).  
669 DADA2: High-resolution sample inference from Illumina amplicon data. *Nature Methods*, *13*, 581–583.  
670 <https://doi.org/10.1038/nmeth.3869>
- 671 Chang, F. H., Sutherland, J., Ehrenberg, D., & Schrader, D. (2017). Taxonomic revision of Dictyochales ( Dicty-  
672 ochophyceae ) based on morphological , ultrastructural , biochemical and molecular data. *Phycological*  
673 *Research*, *65*, 235–247. <https://doi.org/10.1111/pre.12181>
- 674 Comeau, A. M., Philippe, B., Thaler, M., Gosselin, M., Poulin, M., & Lovejoy, C. (2013). Protists in Arctic  
675 Drift and Land-Fast Sea Ice. *Journal of Phycology*, *49*, 229–240. <https://doi.org/10.1111/jpy.12026>
- 676 Crawford, D. W., Cefarelli, A. O., Wrohan, I. A., Wyatt, S. N., & Varela, D. E. (2018). Spatial patterns in  
677 abundance, taxonomic composition and carbon biomass of nano- and microphytoplankton in Subarctic  
678 and Arctic Seas. *Progress in Oceanography*, *162*, 132–159. <https://doi.org/10.1016/j.pocean.2018.01.006>
- 679 De Cáceres, M., Legendre, P., & Moretti, M. (2010). Improving indicator species analysis by combining groups  
680 of sites. *Oikos*, *119*, 1674–1684. <https://doi.org/10.1111/j.1600-0706.2010.18334.x>
- 681 Demory, D., Baudoux, A.-C., Monier, A., Simon, N., Six, C., Ge, P., Marie, D., Sciandra, A., & Rabouille, S.  
682 (2019). Picoeukaryotes of the *Micromonas* genus: sentinels of a warming ocean. *The ISME Journal*, *13*,  
683 132–146.
- 684 Dixon, P. (2003). Computer program review VEGAN , a package of R functions for community ecology. *Journal*  
685 *of Vegetation Science*, *14*, 927–930. <http://doi.wiley.com/10.1111/j.1654-1103.2002.tb02049.x>
- 686 Egge, E. S., Eikrem, W., & Edvardsen, B. (2014). Deep-branching Novel Lineages and High Diversity of Hap-  
687 tophytes in the Skagerrak (Norway) Uncovered by 454 pyrosequencing. *The Journal of Eukaryotic*  
688 *Microbiology*, 1–20. <https://doi.org/10.1111/jeu.12157>
- 689 Freyria, N. J., Joli, N., & Lovejoy, C. (2021). A decadal perspective on north water microbial eukaryotes as  
690 Arctic Ocean sentinels. *Scientific Reports*, *11*, 1–14. <https://doi.org/10.1038/s41598-021-87906-4>
- 691 García-García, N., Tamames, J., Linz, A. M., Pedrós-Alió, C., & Puente-Sánchez, F. (2019). Microdiversity  
692 ensures the maintenance of functional microbial communities under changing environmental conditions.  
693 *ISME Journal*, *13*, 2969–2983. <https://doi.org/10.1038/s41396-019-0487-8>

- 694 Gradinger, R. (1996). Occurrence of an algal bloom under Arctic pack ice. *Marine Ecology Progress Series*, 131,  
695 301–305. <https://doi.org/10.3354/meps131301>
- 696 Guillou, L., Bachar, D., Audic, S., Bass, D., Berney, C., Bittner, L., Boutte, C., Burgaud, G., De Vargas, C.,  
697 Decelle, J., Del Campo, J., Dolan, J. R., Dunthorn, M., Edvardsen, B., Holzmann, M., Kooistra, W. H.,  
698 Lara, E., Le Bescot, N., Logares, R., ... Christen, R. (2013). The Protist Ribosomal Reference database  
699 (PR<sup>2</sup>): A catalog of unicellular eukaryote Small Sub-Unit rRNA sequences with curated taxonomy.  
700 *Nucleic Acids Research*, 41, D597–D604. <https://doi.org/10.1093/nar/gks1160>
- 701 Hardge, K., Peeken, I., Neuhaus, S., Lange, B. A., Stock, A., Stoeck, T., Weinisch, L., & Metfies, K. (2017).  
702 The importance of sea ice for exchange of habitat-specific protist communities in the Central Arctic  
703 Ocean. *Journal of Marine Systems*, 165, 124–138. <https://doi.org/10.1016/j.jmarsys.2016.10.004>
- 704 Hegseth, N. E., & Sundfjord, A. (2008). Intrusion and blooming of Atlantic phytoplankton species in the high  
705 Arctic. *Journal of Marine Systems*, 74, 108–119. <https://doi.org/10.1016/j.jmarsys.2007.11.011>
- 706 Hilligsøe, K. M., Richardson, K., Bendtsen, J., Sørensen, L. L., Nielsen, T. G., & Lyngsgaard, M. M. (2011).  
707 Linking phytoplankton community size composition with temperature, plankton food web structure  
708 and sea-air CO<sub>2</sub> flux. *Deep-Sea Research Part I: Oceanographic Research Papers*, 58, 826–838. <https://doi.org/10.1016/j.dsr.2011.06.004>
- 709
- 710 Hop, H., Mundy, C. J., Gosselin, M., Rosznagel, A. L., & Barber, D. G. (2011). Zooplankton boom and ice  
711 amphipod bust below melting sea ice in the Amundsen Gulf, Arctic Canada. *Polar Biology*, 34, 1947–  
712 1958. <https://doi.org/10.1007/s00300-011-0991-4>
- 713 Hop, H., Vihtakari, M., Bluhm, B. A., Assmy, P., Poulin, M., Gradinger, R., Peeken, I., von Quillfeldt, C., Olsen,  
714 L. M., Zhitina, L., & Melnikov, I. A. (2020). Changes in Sea-Ice Protist Diversity With Declining Sea  
715 Ice in the Arctic Ocean From the 1980s to 2010s. *Frontiers in Marine Science*, 7. <https://doi.org/10.3389/fmars.2020.00243>
- 716
- 717 Hoppe, C. J. M., Flintrop, C. M., & Rost, B. (2018). The arctic picoeukaryote *Micromonas pusilla* benefits  
718 synergistically from warming and ocean acidification. *Biogeosciences*, 15, 4353–4365. <https://doi.org/10.5194/bg-15-4353-2018>
- 719
- 720 Horner, R., Ackley, S. F., Dieckmann, G. S., Gulliksen, B., Hoshiai, T., Legendre, L., Melnikov, I. A., Reeburgh,  
721 W. S., Spindler, M., & Sullivan, C. W. (1992). Ecology of sea ice biota - 1. Habitat, terminology, and  
722 methodology. *Polar Biology*, 12, 417–427. <https://doi.org/10.1007/BF00243113>
- 723 Horvat, C., Jones, D. R., Iams, S., Schroeder, D., Flocco, D., & Feltham, D. (2017). The frequency and extent  
724 of sub-ice phytoplankton blooms in the Arctic Ocean. *Science Advances*, 3, e1601191. <https://doi.org/10.1126/sciadv.1601191>
- 725
- 726 Janout, M. A., Hölemann, J., Waite, A. M., Krumpen, T., von Appen, W. J., & Martynov, F. (2016). Sea-ice  
727 retreat controls timing of summer plankton blooms in the Eastern Arctic Ocean. *Geophysical Research  
728 Letters*, 43, 12, 493–12, 501. <https://doi.org/10.1002/2016GL071232>



- 729 Joli, N., Monier, A., Logares, R., & Lovejoy, C. (2017). Seasonal patterns in Arctic prasinophytes and inferred  
730 ecology of Bathycoccus unveiled in an Arctic winter metagenome. *ISME Journal*, *11*, 1372–1385. <https://doi.org/10.1038/ismej.2017.7>  
731
- 732 Jones, E. P., Swift, J. H., Anderson, L. G., Lipizer, M., Civitarese, G., Falkner, K. K., Kattner, G., & McLaughlin,  
733 F. (2003). Tracing Pacific water in the North Atlantic Ocean. *Journal of Geophysical Research C: Oceans*, *108*, 13–1. <https://doi.org/10.1029/2001jc001141>  
734
- 735 Kalenitchenko, D., Joli, N., Potvin, M., Tremblay, J. é., & Lovejoy, C. (2019). Biodiversity and species change  
736 in the Arctic Ocean: A view through the lens of Nares Strait. *Frontiers in Marine Science*, *6*, 1–17.  
737 <https://doi.org/10.3389/fmars.2019.00479>
- 738 Kauko, H. M., Olsen, L. M., Duarte, P., Peeken, I., Granskog, M. A., Johnsen, G., Fernández-Méndez, M.,  
739 Pavlov, A. K., Mundy, C. J., & Assmy, P. (2018). Algal Colonization of Young Arctic Sea Ice in Spring.  
740 *Frontiers in Marine Science*, *5*, 1–20. <https://doi.org/10.3389/fmars.2018.00199>
- 741 Kinney, J. C., Maslowski, W., Osinski, R., Jin, M., Frants, M., Jeffery, N., & Lee, Y. J. (2020). Hidden Pro-  
742 duction: On the Importance of Pelagic Phytoplankton Blooms Beneath Arctic Sea Ice. *Journal of*  
743 *Geophysical Research: Oceans*, *125*. <https://doi.org/10.1029/2020JC016211>
- 744 Kopf, A., Bicak, M., Kottmann, R., Schnetzer, J., Kostadinov, I., Lehmann, K., Fernandez-Guerra, A., Jeanthon,  
745 C., Rahav, E., Ullrich, M., Wichels, A., Gerdts, G., Polymenakou, P., Kotoulas, G., Siam, R., Abdallah,  
746 R. Z., Sonnenschein, E. C., Cariou, T., O’Gara, F., ... Glöckner, F. O. (2015). The ocean sampling day  
747 consortium. *GigaScience*, *4*. <https://doi.org/10.1186/s13742-015-0066-5>
- 748 Krassowski, M. (2020). Complexupset. <https://doi.org/10.5281/zenodo.3700590>
- 749 Kvernvik, A. C., Rokitta, S. D., Leu, E., Harms, L., Gabrielsen, T. M., Rost, B., & Hoppe, C. J. (2020). Higher  
750 sensitivity towards light stress and ocean acidification in an Arctic sea-ice-associated diatom compared  
751 to a pelagic diatom. *New Phytologist*, *226*, 1708–1724. <https://doi.org/10.1111/nph.16501>
- 752 Lafond, A., Leblanc, K., Quéguiner, B., Moriceau, B., Leynaert, A., Cornet, V., Legras, J., Ras, J., Parenteau,  
753 M., Garcia, N., Babin, M., & Tremblay, J.-É. (2019). Late spring bloom development of pelagic diatoms  
754 in Baffin Bay. *Elementa: Science of the Anthropocene*, *7*, 1–24.
- 755 Lalande, C., Bauerfeind, E., Nöthig, E. M., & Beszczynska-Möller, A. (2013). Impact of a warm anomaly on  
756 export fluxes of biogenic matter in the eastern Fram Strait. *Progress in Oceanography*, *109*, 70–77.  
757 <https://doi.org/10.1016/j.pocean.2012.09.006>
- 758 Lasternas, S., & Agustí, S. (2010). Phytoplankton community structure during the record Arctic ice-melting of  
759 summer 2007. *Polar Biology*, *33*, 1709–1717. <https://doi.org/10.1007/s00300-010-0877-x>
- 760 Leu, E., Mundy, C. J., Assmy, P., Campbell, K., Gabrielsen, T. M., Gosselin, M., Juul-Pedersen, T., & Gradinger,  
761 R. (2015). Arctic spring awakening - Steering principles behind the phenology of vernal ice algal blooms.  
762 *Progress in Oceanography*, *139*, 151–170. <https://doi.org/10.1016/j.pocean.2015.07.012>

- 763 Leu, E., Søreide, J. E., Hessen, D. O., Falk-Petersen, S., & Berge, J. (2011). Consequences of changing sea-ice  
764 cover for primary and secondary producers in the European Arctic shelf seas: Timing, quantity, and  
765 quality. *Progress in Oceanography*, *90*, 18–32. <https://doi.org/10.1016/j.pocean.2011.02.004>
- 766 Lewis, K. M., Arntsen, A. E., Coupel, P., Joy-Warren, H., Lowry, K. E., Matsuoka, A., Mills, M. M., van Dijken,  
767 G. L., Selz, V., & Arrigo, K. R. (2019). Photoacclimation of Arctic Ocean phytoplankton to shifting light  
768 and nutrient limitation. *Limnology and Oceanography*, *64*, 284–301. <https://doi.org/10.1002/lno.11039>
- 769 Li, W. K., McLaughlin, F. A., Lovejoy, C., & Carmack, E. C. (2009). Smallest algae thrive as the Arctic Ocean  
770 freshens. *Science*, *326*, 539. <https://doi.org/10.1126/science.1179798>
- 771 Lovejoy, C., Legendre, L., Martineau, M. J., Bâcle, J., & Von Quillfeldt, C. H. (2002). Distribution of phytoplank-  
772 ton and other protists in the North Water. *Deep-Sea Research Part II: Topical Studies in Oceanography*,  
773 *49*, 5027–5047. [https://doi.org/10.1016/S0967-0645\(02\)00176-5](https://doi.org/10.1016/S0967-0645(02)00176-5)
- 774 Lovejoy, C., & Potvin, M. (2011). Microbial eukaryotic distribution in a dynamic Beaufort Sea and the Arctic  
775 Ocean. *Journal of Plankton Research*, *33*, 431–444. <https://doi.org/10.1093/plankt/fbq124>
- 776 Lovejoy, C., Vincent, W. F., Bonilla, S., Roy, S., Martineau, M. J., Terrado, R., Potvin, M., Massana, R., &  
777 Pedrós-Alió, C. (2007). Distribution, phylogeny, and growth of cold-adapted picoprasinophytes in arctic  
778 seas. *Journal of Phycology*, *43*, 78–89. <https://doi.org/10.1111/j.1529-8817.2006.00310.x>
- 779 Luo, W., Li, H., Gao, S., Yu, Y., Lin, L., & Zeng, Y. (2016). Molecular diversity of microbial eukaryotes in  
780 sea water from Fildes Peninsula, King George Island, Antarctica. *Polar Biology*, *39*, 605–616. <https://doi.org/10.1007/s00300-015-1815-8>
- 781
- 782 Marie, D., Partensky, F., Jacquet, S., & Vaultot, D. (1997). Enumeration and cell cycle analysis of natural  
783 populations of marine picoplankton by flow cytometry using the nucleic acid stain SYBR Green I.  
784 *Applied and Environmental Microbiology*, *63*, 186–193. <https://doi.org/10.1128/aem.63.1.186-193.1997>
- 785 Marie, D., Shi, X. L., Rigaut-Jalabert, F., & Vaultot, D. (2010). Use of flow cytometric sorting to better assess  
786 the diversity of small photosynthetic eukaryotes in the English Channel. *FEMS microbiology ecology*,  
787 *72*, 165–78. <https://doi.org/10.1111/j.1574-6941.2010.00842.x>
- 788 Martin, J., Tremblay, J. É., Gagnon, J., Tremblay, G., Lapoussière, A., Jose, C., Poulin, M., Gosselin, M.,  
789 Gratton, Y., & Michel, C. (2010). Prevalence, structure and properties of subsurface chlorophyll maxima  
790 in Canadian Arctic waters. *Marine Ecology Progress Series*, *412*, 69–84. <https://doi.org/10.3354/meps08666>
- 791
- 792 Massicotte, P., Amiraux, R., Amyot, M. P., Archambault, P., Ardyna, M., Arnaud, L., Artigue, L., Aubry,  
793 C., Ayotte, P., Bécu, G., Bélanger, S., Benner, R., Bittig, H. C., Bricaud, A., Brossier, É., Bruyant,  
794 F., Chauvaud, L., Christiansen-Stowe, D., Claustre, H., ... Babin, M. (2020). Green edge ice camp  
795 campaigns: Understanding the processes controlling the under-ice arctic phytoplankton spring bloom.  
796 *Earth System Science Data*, *12*, 151–176. <https://doi.org/10.5194/essd-12-151-2020>

- 797 Matsuoka, A., Larouche, P., Poulin, M., Vincent, W., & Hattori, H. (2009). Phytoplankton community adap-  
798 tation to changing light levels in the southern Beaufort Sea, Canadian Arctic. *Estuarine, Coastal and*  
799 *Shelf Science*, *82*, 537–546. <https://doi.org/10.1016/j.ecss.2009.02.024>
- 800 McMurdie, P. J., & Holmes, S. (2013). Phyloseq: An R Package for Reproducible Interactive Analysis and  
801 Graphics of Microbiome Census Data. *PLoS ONE*, *8*. <https://doi.org/10.1371/journal.pone.0061217>
- 802 Meredith, M., Sommerkorn, M., Cassotta, S., Derksen, C., Ekaykin, A., Hollowed, A., Kofinas, G., Mackintosh,  
803 A., Melbourne-Thomas, J., Muelbert, M., Ottersen, G., Pritchard, H., & Schuur, E. (2019). Polar  
804 regions, In *Ippc special report on the ocean and cryosphere in a changing climate*. [https://doi.org/10.](https://doi.org/10.1016/S1366-7017(01)00066-6)  
805 [1016/S1366-7017\(01\)00066-6](https://doi.org/10.1016/S1366-7017(01)00066-6)
- 806 Metfies, K., Von Appen, W. J., Kiliyas, E., Nicolaus, A., & Nöthig, E. M. (2016). Biogeography and photosynthetic  
807 biomass of arctic marine pico-eukaryotes during summer of the record sea ice minimum 2012. *PLoS*  
808 *ONE*, *11*, 1–20. <https://doi.org/10.1371/journal.pone.0148512>
- 809 Moestrup, Ø., & Thomsen, H. (1990). *DICTYOCHA SPECULUM* ( SILICOFLLAGELLATA, DICTYOCHOPHYCEAE).  
810 STUDIES ON ARMOURED AND UNARMOURED STAGES . *Danske Vidensk. Selsk. Biol. Skr.*, *37*,  
811 1–56.
- 812 Morán, X. A. G., López-Urrutia, Á., Calvo-Díaz, A., & LI, W. K. (2010). Increasing importance of small  
813 phytoplankton in a warmer ocean. *Global Change Biology*, *16*, 1137–1144. [https://doi.org/10.1111/j.](https://doi.org/10.1111/j.1365-2486.2009.01960.x)  
814 [1365-2486.2009.01960.x](https://doi.org/10.1111/j.1365-2486.2009.01960.x)
- 815 Morando, M., & Capone, D. G. (2018). Direct utilization of organic nitrogen by phytoplankton and its role  
816 in nitrogen cycling within the southern California bight. *Frontiers in Microbiology*, *9*, 1–13. <https://doi.org/10.3389/fmicb.2018.02118>
- 817
- 818 Münchow, A., Falkner, K. K., & Melling, H. (2015). Baffin Island and West Greenland Current Systems in  
819 northern Baffin Bay. *Progress in Oceanography*, *132*, 305–317. [https://doi.org/10.1016/j.pocean.2014.](https://doi.org/10.1016/j.pocean.2014.04.001)  
820 [04.001](https://doi.org/10.1016/j.pocean.2014.04.001)
- 821 Mundy, C. J., Gosselin, M., Ehn, J. K., Belzile, C., Poulin, M., Alou, E., Roy, S., Hop, H., Lessard, S., Pa-  
822 pakyriakou, T. N., Barber, D. G., & Stewart, J. (2011). Characteristics of two distinct high-light accli-  
823 mated algal communities during advanced stages of sea ice melt. *Polar Biology*, *34*, 1869–1886. <https://doi.org/10.1007/s00300-011-0998-x>
- 824
- 825 Needham, D. M., & Fuhrman, J. A. (2016). Pronounced daily succession of phytoplankton, archaea and bacteria  
826 following a spring bloom. *Nature microbiology*, *1*, 1–7. <https://doi.org/10.1038/nmicrobiol.2016.5>
- 827 Neukermans, G., Oziel, L., & Babin, M. (2018). Increased intrusion of warming Atlantic waters leads to rapid  
828 expansion of temperate phytoplankton in the Arctic. *Global Change Biology*, 1–9. [https://doi.org/10.](https://doi.org/10.1111/gcb.14075)  
829 [1111/gcb.14075](https://doi.org/10.1111/gcb.14075)
- 830 Niemi, A., Michel, C., Hille, K., & Poulin, M. (2011). Protist assemblages in winter sea ice: setting the stage for  
831 the spring ice algal bloom. *Polar Biology*, *34*, 1803–1817. <https://doi.org/10.1007/s00300-011-1059-1>

- 832 Not, F., Massana, R., Latasa, M., Marie, D., Pedro, C., Vaultot, D., & Simon, N. (2005). Late summer com-  
833 munity composition and abundance of photosynthetic picoeukaryotes in Norwegian and Barents Seas.  
834 *Limnology and Oceanography*, *50*, 1677–1686.
- 835 Olsen, L. M., Laney, S. R., Duarte, P., Kauko, H. M., Fernández-méndez, M., Mundy, C. J., Rösel, A., Meyer,  
836 A., Itkin, P., Cohen, L., Peeken, I., Tatarek, A., Rózańska-Pluta, M., Wiktor, J., Taskjelle, T., Pavlov,  
837 A. K., Hudson, S. R., Granskog, M. A., Hop, H., & Assmy, P. (2017). The seeding of ice algal blooms  
838 in Arctic pack ice: The multiyear ice seed repository hypothesis. *Journal of Geophysical Research:*  
839 *Biogeosciences*, *122*, 1529–1548. <https://doi.org/10.1002/2016JG003668>
- 840 Oziel, L., Baudena, A., Ardyna, M., Massicotte, P., Randelhoff, A., Sallée, J. B., Ingvaldsen, R. B., Devred, E.,  
841 & Babin, M. (2020). Faster Atlantic currents drive poleward expansion of temperate phytoplankton in  
842 the Arctic Ocean. *Nature Communications*, *11*. <https://doi.org/10.1038/s41467-020-15485-5>
- 843 Oziel, L., Massicotte, P., Randelhoff, A., Ferland, J., Vladioiu, A., Lacour, L., Galindo, V., Lambert-Girard, S.,  
844 Dumont, D., Cuypers, Y., Bouruet-Aubertot, P., Mundy, C.-J., Ehn, J., Bécu, G., Marec, C., Forget,  
845 M.-H., Garcia, N., Coupel, P., Raimbault, P., ... Babin, M. (2019). Environmental factors influencing  
846 the seasonal dynamics of spring algal blooms in and beneath sea ice in western Baffin Bay. *Elementa:*  
847 *Science of the Anthropocene*, *7*, 34. <https://doi.org/10.1525/elementa.372>
- 848 Perrette, M., Yool, A., Quartly, G. D., & Popova, E. E. (2011). Near-ubiquity of ice-edge blooms in the Arctic.  
849 *Biogeosciences*, *8*, 515–524. <https://doi.org/10.5194/bg-8-515-2011>
- 850 Piredda, R., Tomasino, M. P., D’Erchia, A. M., Manzari, C., Pesole, G., Montresor, M., Kooistra, W. H.,  
851 Sarno, D., & Zingone, A. (2017). Diversity and temporal patterns of planktonic protist assemblages  
852 at a Mediterranean Long Term Ecological Research site. *FEMS Microbiology Ecology*, *93*, 1–14. <https://doi.org/10.1093/femsec/fiw200>
- 853
- 854 Polyakov, I. V., Pnyushkov, A. V., Alkire, M. B., Ashik, I. M., Baumann, T. M., Carmack, E. C., Goszczko, I.,  
855 Guthrie, J., Ivanov, V. V., Kanzow, T., Krishfield, R., Kwok, R., Sundfjord, A., Morison, J., Rember,  
856 R., & Yulin, A. (2017). Greater role for Atlantic inflows on sea-ice loss in the Eurasian Basin of the  
857 Arctic Ocean. *Science*, *356*, 285–291. <https://doi.org/10.1126/science.aai8204>
- 858 Post, E., Bhatt, U. S., Bitz, C. M., Brodie, J. F., Fulton, T. L., Hebblewhite, M., Kerby, J., Kutz, S. J.,  
859 Stirling, I., & Walker, D. A. (2013). Ecological consequences of sea-ice decline. *Science*, *341*, 519–524.  
860 <https://doi.org/10.1126/science.1235225>
- 861 Poulin, M., Daugbjerg, N., & Gradinger, R. (2011). The pan-Arctic biodiversity of marine pelagic and sea-ice  
862 unicellular eukaryotes : a first-attempt assessment, 13–28. <https://doi.org/10.1007/s12526-010-0058-8>
- 863 Poulin, M., Underwood, G. J., & Michel, C. (2014). Sub-ice colonial *Melosira arctica* in Arctic first-year ice.  
864 *Diatom Research*, *29*, 213–221. <https://doi.org/10.1080/0269249X.2013.877085>
- 865 R Core Team. (2021). *R: A language and environment for statistical computing*. R Foundation for Statistical  
866 Computing. Vienna, Austria. <https://www.R-project.org/>

- 867 Randelhoff, A., Oziel, L., Massicotte, P., Bécu, G., Lacour, L., Dumont, D., Vladoiu, A., Marec, C., Bruyant,  
868 F., Houssais, M.-N., Tremblay, J.-é., Deslongchamps, G., & Babin, M. (2019). The evolution of light  
869 and vertical mixing across a phytoplankton ice-edge bloom. *Elementa: Science of the Anthropocene*, *7*,  
870 1–19.
- 871 Renaut, S., Devred, E., & Babin, M. (2018). Northward Expansion and Intensification of Phytoplankton Growth  
872 During the Early Ice-Free Season in Arctic. *Geophysical Research Letters*, *45*, 10, 590–10, 598. <https://doi.org/10.1029/2018GL078995>  
873
- 874 Ribeiro, C. G., Lopes, A., Gourvil, P., Gall, F. L., Marie, D., Tragin, M., Probert, I., & Vaulot, D. (2020). Cultur-  
875 able diversity of Arctic phytoplankton during pack ice melting. *Elementa: Science of the Anthropocene*,  
876 *8*.
- 877 Saint-Béat, B., Fath, B. D., Aubry, C., Colombet, J., Dinasquet, J., Fortier, L., Galindo, V., Grondin, P.-L., Joux,  
878 F., Lalande, C., LeBlanc, M., Raimbault, P., Sime-Ngando, T., Tremblay, J.-E., Vaulot, D., Maps, F.,  
879 Babin, M., Deming, J. W., & Bowman, J. (2020). Contrasting pelagic ecosystem functioning in eastern  
880 and western Baffin Bay revealed by trophic network modeling. *Elementa: Science of the Anthropocene*,  
881 *8*, 1–24. <https://doi.org/10.1525/elementa.397>
- 882 Sakshaug, E. (2004). Primary and Secondary Production in the Arctic Seas, In *The organic carbon cycle in the*  
883 *arctic ocean*. Berlin. [https://doi.org/10.1007/978-3-642-18912-8\\_3](https://doi.org/10.1007/978-3-642-18912-8_3)
- 884 Schiffrine, N., Tremblay, J. É., & Babin, M. (2020). Growth and Elemental Stoichiometry of the Ecologically-  
885 Relevant Arctic Diatom *Chaetoceros gelidus*: A Mix of Polar and Temperate. *Frontiers in Marine*  
886 *Science*, *6*, 1–15. <https://doi.org/10.3389/fmars.2019.00790>
- 887 Schmidt, K., Brown, T., Belt, S., Ireland, L., Taylor, K. W., Thorpe, S., Ward, P., & Atkinson, A. (2018). Do  
888 pelagic grazers benefit from sea ice? Insights from the Antarctic sea ice proxy IPSO25. *Biogeosciences*,  
889 *15*, 1987–2006. <https://doi.org/10.5194/bg-15-1987-2018>
- 890 Schoemann, V., Becquevort, S., Stefels, J., Rousseau, V., & Lancelot, C. (2005). *PHAEOCYSTIS* BLOOMS  
891 IN THE GLOBAL OCEAN AND THEIR CONTROLLING MECHANISMS: A REVIEW. *Journal of*  
892 *Sea Research*, *53*, 43–66. <https://doi.org/10.1016/j.seares.2004.01.008>
- 893 Serreze, M. C., Holland, M. M., & Stroeve, J. (2007). Perspectives on the Arctic's shrinking sea-ice cover.  
894 *Science*, *315*, 1533–1536. <https://doi.org/10.1126/science.1139426>
- 895 Simon, N., Foulon, E., Grulois, D., Six, C., Desdevises, Y., Latimier, M., Le Gall, F., Tragin, M., Houdan, A.,  
896 Derelle, E., Jouenne, F., Marie, D., Le Panse, S., Vaulot, D., & Marin, B. (2017). Revision of the genus  
897 *Micromonas* Manton et Parke (Chlorophyta, Mamiellophyceae), of the type species *M. pusilla* (Butcher)  
898 Manton & Parke and of the species *M. commoda* van Baren, Bachy and Worden and description of two  
899 new species based on the genetic and phenotypic characterization of cultured isolates. *Protist*, *168*,  
900 612–635. <https://doi.org/10.1016/j.protis.2017.09.002>
- 901 Sjöqvist, C. O., & Kremp, A. (2016). Genetic diversity affects ecological performance and stress response of  
902 marine diatom populations. *ISME Journal*, *10*, 2755–2766. <https://doi.org/10.1038/ismej.2016.44>

- 903 Smyth, T. J., Tyrell, T., & Tarrant, B. (2004). Time series of coccolithophore activity in the Barents Sea, from  
904 twenty years of satellite imagery. *Geophysical Research Letters*, *31*, 2–5. [https://doi.org/10.1029/  
905 2004GL019735](https://doi.org/10.1029/2004GL019735)
- 906 Stroeve, J., Markus, T., Boisvert, L., Miller, J., & Barret, A. (2014). Changes in Arctic melt season and  
907 implications for sea ice loss. *Geophysical Research Letters*, *41*, 1216–1225. [https://doi.org/10.1002/  
908 2013GL058951](https://doi.org/10.1002/2013GL058951).Received
- 909 Tang, C. C., Ross, C. K., Yao, T., Petrie, B., DeTracey, B. M., & Dunlap, E. (2004). The circulation, water  
910 masses and sea-ice of Baffin Bay. *Progress in Oceanography*, *63*, 183–228. [https://doi.org/10.1016/j.  
911 pocean.2004.09.005](https://doi.org/10.1016/j.pocean.2004.09.005)
- 912 Tedesco, L., Vichi, M., & Scoccimarro, E. (2019). Sea-ice algal phenology in a warmer Arctic. *Science Advances*,  
913 *5*. <https://doi.org/10.1126/sciadv.aav4830>
- 914 Tragin, M., & Vaultot, D. (2019). Novel diversity within marine Mamiellophyceae (Chlorophyta) unveiled by  
915 metabarcoding. *Scientific Reports*, *9*, 1–14. <https://doi.org/10.1038/s41598-019-41680-6>
- 916 Trefault, N., De la Iglesia, R., Moreno-Pino, M., Lopes dos Santos, A., G erikas Ribeiro, C., Parada-Pozo, G.,  
917 Cristi, A., Marie, D., & Vaultot, D. (2021). Annual phytoplankton dynamics in coastal waters from  
918 Fildes Bay, Western Antarctic Peninsula. *Scientific Reports*, *11*, 1–16. [https://doi.org/10.1038-  
919 020-80568-8](https://doi.org/10.1038/s41598-020-80568-8)
- 920 Vader, A., Marquardt, M., Meshram, A. R., & Gabrielsen, T. M. (2015). Key Arctic phototrophs are widespread  
921 in the polar night. *Polar Biology*, *38*, 13–21. <https://doi.org/10.1007/s00300-014-1570-2>
- 922 Vaultot, D., Sim, C. W. H., Denise, W., Teo, B., Biwer, C., Jamy, M., & Lopes dos Santos, A. (2022). metaPR  
923 2 : a database of eukaryotic 18S rRNA metabarcodes with an emphasis on protists. *bioRxiv, preprint*,  
924 1–16.
- 925 Verity, P. G., Brussaard, C. P., Nejstgaard, J. C., Van Leeuwe, M. A., Lancelot, C., & Medlin, L. K. (2007).  
926 Current understanding of Phaeocystis ecology and biogeochemistry, and perspectives for future research.  
927 *Biogeochemistry*, *83*, 311–330. [https://doi.org/10.1007/978-1-4020-6214-8\\_21](https://doi.org/10.1007/978-1-4020-6214-8_21)
- 928 Vilgrain, L., Maps, F., Picheral, M., Babin, M., Aubry, C., Irisson, J. O., & Ayata, S. D. (2021). Trait-based  
929 approach using in situ copepod images reveals contrasting ecological patterns across an Arctic ice melt  
930 zone. *Limnology and Oceanography*, *66*, 1155–1167. <https://doi.org/10.1002/lno.11672>
- 931 Wassmann, P., Reigstad, M., Haug, T., Rudels, B., Carroll, M. L., Hop, H., Gabrielsen, G. W., Falk-Petersen,  
932 S., Denisenko, S. G., Arashkevich, E., Slagstad, D., & Pavlova, O. (2006). Food webs and carbon flux in  
933 the Barents Sea. *Progress in Oceanography*, *71*, 232–287. <https://doi.org/10.1016/j.pocean.2006.10.003>
- 934 Wickham, H. (2016). *Ggplot2: Elegant graphics for data analysis*. <https://ggplot2.tidyverse.org>
- 935 Wickham, H., Averick, M., Bryan, J., Chang, W., McGowan, L. D., Fran ois, R., Grolemund, G., Hayes, A.,  
936 Henry, L., Hester, J., Kuhn, M., Pedersen, T. L., Miller, E., Bache, S. M., M uller, K., Ooms, J.,  
937 Robinson, D., Seidel, D. P., Spinu, V., ... Yutani, H. (2019). Welcome to the tidyverse. *Journal of Open  
938 Source Software*, *4*, 1686. <https://doi.org/10.21105/joss.01686>

- 939 Xu, D., Kong, H., Yang, E.-j., Li, X., Jiao, N., Warren, A., Wang, Y., Lee, Y., Jung, J., & Kang, S.-h. (2020).  
940 Contrasting Community Composition of Active Microbial Eukaryotes in Melt Ponds and Sea Water  
941 of the Arctic Ocean Revealed by High Throughput Sequencing. *Frontiers in Microbiology*, *11*, 1–15.  
942 <https://doi.org/10.3389/fmicb.2020.01170>
- 943 Zingone, A., Chrétiennot-Dinet, M. J., Lange, M., & Medlin, L. (1999). Morphological and genetic characteriza-  
944 tion of *Phaeocystis cordata* and *P. jahnii* (Prymnesiophyceae), two new species from the Mediterranean  
945 Sea. *Journal of Phycology*, *35*, 1322–1337. <https://doi.org/10.1046/j.1529-8817.1999.3561322.x>
- 946 Zweng, M. M., & Münchow, A. (2006). Warming and freshening of Baffin Bay, 1916-2003. *Journal of Geophysical*  
947 *Research: Oceans*, *111*, 1–13. <https://doi.org/10.1029/2005JC003093>

## 948 List of Tables

949 Table. 1 Stations with their geographical coordinates, julian day, the sectors where it belongs (under  
950 ice, marginal ice zone or open water), the percentage of ice cover and how many days it  
951 has been ice free upon sampling, and size fractions analyzed.

952 Table. 2 Number of samples within each sector for each size fraction.

953 Table. 3 Number of ASVs by phytoplankton genera present in each sector; only genera with more  
954 than 2 ASVs in the whole dataset were taken into account. Note that taxa not assigned to  
955 the genus level might contain more than one genus.

956 Table. 4 Indicator ASVs with their taxonomic assignation for each sector or group of sectors, divided  
957 by size fraction. "A" represents the positive predictive power of the ASV, or the probability  
958 of a sampling site being a member of the sector or group of sectors when the ASV appears  
959 in that site. "B" represents how often one ASV is found in sampling sites of the sector or  
960 group of sectors. The value of the correlation (stat) and the statistical significance of the  
961 association ( $p$ -value) are also shown.

962 Table. S1 List of variables measured during the Green Edge cruise (see Data Set S1).



## 963 List of Figures

- 964 Fig. 1 Location of the sampling stations in Baffin Bay and environmental variables. (A) Sampling  
965 stations indicating the sea-ice concentration (%); the red arrow represents the warmer West  
966 Greenland Current, and the blue arrow represents the Pacific-originated Baffin Current;  
967 (B) Temperature ( $^{\circ}\text{C}$ ) in surface; (C) Depth of the nitracline (meters); (D) Open Water  
968 Days: amount of days of open water before (positive values) or after (negative values) the  
969 sampling day; (E) Nitrate concentration in surface ( $\mu\text{M}$ ). A dashed line separates sampling  
970 stations with more (east) and less (west) than 80% sea-ice cover.
- 971 Fig. 2 Environmental variables for the three sectors: UI (gray), MIZ (yellow) and OW (blue);  
972 (A) temperature ( $^{\circ}\text{C}$ ); (B) salinity; (C) fluorescence; (D) mixed layer depth (m); (E)  
973 Photosynthetically Active Radiation at 3 m ( $\text{mol photons}\cdot\text{m}^{-2}\cdot\text{d}^{-1}$ ); (F) nitracline depth  
974 (m); (G) pico-phytoplankton abundance ( $\text{cells}\cdot\text{mL}^{-1}$ ); (H) nano-phytoplankton abundance  
975 ( $\text{cells}\cdot\text{mL}^{-1}$ ); (I) Cryptophyceae abundance ( $\text{cells}\cdot\text{mL}^{-1}$ ). Number of asterisks represent  
976  $p$ -value obtained with the Wilcox test as follows: (\*)  $p \leq 0.05$ ; (\*\*)  $p \leq 0.01$ ; (\*\*\*)  $p$   
977  $\leq 0.001$ ; (\*\*\*\*)  $p \leq 0.0001$ ; “ns” = not significant.
- 978 Fig. 3 Abundance ( $\text{cells}\cdot\text{mL}^{-1}$ ) measured by FCM of pico-phytoplankton (top panels), nano-  
979 phytoplankton (middle panels) and Cryptophyceae (lower panels) according to depth, di-  
980 vided between the three sectors: UI (gray), MIZ (yellow) and OW (blue).
- 981 Fig. 4 Relative abundance of reads at the genus level between sectors and size fractions. UI:  
982 Under Ice; MIZ: Marginal Ice Zone; OW: Open Water; letters on the y-axis refer to the  
983 depth level where “a” corresponds to the surface and “f” to the deepest sample depth,  
984 usually between 40 m and 60 m depth.
- 985 Fig. 5 Non-metric multidimensional scaling (NMDS) analysis using Bray-Curtis dissimilarities of  
986 the phytoplankton community composition; only statistically significant (A) environmen-  
987 tal parameters ( $p$ -value = 0.001) and (B) genera ( $p$ -value = 0.05) were plotted against  
988 ordination. Parameters: ammonium assimilation (NH4\_assimilation), bacteria abundance  
989 (bact\_ml), Cryptophyceae abundance (crypto\_ml), fluorescence (fluo), nano-phytoplankton  
990 abundance (nano\_ml), nitrates, silica, particulate organic carbon (poc), particulate organic  
991 nitrogen (pon), phosphate, salinity, temperature, urea, and urea assimilation (urea\_assim-  
992 ilation). Stress: 0.11.

- 993 Fig. 6 Taxa distribution of the most abundant ASVs for each sector, divided by sampling stations;  
994 the top 10 ASVs were selected within Chlorophyta (green), Cryptophyta (orange), Hapto-  
995 phyta (blue), and the top 20 most abundant within the highly diverse Ochrophyta division  
996 (red); symbols indicate if a given ASV was reported as indicator ASV for UI (triangles),  
997 MIZ (inverted triangles), OW (squares), MIZ+UI (diamonds) or MIZ+OW (circles) sector  
998 groups within 0.2-3  $\mu\text{m}$  (white), 3-20  $\mu\text{m}$  (grey) or > 20  $\mu\text{m}$  (black) size fractions; asterisks  
999 indicate the  $p$ -values associated with the indicator ASV: 0 (\*\*\*), 0.001 (\*\*), and 0.01 (\*);  
1000 red and blue stars indicate if a given ASV was found exclusively in ice-associated sectors,  
1001 being blue stars not abundant ASVs; SIC = sea-ice concentration on each sampling station.
- 1002 Fig. S1 Nutrients for the three sectors: UI (grey), MIZ (yellow) and OW (blue); (A) nitrates ( $\mu\text{M}$ );  
1003 (B) nitrites ( $\mu\text{M}$ ); (C) phosphates ( $\mu\text{M}$ ); (D) orthosilicic acid ( $\mu\text{M}$ ); (E) colored dissolved  
1004 organic matter ( $\text{mg.m}^3$ ); (F) dissolved organic carbon ( $\mu\text{M}$ ); (G) phosphate to nitrate ratio;  
1005 (H) nitrate to orthosilicic acid ratio; (I) nitrate to phosphate ratio. Number of asterisks  
1006 represent  $p$ -value obtained with the Wilcox test as follows: (\*)  $p \leq 0.05$ ; (\*\*)  $p \leq 0.01$ ;  
1007 (\*\*\*)  $p \leq 0.001$ ; (\*\*\*\*)  $p \leq 0.0001$ ; “ns” = not significant.
- 1008 Fig. S2 Nutrients and metabolic rates for the three sectors: UI (grey), MIZ (yellow) and OW (blue);  
1009 (A) urea ( $\mu\text{M}$ ); (B) ammonium ( $\mu\text{M}$ ); (C) dissolved organic nitrogen ( $\mu\text{M}$ ); (D) particulate  
1010 organic nitrogen ( $\mu\text{M}$ ); (E) particulate organic carbon ( $\text{mg.m}^3$ ); (F) nitrification ( $\mu\text{M}$ ); (G)  
1011 ammonium assimilation ( $\text{nM.L}^{-1}.\text{day}^{-1}$ ); (H) ammonium regeneration ( $\text{nM.L}^{-1}.\text{day}^{-1}$ );  
1012 (I) urea assimilation ( $\text{nM.L}^{-1}.\text{day}^{-1}$ ); (J) nitrate assimilation; (K) dissolved organic nitro-  
1013 gen ( $\mu\text{M}$ ); (L) primary production ( $\mu\text{gC.L}^{-1}.\text{day}^{-1}$ ). Number of asterisks represent  $p$ -value  
1014 obtained with the Wilcox test as follows: (\*)  $p \leq 0.05$ ; (\*\*)  $p \leq 0.01$ ; (\*\*\*)  $p \leq 0.001$ ;  
1015 (\*\*\*\*)  $p \leq 0.0001$ ; “ns” = not significant.
- 1016 Fig. S3 Relative abundance of reads at the division level between sectors and size fractions. UI:  
1017 Under Ice; MIZ: Marginal Ice Zone; OW: Open Water; letters on the y-axis refer to the  
1018 depth level where “a” corresponds to the surface and “f” to the deepest sampled depth,  
1019 usually between 40 m and 60 m.
- 1020 Fig. S4 Chao1, Shannon and Simpson alpha diversity indices divided by size fraction; sectors are  
1021 represented by the colors grey (UI), yellow (MIZ) and blue (OW).
- 1022 Fig. S5 Number of ASVs from the abundant community exclusive from or shared between the  
1023 sectors UI (under ice), MIZ (marginal ice-zone), and OW (open water); colors represent the  
1024 class from each ASV; read abundance (in log10) is displayed at the top of each intersection;  
1025 the names and assignments of the ASVs exclusive from ice-associated sectors are shown in  
1026 grey panels.
- 1027 Fig. S6 Sequence alignment of the 18S rRNA of *Micromonas* ASVs showing two *M. polaris* ASVs  
1028 with a single nucleotide difference, and a *M. commoda* A2 ASV.

1029 Fig. S7 Partial snapshot of *M. polaris* ASV\_0003 (top panel) and ASV\_0154 (lower panel) distri-  
1030 bution in the metaPR<sup>2</sup> database showing 100% similar reads from other studies. Colors  
1031 indicate different sampling campaigns within metaPR<sup>2</sup>. Size of bubbles represent the per-  
1032 centage in relation to other eukaryotes within each station. Note that maximum percent-  
1033 ages are distinct between panels to compensate for the lower abundance of ASV\_0154.

1034 Fig. S8 Partial snapshot of *Thalassiosira* ASV\_0013 (top panel), ASV\_0057 (middle panel), and  
1035 ASV\_0071 (lower panel) distribution in the metaPR<sup>2</sup> database showing 100% similar reads  
1036 from other studies. Colors indicate different sampling campaigns within metaPR<sup>2</sup>. Size  
1037 of bubbles represent the percentage in relation to other eukaryotes within each station.  
1038 Note that maximum percentages are distinct between panels. The approximate region of  
1039 sampling from the present study is marked by a red square.

1040 **Tables**

**Table 1:** Stations with their geographical coordinates, julian day, the sectors where it belongs (under ice, marginal ice zone or open water), the percentage of ice cover and how many days it has been ice free upon sampling, and size fractions analyzed.

| Station | Longitude | Latitude | Day | Sector | Ice(%) | OWD | Size fractions |
|---------|-----------|----------|-----|--------|--------|-----|----------------|
| G100    | -56.8     | 68.5     | 161 | OW     | 0      | 12  | 0.2/20         |
| G102    | -57.5     | 68.5     | 162 | OW     | 0      | 12  | 0.2/20         |
| G107    | -59.3     | 68.5     | 163 | UI     | 100    | -19 | 0.2/20         |
| G110    | -60.1     | 68.5     | 164 | UI     | 100    | -25 | 0.2/3/20       |
| G115    | -61.4     | 68.4     | 165 | UI     | 93     | -27 | 0.2/3/20       |
| G201    | -59.9     | 68.6     | 166 | UI     | 99     | -21 | 0.2/3/20       |
| G204    | -59.3     | 68.7     | 167 | UI     | 93     | -14 | 0.2/3/20       |
| G207    | -58.5     | 68.8     | 168 | MIZ    | 41     | 2   | 0.2/3/20       |
| G300    | -56.8     | 69       | 169 | OW     | 0      | 26  | 0.2/3/20       |
| G309    | -58.7     | 69       | 170 | MIZ    | 0      | 2   | 0.2/3/20       |
| G312    | -59.6     | 69       | 171 | MIZ    | 100    | -10 | 0.2/3/20       |
| G318    | -61       | 69       | 172 | UI     | 99     | -15 | 0.2/3/20       |
| G324    | -62.3     | 69       | 173 | UI     | 100    | -23 | 0.2/3/20       |
| G507    | -59.1     | 70       | 182 | MIZ    | 0      | 3   | 3/20           |
| G512    | -60.4     | 70       | 183 | MIZ    | 0      | 2   | 3/20           |
| G519    | -62.4     | 70       | 184 | MIZ    | 84     | -3  | 3/20           |

**Table 2:** Number of samples within each sector for each size fraction.

| Sector | 0.2-3 $\mu\text{m}$ | 3-20 $\mu\text{m}$ | > 20 $\mu\text{m}$ |
|--------|---------------------|--------------------|--------------------|
| UI     | 40                  | 35                 | 40                 |
| MIZ    | 18                  | 28                 | 34                 |
| OW     | 16                  | 5                  | 18                 |

**Table 3:** Number of ASVs by phytoplankton genera present in each sector; only genera with more than 2 ASVs in the whole dataset were taken into account. Note that taxa not assigned to the genus level might contain more than one genus.

| Class                 | Genus                     | UI | MIZ | OW | Total |
|-----------------------|---------------------------|----|-----|----|-------|
| Bacillariophyta       | <i>Bacillaria</i>         | 7  | 7   | 3  | 9     |
| Bacillariophyta       | <i>Chaetoceros</i>        | 19 | 26  | 22 | 35    |
| Bacillariophyta       | <i>Cylindrotheca</i>      | 2  | 3   | 1  | 5     |
| Bacillariophyta       | <i>Ditylum</i>            | 3  | 1   | 0  | 3     |
| Bacillariophyta       | <i>Entomoneis</i>         | 6  | 2   | 1  | 6     |
| Bacillariophyta       | <i>Fragilaria</i>         | 3  | 3   | 1  | 3     |
| Bacillariophyta       | <i>Fragilariopsis</i>     | 3  | 3   | 2  | 3     |
| Bacillariophyta       | <i>Melosira</i>           | 3  | 4   | 1  | 5     |
| Bacillariophyta       | <i>Navicula</i>           | 3  | 2   | 2  | 3     |
| Bacillariophyta       | Naviculales               | 5  | 2   | 1  | 5     |
| Bacillariophyta       | <i>Pleurosigma</i>        | 3  | 1   | 0  | 3     |
| Bacillariophyta       | <i>Pseudogomphonema</i>   | 3  | 1   | 0  | 3     |
| Bacillariophyta       | <i>Pseudo-nitzschia</i>   | 2  | 4   | 1  | 6     |
| Bacillariophyta       | Raphid-pennate X          | 6  | 6   | 0  | 6     |
| Bacillariophyta       | <i>Stauroneis</i>         | 2  | 3   | 0  | 3     |
| Bolidophyceae         | Parmales env 1 X          | 4  | 3   | 1  | 5     |
| Bolidophyceae         | Parmales env 2 X          | 5  | 1   | 0  | 6     |
| Bolidophyceae         | Parmales env 3 X          | 2  | 1   | 0  | 3     |
| Bolidophyceae         | <i>Triparma</i>           | 3  | 3   | 2  | 6     |
| Cryptophyceae         | <i>Falcomonas</i>         | 5  | 3   | 1  | 5     |
| Cryptophyceae         | Goniomonadales XX         | 3  | 0   | 1  | 4     |
| Cryptophyceae         | <i>Plagioselmis</i>       | 1  | 3   | 1  | 3     |
| Cryptophyceae         | <i>Rhodomonas</i>         | 3  | 3   | 2  | 4     |
| Cryptophyceae         | <i>Teleaulax</i>          | 3  | 1   | 1  | 3     |
| Dictyochophyceae      | <i>Pseudochattonella</i>  | 6  | 4   | 1  | 6     |
| Haptophyta Clade HAP4 | Haptophyta Clade HAP4 XXX | 3  | 0   | 0  | 3     |
| Haptophyta X          | Haptophyta XXXX           | 3  | 2   | 0  | 3     |
| Mamiellophyceae       | Dolichomastigaceae-B      | 14 | 12  | 11 | 29    |
| Mamiellophyceae       | <i>Micromonas</i>         | 5  | 6   | 3  | 7     |
| MOCH-1                | MOCH-1 XXX                | 3  | 1   | 0  | 3     |
| MOCH-2                | MOCH-2 XXX                | 5  | 4   | 0  | 6     |

**Table 3:** (continued)

| Class               | Genus               | UI | MIZ | OW | Total |
|---------------------|---------------------|----|-----|----|-------|
| Pyramimonadophyceae | Pyramimonadales XXX | 4  | 4   | 2  | 4     |
| Pyramimonadophyceae | <i>Pterosperma</i>  | 3  | 1   | 1  | 4     |
| Pyramimonadophyceae | <i>Pyramimonas</i>  | 7  | 6   | 3  | 8     |

**Table 4:** Indicator ASVs with their taxonomic assignation for each sector or group of sectors, divided by size fraction. "A" represents the positive predictive power of the ASV, or the probability of a sampling site being a member of the sector or group of sectors when the ASV appears in that site. "B" represents how often one ASV is found in sampling sites of the sector or group of sectors. The value of the correlation (stat) and the statistical significance of the association (*p*-value) are also shown.

| Size fraction | Sectors | ASVs          | Class                 | Species                         | A    | B    | Stat | p.value | Sign |
|---------------|---------|---------------|-----------------------|---------------------------------|------|------|------|---------|------|
| 0.2-3 μm      | UI      | asv_023_00009 | Bacillariophyta       | Melosira arctica                | 0.98 | 0.7  | 0.83 | 1e-04   | ***  |
| 0.2-3 μm      | UI      | asv_023_00015 | Bacillariophyta       | Fragilariopsis cylindrus        | 0.93 | 0.75 | 0.83 | 1e-04   | ***  |
| 0.2-3 μm      | UI      | asv_023_00104 | Mamiellophyceae       | Mantoniella squamata            | 1    | 0.48 | 0.69 | 2e-04   | ***  |
| 0.2-3 μm      | UI      | asv_023_00125 | Prymnesiophyceae      | Phaeocystis sp.                 | 0.93 | 0.75 | 0.84 | 1e-04   | ***  |
| 0.2-3 μm      | UI      | asv_023_00171 | Bacillariophyta       | Bacillaria paxillifer           | 0.97 | 0.68 | 0.81 | 1e-04   | ***  |
| 0.2-3 μm      | UI      | asv_023_00244 | Pyramimonadales       | Pterosperma sp.                 | 1    | 0.42 | 0.65 | 5e-04   | ***  |
| 0.2-3 μm      | UI      | asv_023_00311 | Pelagophyceae         | Ankylochrysis sp.               | 0.96 | 0.48 | 0.67 | 4e-04   | ***  |
| 0.2-3 μm      | UI      | asv_023_00384 | Mamiellophyceae       | Dolichomastigaceae-B sp.        | 1    | 0.32 | 0.57 | 0.0031  | **   |
| 0.2-3 μm      | UI      | asv_023_00239 | Prymnesiophyceae      | Chrysochromulina sp.            | 1    | 0.22 | 0.47 | 0.0189  | *    |
| 0.2-3 μm      | UI      | asv_023_00381 | Haptophyta_Clade_HAP4 | Haptophyta Clade HAP4 XXX sp.   | 1    | 0.28 | 0.52 | 0.0107  | *    |
| 0.2-3 μm      | MIZ     | asv_023_00008 | Bacillariophyta       | Thalassiosira antarctica        | 0.52 | 0.78 | 0.63 | 0.0186  | *    |
| 0.2-3 μm      | MIZ     | asv_023_00049 | Bacillariophyta       | Navicula sp.                    | 0.74 | 0.39 | 0.54 | 0.0067  | **   |
| 0.2-3 μm      | OW      | asv_023_00421 | Mamiellophyceae       | Dolichomastigaceae-B sp.        | 0.89 | 0.44 | 0.62 | 2e-04   | ***  |
| 0.2-3 μm      | OW      | asv_023_00469 | Dictyochophyceae      | Pedinellales X sp.              | 0.98 | 0.81 | 0.89 | 1e-04   | ***  |
| 0.2-3 μm      | OW      | asv_023_00593 | Dictyochophyceae      | Pedinellales X sp.              | 1    | 0.5  | 0.71 | 1e-04   | ***  |
| 0.2-3 μm      | OW      | asv_023_00731 | Dictyochophyceae      | Pedinellales X sp.              | 1    | 0.31 | 0.56 | 3e-04   | ***  |
| 0.2-3 μm      | OW      | asv_023_00223 | Prymnesiophyceae      | Prymnesiophyceae Clade F XX sp. | 0.89 | 0.19 | 0.41 | 0.0149  | *    |
| 0.2-3 μm      | OW      | asv_023_00949 | Mamiellophyceae       | Dolichomastigaceae-B sp.        | 1    | 0.12 | 0.35 | 0.0447  | *    |
| 0.2-3 μm      | MIZ+UI  | asv_023_00086 | Prymnesiophyceae      | Chrysochromulina sp.            | 1    | 0.33 | 0.57 | 0.0262  | *    |
| 0.2-3 μm      | MIZ+UI  | asv_023_00041 | Cryptophyceae         | Falcomonas daucoides            | 0.95 | 0.91 | 0.93 | 1e-04   | ***  |
| 0.2-3 μm      | MIZ+UI  | asv_023_00046 | Bacillariophyta       | Pseudo-nitzschia seriata        | 1    | 0.59 | 0.77 | 2e-04   | ***  |
| 0.2-3 μm      | MIZ+UI  | asv_023_00048 | Bacillariophyta       | Chaetoceros neogracilis         | 0.97 | 0.79 | 0.88 | 1e-04   | ***  |
| 0.2-3 μm      | MIZ+UI  | asv_023_00055 | Cryptophyceae         | Falcomonas daucoides            | 1    | 0.57 | 0.75 | 8e-04   | ***  |
| 0.2-3 μm      | MIZ+UI  | asv_023_00061 | MOCH-2                | MOCH-2 XXX sp.                  | 1    | 0.78 | 0.88 | 1e-04   | ***  |
| 0.2-3 μm      | MIZ+UI  | asv_023_00073 | Bolidophyceae         | Triparma laevis clade           | 0.97 | 0.76 | 0.86 | 2e-04   | ***  |
| 0.2-3 μm      | MIZ+UI  | asv_023_00075 | Dictyochophyceae      | Dictyocha sp.eculum             | 1    | 0.62 | 0.79 | 2e-04   | ***  |
| 0.2-3 μm      | MIZ+UI  | asv_023_00081 | Mamiellophyceae       | Bathycoccus prasinos            | 0.96 | 0.91 | 0.94 | 1e-04   | ***  |
| 0.2-3 μm      | MIZ+UI  | asv_023_00192 | Prymnesiophyceae      | Haptolina sp.                   | 0.94 | 0.45 | 0.65 | 0.0444  | *    |
| 0.2-3 μm      | MIZ+UI  | asv_023_00105 | Prymnesiophyceae      | Phaeocystis cordata             | 1    | 0.5  | 0.71 | 0.0013  | **   |
| 0.2-3 μm      | MIZ+UI  | asv_023_00114 | Dictyochophyceae      | Florenciellales X sp.           | 0.98 | 0.66 | 0.8  | 2e-04   | ***  |
| 0.2-3 μm      | MIZ+UI  | asv_023_00133 | Pelagophyceae         | Pelagomonas calceolata          | 0.98 | 0.83 | 0.9  | 1e-04   | ***  |
| 0.2-3 μm      | MIZ+UI  | asv_023_00151 | Dictyochophyceae      | Florenciella parvula            | 0.97 | 0.83 | 0.9  | 1e-04   | ***  |
| 0.2-3 μm      | MIZ+UI  | asv_023_00267 | Mamiellophyceae       | Dolichomastigaceae-B sp.        | 1    | 0.29 | 0.54 | 0.0393  | *    |
| 0.2-3 μm      | MIZ+UI  | asv_023_00154 | Mamiellophyceae       | Micromonas polaris              | 1    | 0.48 | 0.7  | 0.0017  | **   |
| 0.2-3 μm      | MIZ+UI  | asv_023_00235 | Mamiellophyceae       | Micromonas commoda A2           | 0.96 | 0.9  | 0.93 | 1e-04   | ***  |
| 0.2-3 μm      | MIZ+UI  | asv_023_00236 | Dictyochophyceae      | Pseudochattonella sp.           | 1    | 0.76 | 0.87 | 1e-04   | ***  |
| 0.2-3 μm      | MIZ+OW  | asv_023_00016 | Bacillariophyta       | Porosira glacialis              | 0.87 | 0.53 | 0.68 | 9e-04   | ***  |
| 0.2-3 μm      | MIZ+OW  | asv_023_00136 | Bacillariophyta       | Chaetoceros decipiens           | 0.91 | 0.88 | 0.9  | 1e-04   | ***  |
| 0.2-3 μm      | MIZ+OW  | asv_023_00247 | Prymnesiophyceae      | Prymnesiophyceae Clade E XX sp. | 0.93 | 0.5  | 0.68 | 5e-04   | ***  |
| 3-20 μm       | UI      | asv_023_00171 | Bacillariophyta       | Bacillaria paxillifer           | 0.94 | 0.6  | 0.75 | 0.0031  | **   |
| 3-20 μm       | UI      | asv_023_00244 | Pyramimonadales       | Pterosperma sp.                 | 1    | 0.49 | 0.7  | 0.0095  | **   |
| 3-20 μm       | UI      | asv_023_00104 | Mamiellophyceae       | Mantoniella squamata            | 0.94 | 0.46 | 0.66 | 0.0175  | *    |
| 3-20 μm       | UI      | asv_023_00281 | Cryptophyceae         | Cryptomonadales XX sp.          | 0.87 | 0.57 | 0.71 | 0.0251  | *    |
| 3-20 μm       | UI      | asv_023_00239 | Prymnesiophyceae      | Chrysochromulina sp.            | 0.94 | 0.4  | 0.61 | 0.0327  | *    |
| 3-20 μm       | UI      | asv_023_00311 | Pelagophyceae         | Ankylochrysis sp.               | 0.86 | 0.46 | 0.63 | 0.0421  | *    |
| 3-20 μm       | MIZ     | asv_023_00064 | Bacillariophyta       | Fragilaria sp.                  | 0.89 | 0.44 | 0.63 | 0.0267  | *    |
| 3-20 μm       | MIZ     | asv_023_00347 | MOCH-2                | MOCH-2 XXX sp.                  | 0.89 | 0.59 | 0.73 | 0.0127  | *    |

Table 4: (continued)

| Size fraction      | Sectors | ASVs          | Class             | Species                         | A    | B    | Stat | p.value | Sign |
|--------------------|---------|---------------|-------------------|---------------------------------|------|------|------|---------|------|
| 3-20 $\mu\text{m}$ | MIZ     | asv_023_00016 | Bacillariophyta   | Porosira glacialis              | 0.82 | 0.74 | 0.78 | 0.0047  | **   |
| 3-20 $\mu\text{m}$ | MIZ     | asv_023_00277 | Bacillariophyta   | Naviculales sp.                 | 0.93 | 0.37 | 0.59 | 0.0488  | *    |
| 3-20 $\mu\text{m}$ | MIZ     | asv_023_00663 | Filosa-Imbricatea | Novel-clade-2 X sp.             | 1    | 0.19 | 0.43 | 0.0438  | *    |
| 3-20 $\mu\text{m}$ | MIZ     | asv_023_00008 | Bacillariophyta   | Thalassiosira antarctica        | 0.77 | 0.74 | 0.76 | 0.0166  | *    |
| 3-20 $\mu\text{m}$ | MIZ     | asv_023_00049 | Bacillariophyta   | Navicula sp.                    | 0.82 | 0.89 | 0.85 | 6e-04   | ***  |
| 3-20 $\mu\text{m}$ | OW      | asv_023_00320 | Bacillariophyta   | Navicula sp.                    | 0.54 | 0.8  | 0.66 | 0.0141  | *    |
| 3-20 $\mu\text{m}$ | OW      | asv_023_00057 | Bacillariophyta   | Thalassiosira sp.               | 0.92 | 0.8  | 0.86 | 1e-04   | ***  |
| 3-20 $\mu\text{m}$ | OW      | asv_023_00177 | Bacillariophyta   | Chaetoceros rostratus           | 0.83 | 1    | 0.91 | 1e-04   | ***  |
| 3-20 $\mu\text{m}$ | MIZ+UI  | asv_023_00009 | Bacillariophyta   | Melosira arctica                | 1    | 0.69 | 0.83 | 0.0045  | **   |
| 3-20 $\mu\text{m}$ | MIZ+UI  | asv_023_00015 | Bacillariophyta   | Fragilariopsis cylindrus        | 1    | 0.98 | 0.99 | 1e-04   | ***  |
| 3-20 $\mu\text{m}$ | MIZ+UI  | asv_023_00041 | Cryptophyceae     | Falcomonas daucoides            | 1    | 0.81 | 0.9  | 8e-04   | ***  |
| 3-20 $\mu\text{m}$ | MIZ+UI  | asv_023_00046 | Bacillariophyta   | Pseudo-nitzschia seriata        | 1    | 0.87 | 0.93 | 2e-04   | ***  |
| 3-20 $\mu\text{m}$ | MIZ+UI  | asv_023_00048 | Bacillariophyta   | Chaetoceros neogracilis         | 0.99 | 0.98 | 0.99 | 1e-04   | ***  |
| 3-20 $\mu\text{m}$ | MIZ+UI  | asv_023_00022 | Bacillariophyta   | Actinocyclus curvatus           | 0.98 | 0.77 | 0.87 | 0.0126  | *    |
| 3-20 $\mu\text{m}$ | MIZ+UI  | asv_023_00099 | Bacillariophyta   | Cylindrotheca closterium        | 1    | 0.65 | 0.8  | 0.0143  | *    |
| 3-20 $\mu\text{m}$ | MIZ+UI  | asv_023_00061 | MOCH-2            | MOCH-2 XXX sp.                  | 1    | 0.94 | 0.97 | 2e-04   | ***  |
| 3-20 $\mu\text{m}$ | MIZ+UI  | asv_023_00073 | Bolidophyceae     | Triparma laevis clade           | 1    | 0.89 | 0.94 | 1e-04   | ***  |
| 3-20 $\mu\text{m}$ | MIZ+UI  | asv_023_00075 | Dictyochophyceae  | Dictyocha speculum              | 1    | 0.79 | 0.89 | 9e-04   | ***  |
| 3-20 $\mu\text{m}$ | MIZ+UI  | asv_023_00109 | Bacillariophyta   | Fragilariopsis sublineata       | 1    | 0.61 | 0.78 | 0.0192  | *    |
| 3-20 $\mu\text{m}$ | MIZ+UI  | asv_023_00003 | Mamiellophyceae   | Micromonas polaris              | 1    | 0.61 | 0.78 | 0.0189  | *    |
| 3-20 $\mu\text{m}$ | MIZ+UI  | asv_023_00114 | Dictyochophyceae  | Florenciellales X sp.           | 1    | 0.73 | 0.85 | 0.0046  | **   |
| 3-20 $\mu\text{m}$ | MIZ+UI  | asv_023_00105 | Prymnesiophyceae  | Phaeocystis cordata             | 1    | 0.58 | 0.76 | 0.0289  | *    |
| 3-20 $\mu\text{m}$ | MIZ+UI  | asv_023_00125 | Prymnesiophyceae  | Phaeocystis sp.                 | 1    | 0.65 | 0.8  | 0.0215  | *    |
| 3-20 $\mu\text{m}$ | MIZ+UI  | asv_023_00149 | Cryptophyceae     | Plagioselmis prolonga           | 0.99 | 0.56 | 0.75 | 0.0364  | *    |
| 3-20 $\mu\text{m}$ | MIZ+OW  | asv_023_00079 | Bacillariophyta   | Eucampia sp.                    | 0.93 | 0.75 | 0.83 | 5e-04   | ***  |
| 3-20 $\mu\text{m}$ | MIZ+OW  | asv_023_00136 | Bacillariophyta   | Chaetoceros decipiens           | 0.92 | 0.78 | 0.85 | 0.0011  | **   |
| 3-20 $\mu\text{m}$ | MIZ+OW  | asv_023_00225 | Pelagophyceae     | Ankylochrysis sp.               | 0.96 | 0.53 | 0.72 | 0.0116  | *    |
| 3-20 $\mu\text{m}$ | MIZ+OW  | asv_023_00283 | Bacillariophyta   | Attheya septentrionalis         | 0.92 | 0.34 | 0.56 | 0.0476  | *    |
| 3-20 $\mu\text{m}$ | MIZ+OW  | asv_023_00218 | Bacillariophyta   | Chaetoceros danicus             | 0.92 | 0.69 | 0.8  | 0.0028  | **   |
| 3-20 $\mu\text{m}$ | MIZ+OW  | asv_023_00223 | Prymnesiophyceae  | Prymnesiophyceae Clade F XX sp. | 0.9  | 0.5  | 0.67 | 0.0302  | *    |
| 3-20 $\mu\text{m}$ | MIZ+OW  | asv_023_00013 | Bacillariophyta   | Thalassiosira rotula            | 0.97 | 0.31 | 0.55 | 0.0398  | *    |
| > 20 $\mu\text{m}$ | UI      | asv_023_00086 | Prymnesiophyceae  | Chrysochromulina sp.            | 0.96 | 0.17 | 0.41 | 0.017   | *    |
| > 20 $\mu\text{m}$ | UI      | asv_023_00046 | Bacillariophyta   | Pseudo-nitzschia seriata        | 0.79 | 0.85 | 0.82 | 1e-04   | ***  |
| > 20 $\mu\text{m}$ | UI      | asv_023_00105 | Prymnesiophyceae  | Phaeocystis cordata             | 0.76 | 0.45 | 0.58 | 0.0019  | **   |
| > 20 $\mu\text{m}$ | MIZ     | asv_023_00259 | Bacillariophyta   | Entomoneis ornata               | 0.83 | 0.62 | 0.72 | 2e-04   | ***  |
| > 20 $\mu\text{m}$ | MIZ     | asv_023_00265 | Bacillariophyta   | Pauliella toeniata              | 0.69 | 0.68 | 0.68 | 0.0046  | **   |
| > 20 $\mu\text{m}$ | OW      | asv_023_00334 | Bacillariophyta   | Chaetoceros contortus           | 0.72 | 0.83 | 0.77 | 1e-04   | ***  |
| > 20 $\mu\text{m}$ | OW      | asv_023_00407 | Bacillariophyta   | Chaetoceros diadema 1           | 0.82 | 0.67 | 0.74 | 1e-04   | ***  |
| > 20 $\mu\text{m}$ | MIZ+UI  | asv_023_00009 | Bacillariophyta   | Melosira arctica                | 1    | 1    | 1    | 1e-04   | ***  |
| > 20 $\mu\text{m}$ | MIZ+UI  | asv_023_00025 | Bacillariophyta   | Melosira arctica                | 1    | 0.81 | 0.9  | 1e-04   | ***  |
| > 20 $\mu\text{m}$ | MIZ+UI  | asv_023_00038 | Cryptophyceae     | Teleaulax gracilis              | 0.97 | 0.51 | 0.71 | 9e-04   | ***  |
| > 20 $\mu\text{m}$ | MIZ+UI  | asv_023_00049 | Bacillariophyta   | Navicula sp.                    | 0.97 | 0.84 | 0.9  | 1e-04   | ***  |
| > 20 $\mu\text{m}$ | MIZ+UI  | asv_023_00064 | Bacillariophyta   | Fragilaria sp.                  | 0.98 | 0.73 | 0.84 | 1e-04   | ***  |
| > 20 $\mu\text{m}$ | MIZ+UI  | asv_023_00073 | Bolidophyceae     | Triparma laevis clade           | 0.99 | 0.61 | 0.78 | 1e-04   | ***  |
| > 20 $\mu\text{m}$ | MIZ+UI  | asv_023_00075 | Dictyochophyceae  | Dictyocha speculum              | 1    | 0.8  | 0.89 | 1e-04   | ***  |
| > 20 $\mu\text{m}$ | MIZ+UI  | asv_023_00084 | Bacillariophyta   | Raphid-pennate X sp.            | 1    | 0.81 | 0.9  | 1e-04   | ***  |
| > 20 $\mu\text{m}$ | MIZ+UI  | asv_023_00099 | Bacillariophyta   | Cylindrotheca closterium        | 1    | 0.57 | 0.75 | 1e-04   | ***  |
| > 20 $\mu\text{m}$ | MIZ+UI  | asv_023_00178 | Bacillariophyta   | Raphid-pennate X sp.            | 1    | 0.31 | 0.56 | 0.0124  | *    |
| > 20 $\mu\text{m}$ | MIZ+UI  | asv_023_00172 | Bacillariophyta   | Attheya septentrionalis         | 1    | 0.8  | 0.89 | 1e-04   | ***  |
| > 20 $\mu\text{m}$ | MIZ+UI  | asv_023_00328 | Bacillariophyta   | Nitzschia sp.                   | 1    | 0.34 | 0.58 | 0.0166  | *    |



**Table 4:** (continued)

| Size fraction      | Sectors | ASVs          | Class            | Species                       | A    | B    | Stat | p.value | Sign |
|--------------------|---------|---------------|------------------|-------------------------------|------|------|------|---------|------|
| > 20 $\mu\text{m}$ | MIZ+UI  | asv_023_00184 | Bacillariophyta  | Pleurosigma intermedium       | 1    | 0.65 | 0.8  | 1e-04   | ***  |
| > 20 $\mu\text{m}$ | MIZ+UI  | asv_023_00219 | Bacillariophyta  | Bacillaria paxillifer         | 1    | 0.5  | 0.71 | 3e-04   | ***  |
| > 20 $\mu\text{m}$ | MIZ+UI  | asv_023_00268 | Bacillariophyta  | Stauroneis kriegeri           | 1    | 0.49 | 0.7  | 0.001   | ***  |
| > 20 $\mu\text{m}$ | MIZ+UI  | asv_023_00277 | Bacillariophyta  | Naviculales sp.               | 0.97 | 0.61 | 0.77 | 3e-04   | ***  |
| > 20 $\mu\text{m}$ | MIZ+UI  | asv_023_00308 | Bacillariophyta  | Synedra hyperborea            | 1    | 0.42 | 0.65 | 0.0033  | **   |
| > 20 $\mu\text{m}$ | MIZ+UI  | asv_023_00335 | Bacillariophyta  | Raphid-pennate X sp.          | 1    | 0.61 | 0.78 | 1e-04   | ***  |
| > 20 $\mu\text{m}$ | MIZ+OW  | asv_023_00001 | Prymnesiophyceae | Phaeocystis pouchetii         | 0.91 | 1    | 0.96 | 1e-04   | ***  |
| > 20 $\mu\text{m}$ | MIZ+OW  | asv_023_00013 | Bacillariophyta  | Thalassiosira rotula          | 0.96 | 0.96 | 0.96 | 1e-04   | ***  |
| > 20 $\mu\text{m}$ | MIZ+OW  | asv_023_00028 | Bacillariophyta  | Thalassiosira sp.             | 0.77 | 0.85 | 0.81 | 3e-04   | ***  |
| > 20 $\mu\text{m}$ | MIZ+OW  | asv_023_00057 | Bacillariophyta  | Thalassiosira sp.             | 0.93 | 0.9  | 0.92 | 1e-04   | ***  |
| > 20 $\mu\text{m}$ | MIZ+OW  | asv_023_00071 | Bacillariophyta  | Thalassiosira anguste-lineata | 0.97 | 0.71 | 0.83 | 1e-04   | ***  |
| > 20 $\mu\text{m}$ | MIZ+OW  | asv_023_00079 | Bacillariophyta  | Eucampia sp.                  | 0.94 | 0.9  | 0.92 | 1e-04   | ***  |
| > 20 $\mu\text{m}$ | MIZ+OW  | asv_023_00111 | Bacillariophyta  | Chaetoceros cinctus           | 0.89 | 0.81 | 0.85 | 1e-04   | ***  |
| > 20 $\mu\text{m}$ | MIZ+OW  | asv_023_00136 | Bacillariophyta  | Chaetoceros decipiens         | 0.87 | 0.79 | 0.83 | 1e-04   | ***  |
| > 20 $\mu\text{m}$ | MIZ+OW  | asv_023_00137 | Bacillariophyta  | Detonula confervacea          | 0.9  | 0.79 | 0.84 | 1e-04   | ***  |
| > 20 $\mu\text{m}$ | MIZ+OW  | asv_023_00177 | Bacillariophyta  | Chaetoceros rostratus         | 0.89 | 0.85 | 0.87 | 1e-04   | ***  |
| > 20 $\mu\text{m}$ | MIZ+OW  | asv_023_00218 | Bacillariophyta  | Chaetoceros danicus           | 0.92 | 0.73 | 0.82 | 1e-04   | ***  |

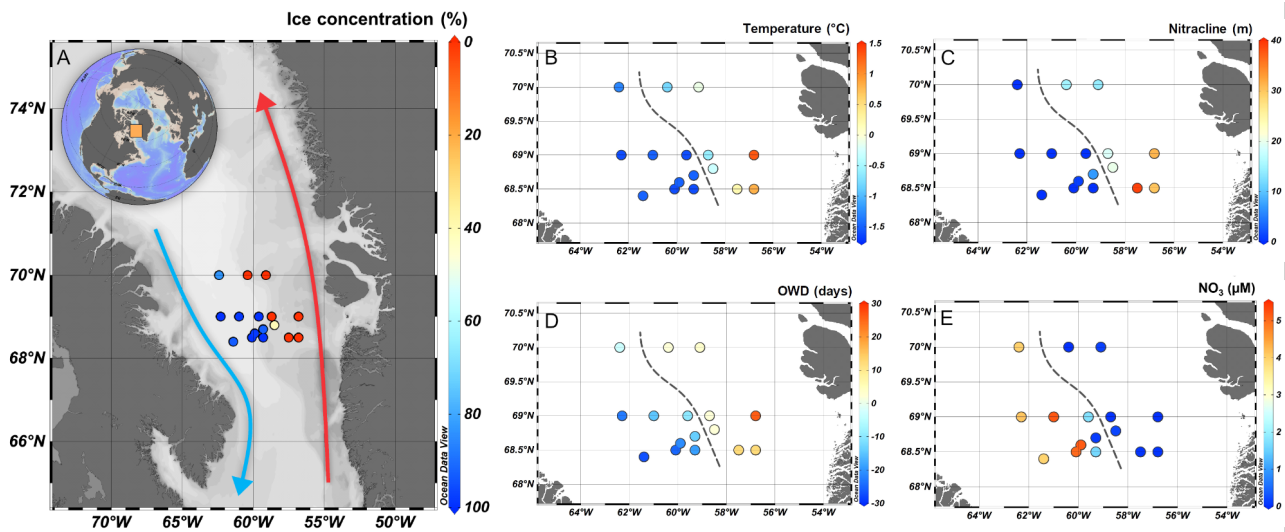

**Figure 1:** Location of the sampling stations in Baffin Bay and environmental variables. (A) Sampling stations indicating the sea-ice concentration (%); the red arrow represents the warmer West Greenland Current, and the blue arrow represents the Pacific-originated Baffin Current; (B) Temperature (°C) in surface; (C) Depth of the nitracline (meters); (D) Open Water Days: amount of days of open water before (positive values) or after (negative values) the sampling day; (E) Nitrate concentration in surface ( $\mu\text{M}$ ). A dashed line separates sampling stations with more (east) and less (west) than 80% sea-ice cover.

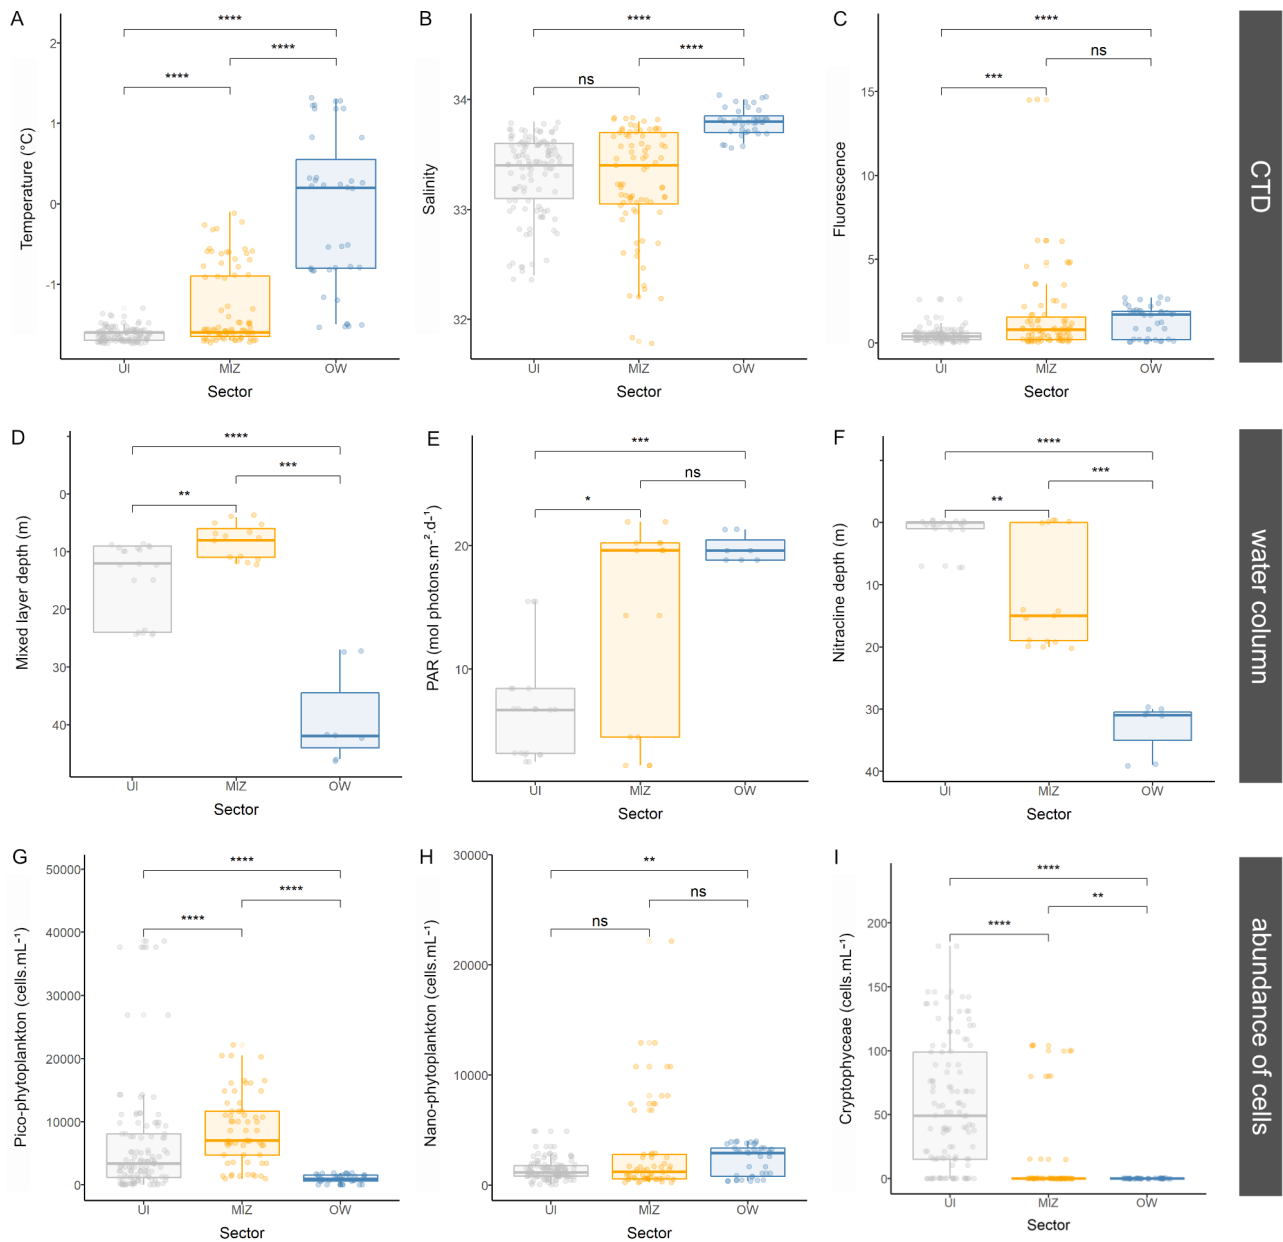

**Figure 2:** Environmental variables for the three sectors: UI (gray), MIZ (yellow) and OW (blue); (A) temperature ( $^{\circ}\text{C}$ ); (B) salinity; (C) fluorescence; (D) mixed layer depth (m); (E) Photosynthetically Active Radiation at 3 m ( $\text{mol photons.m}^{-2}.\text{d}^{-1}$ ); (F) nitracline depth (m); (G) pico-phytoplankton abundance ( $\text{cells.mL}^{-1}$ ); (H) nano-phytoplankton abundance ( $\text{cells.mL}^{-1}$ ); (I) Cryptophyceae abundance ( $\text{cells.mL}^{-1}$ ). Number of asterisks represent  $p$ -value obtained with the Wilcox test as follows: (\*)  $p \leq 0.05$ ; (\*\*)  $p \leq 0.01$ ; (\*\*\*)  $p \leq 0.001$ ; (\*\*\*\*)  $p \leq 0.0001$ ; “ns” = not significant.

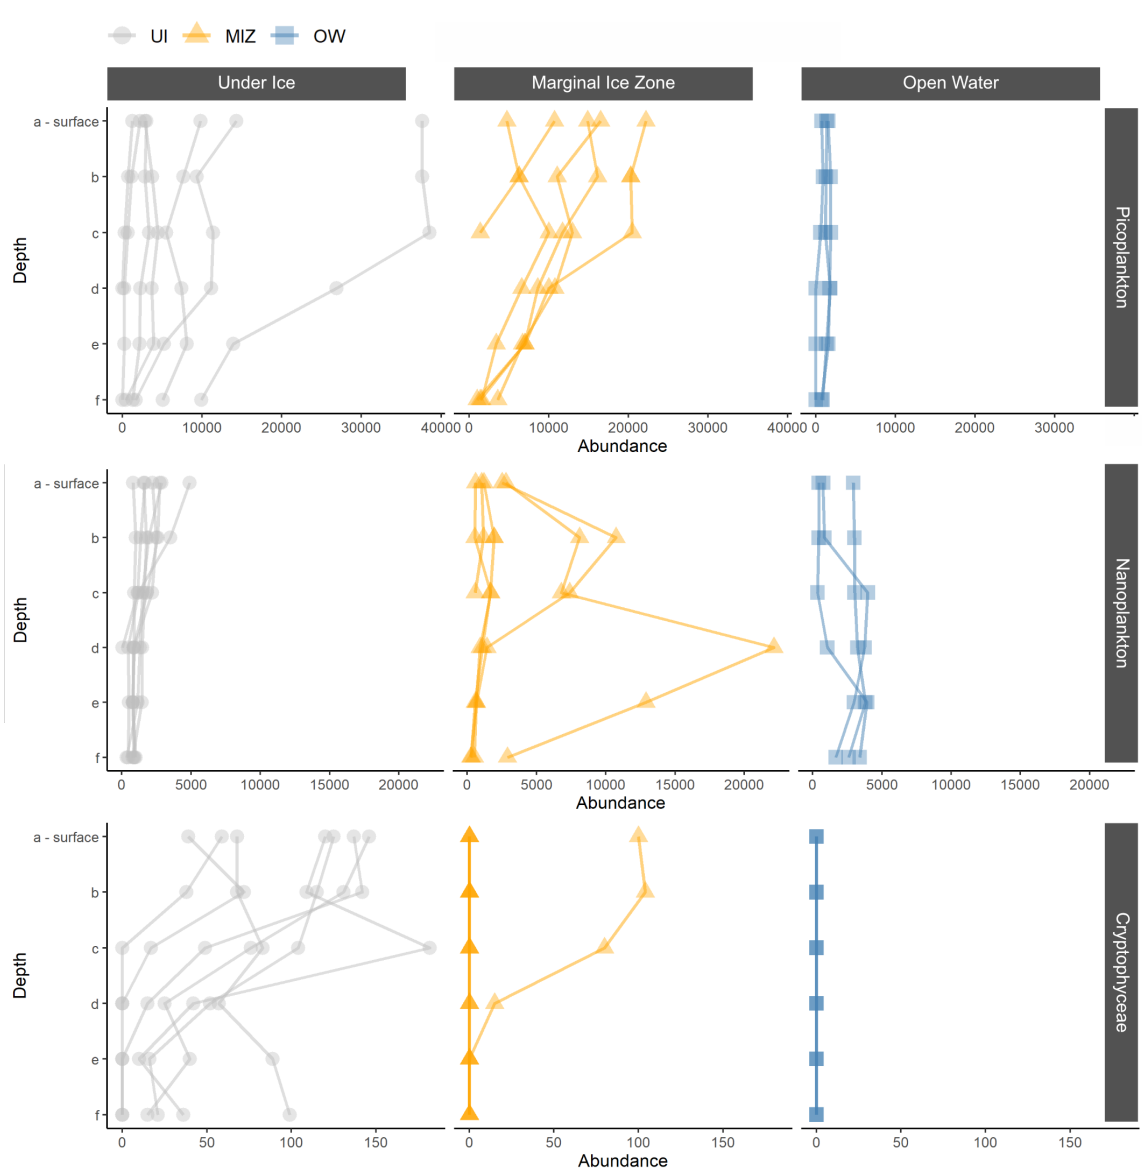

**Figure 3:** Abundance (cells.mL<sup>-1</sup>) measured by FCM of pico-phytoplankton (top panels), nano-phytoplankton (middle panels) and Cryptophyceae (lower panels) according to depth, divided between the three sectors: UI (gray), MIZ (yellow) and OW (blue).

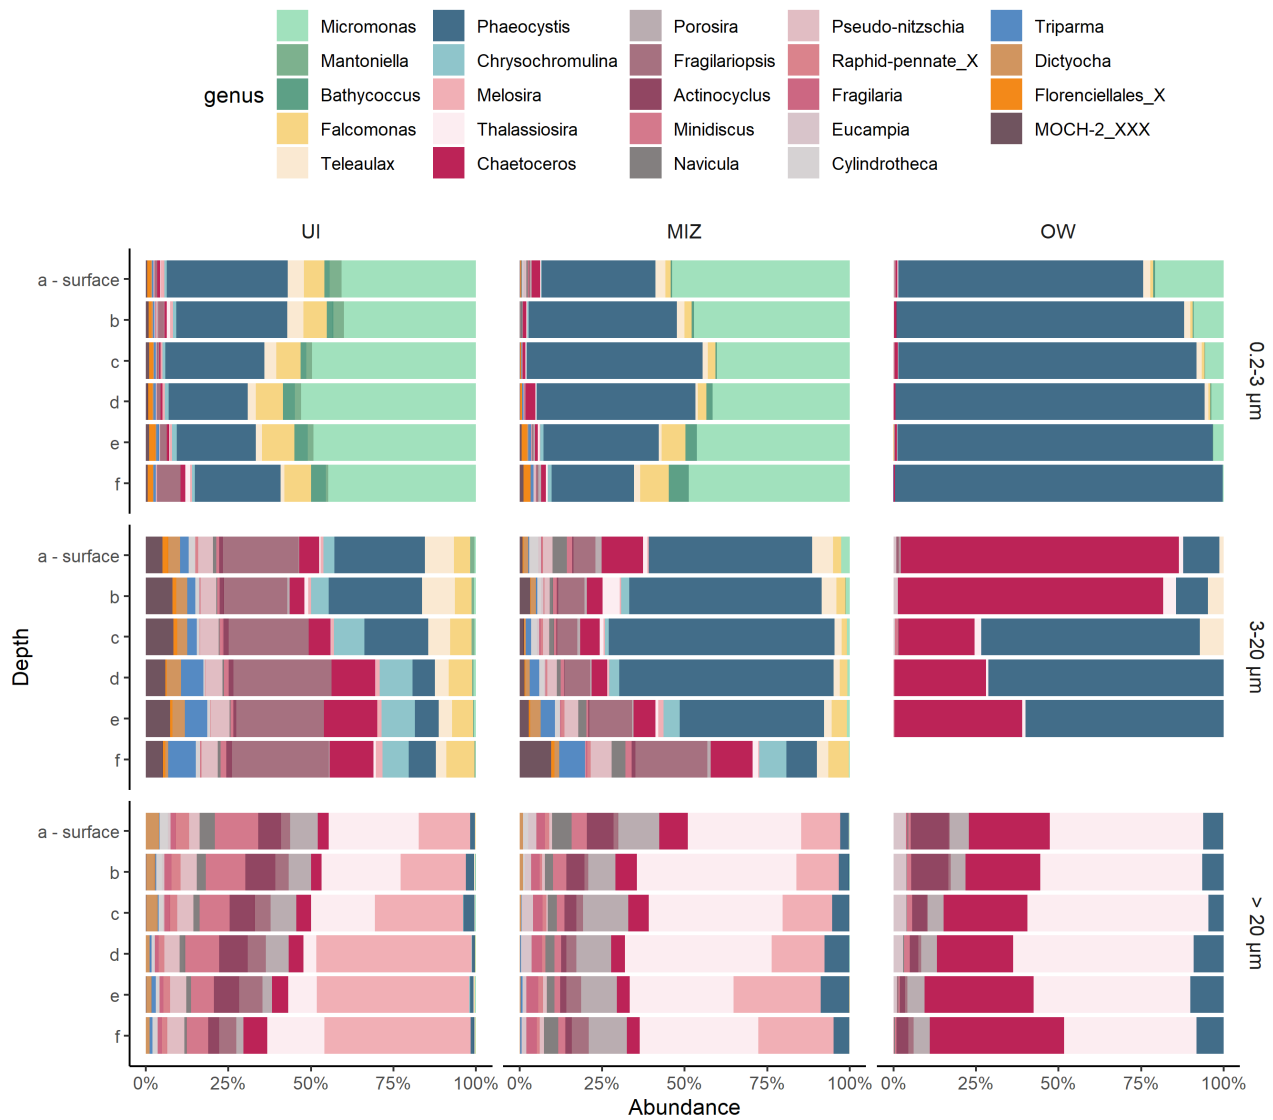

**Figure 4:** Relative abundance of reads at the genus level between sectors and size fractions. UI: Under Ice; MIZ: Marginal Ice Zone; OW: Open Water; letters on the y-axis refer to the depth level where “a” corresponds to the surface and “f” to the deepest sample depth, usually between 40 m and 60 m depth.

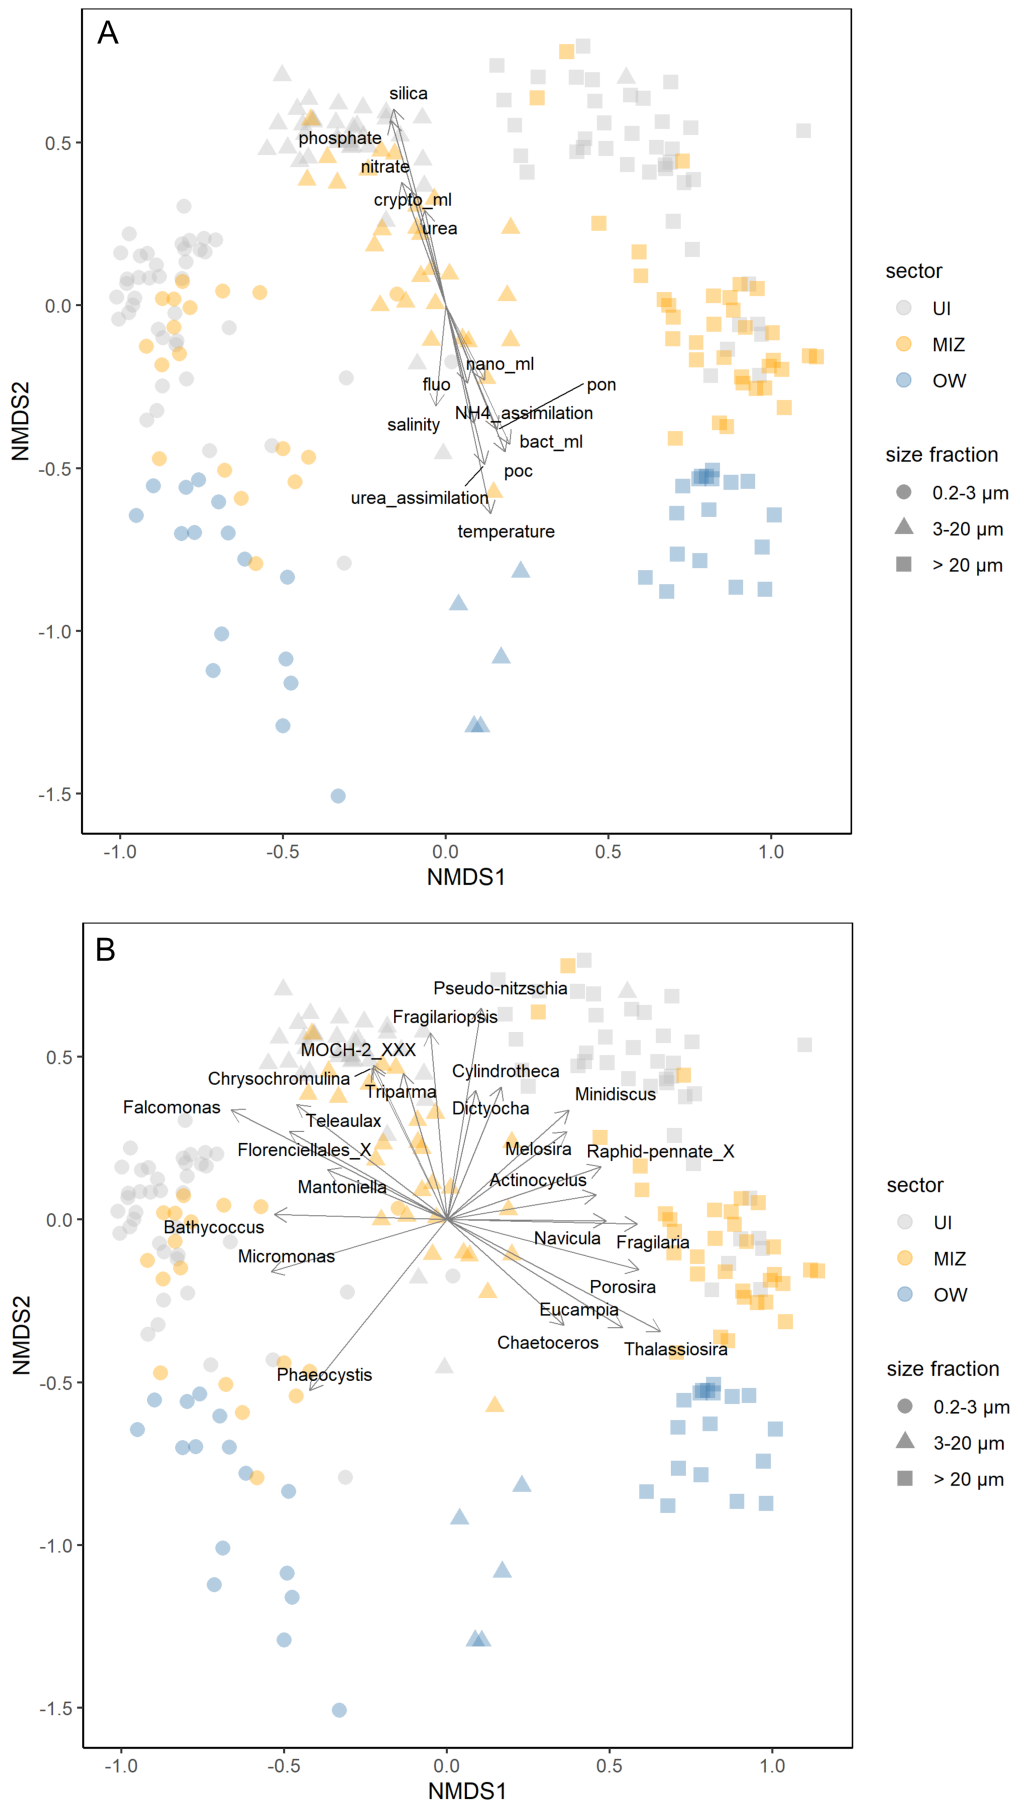

**Figure 5:** Non-metric multidimensional scaling (NMDS) analysis using Bray-Curtis dissimilarities of the phytoplankton community composition; only statistically significant (A) environmental parameters ( $p$ -value = 0.001) and (B) genera ( $p$ -value = 0.05) were plotted against ordination. Parameters: ammonium assimilation (NH<sub>4</sub> assimilation), bacteria abundance (bact\_ml), Cryptophyceae abundance (crypto\_ml), fluorescence (fluo), nano-phytoplankton abundance (nano\_ml), nitrates, silica, particulate organic carbon (poc), particulate organic nitrogen (pon), phosphate, salinity, temperature, urea, and urea assimilation (urea\_assimilation). Stress: 0.11.

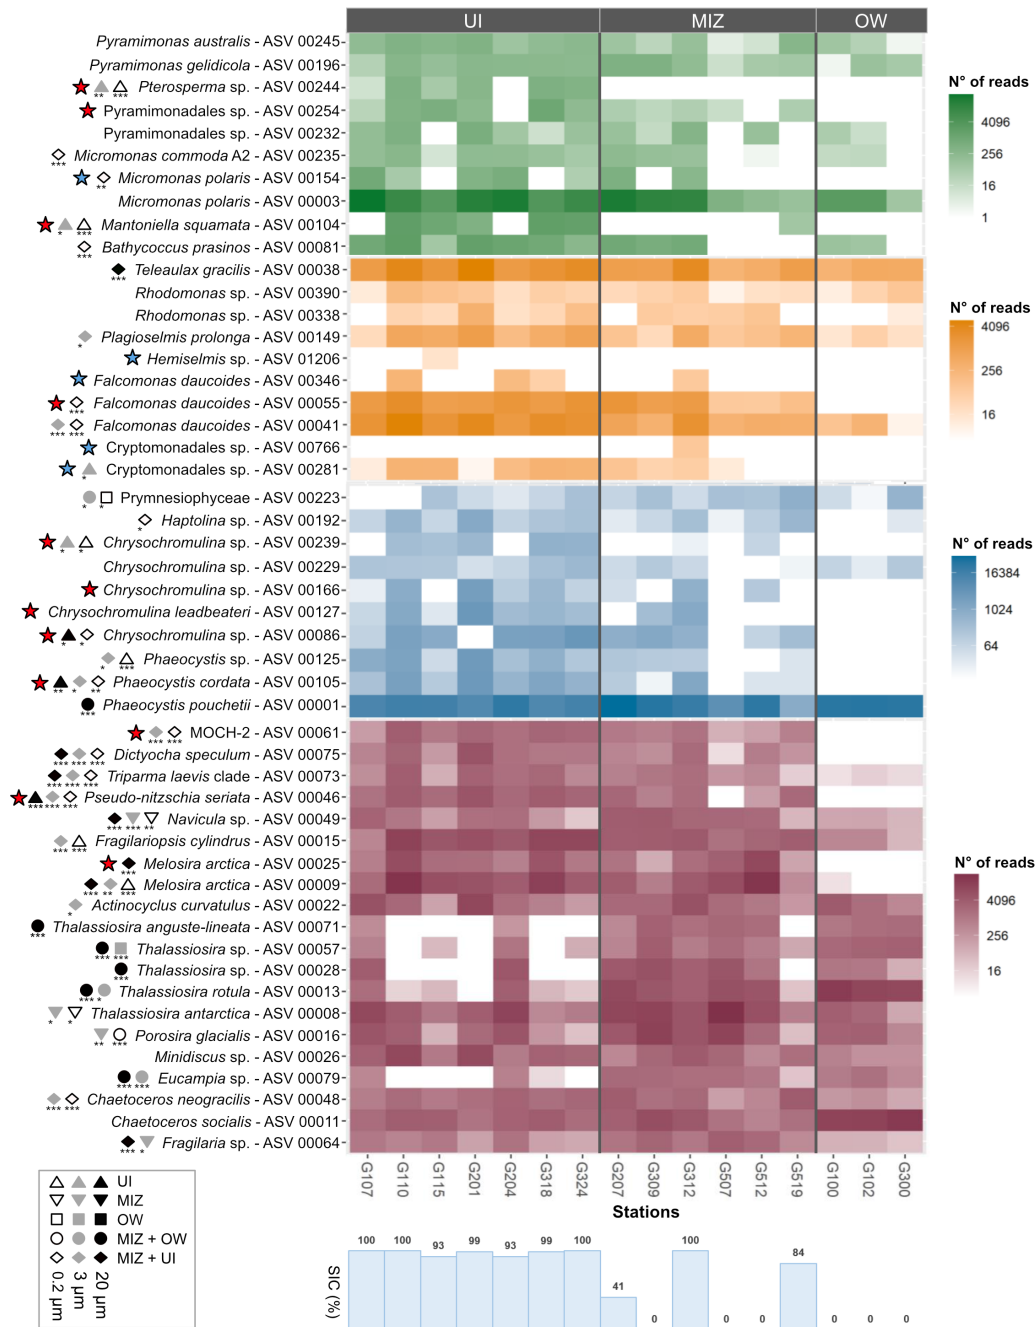

**Figure 6:** Taxa distribution of the most abundant ASVs for each sector, divided by sampling stations; the top 10 ASVs were selected within Chlorophyta (green), Cryptophyta (orange), Haptophyta (blue), and the top 20 most abundant within the highly diverse Ochrophyta division (red); symbols indicate if a given ASV was reported as indicator ASV for UI (triangles), MIZ (inverted triangles), OW (squares), MIZ+UI (diamonds) or MIZ+OW (circles) sector groups within 0.2-3 μm (white), 3-20 μm (grey) or > 20 μm (black) size fractions; asterisks indicate the p-values associated with the indicator ASV: 0 (\*\*\*) for UI, 0.001 (\*\*), and 0.01 (\*) for OW; red and blue stars indicate if a given ASV was found exclusively in ice-associated sectors, being blue stars not abundant ASVs; SIC = sea-ice concentration on each sampling station.

# Arctic phytoplankton spring bloom diversity across the marginal ice zone in Baffin Bay

1043 Catherine G erikas Ribeiro <sup>1+\*</sup>

1044 Adriana Lopes dos Santos <sup>2+</sup>

1045 Nicole Trefault <sup>1</sup>

1046 Dominique Marie <sup>3</sup>

1047 Connie Lovejoy <sup>4</sup>

1048 Daniel Vaultot <sup>3,2</sup>

1049 <sup>1</sup> GEMA Center for Genomics, Ecology & Environment, Universidad Mayor, Camino La Pir mide, 5750,  
1050 Huechuraba, Santiago, 8580745, Chile

1051 <sup>2</sup> Asian School of the Environment, Nanyang Technological University, 50 Nanyang Avenue, Singapore, 639798,  
1052 Singapore.

1053 <sup>3</sup> Sorbonne Universit , CNRS, UMR7144, Team ECOMAP, Station Biologique de Roscoff, Roscoff, 29680,  
1054 France

1055 <sup>4</sup> D partement de Biologie, Institut de Biologie Int grative et des Syst mes, Universit  Laval, Quebec, QC  
1056 G1R1V6, Canada

1057 <sup>+</sup> These two authors contributed equally to the paper

1058 <sup>\*</sup> Corresponding author: [catherine.gerikas@gmail.com](mailto:catherine.gerikas@gmail.com)

1059 Keywords: phytoplankton, microbial eukaryotes, Arctic Ocean, high throughput amplicon sequencing

1060 Date: March 14, 2022

## 1061 Supplementary material

1062 All supplementary material is available at [https://github.com/catherine-gerikas/GE\\_Amundsen\\_18S\\_metaB\\_](https://github.com/catherine-gerikas/GE_Amundsen_18S_metaB_supplementary_material)  
1063 [supplementary\\_material](https://github.com/catherine-gerikas/GE_Amundsen_18S_metaB_supplementary_material)



1064 **Supplementary Data**

1065 Supplementary Data S1: Sample dates and environmental data available.

1066 Available in: [https://github.com/catherine-gerikas/GE\\_Amundsen\\_18S\\_metaB\\_supplementary\\_material](https://github.com/catherine-gerikas/GE_Amundsen_18S_metaB_supplementary_material)

## Supplementary Tables

**Table S1:** List of variables measured during the Green Edge cruise (see Data Set S1).

| Variable                  | Description                                         | Unit                                         |
|---------------------------|-----------------------------------------------------|----------------------------------------------|
| sample_code               | sample code                                         |                                              |
| fraction_name             | size fraction                                       |                                              |
| station_id                | station ID                                          |                                              |
| CTD                       | ID of CTD cast                                      |                                              |
| transect                  | cruise transect ID                                  |                                              |
| bot_depth                 | bottom depth at a given station                     | m                                            |
| depth                     | depth on each the sample was taken                  | m                                            |
| depth_rank                | rank of sampling depth in the water column          |                                              |
| sampling_date             | sampling date                                       |                                              |
| julian_day                | julian day                                          |                                              |
| longitude                 | longitude coordinates                               | degrees east                                 |
| latitude                  | latitude coordinates                                | degrees north                                |
| OWD                       | days a given station was ice-free                   | days                                         |
| by_OW_minus10_10          | classification of sectors based in OWD              | sector                                       |
| ice_concentration_percent | ice concentration cover                             | %                                            |
| dna_concentration         | dna concentration                                   | ng. $\mu$ L <sup>-1</sup>                    |
| dna_extraction_kit        | dna extraction kit                                  |                                              |
| n_reads                   | number of reads after filtering                     |                                              |
| reads_total               | number of reads obtained from sequencing            |                                              |
| pico_ml                   | pico-phytoplankton abundance                        | cells.mL <sup>-1</sup>                       |
| nano_ml                   | nano-phytoplankton abundance                        | cells.mL <sup>-1</sup>                       |
| pico_and_nano_ml          | pico- and nano phytoplankton abundance              | cells.mL <sup>-1</sup>                       |
| crypto_ml                 | cryptophyceae abundance                             | cells.mL <sup>-1</sup>                       |
| bact                      | bacteria abundance                                  | cells.mL <sup>-1</sup>                       |
| temperature               | temperature                                         | degrees Celsius                              |
| fluo                      | fluorescence                                        |                                              |
| cdom                      | colored dissolved organic matter                    | (ppb)                                        |
| salinity                  | salinity                                            |                                              |
| mixed_layer_depth         | mixed layer depth                                   | m                                            |
| nitracline_depth          | nitracline depth                                    | m                                            |
| PAR_irradiance            | photosynthetically available radiation at 3 m depth | mol photons.m <sup>-2</sup> .d <sup>-1</sup> |

**Table S1:** (continued)

| Variable                   | Description                                     | Unit                                  |
|----------------------------|-------------------------------------------------|---------------------------------------|
| primary_production         | primary production                              | $\mu\text{gC.L}^{-1}.\text{day}^{-1}$ |
| primary_production_std_dev | primary production standard deviation           | $\mu\text{gC.L}^{-1}.\text{day}^{-1}$ |
| don_release                | dissolved organic nitrogen                      | $\text{nM.L}^{-1}.\text{day}^{-1}$    |
| NO3_assimilation           | nitrate assimilation                            | $\text{nM.L}^{-1}.\text{day}^{-1}$    |
| NH4_assimilation           | ammonium assimilation                           | $\text{nM.L}^{-1}.\text{day}^{-1}$    |
| urea_assimilation          | urea assimilation                               | $\text{nM.L}^{-1}.\text{day}^{-1}$    |
| NH4_regeneration           | ammonium regeneration                           | $\text{nM.L}^{-1}.\text{day}^{-1}$    |
| nitrification              | nitrification                                   | $\text{nM.L}^{-1}.\text{day}^{-1}$    |
| poc                        | particulate organic carbon                      | $\mu\text{M}$                         |
| poc_std_dev                | particulate organic carbon standard deviation   | $\mu\text{M}$                         |
| pon                        | particulate organic nitrogen                    | $\mu\text{M}$                         |
| pon_std_dev                | particulate organic nitrogen standard deviation | $\mu\text{M}$                         |
| doc                        | dissolved organic carbon                        | $\mu\text{M}$                         |
| don                        | dissolved organic nitrogen                      | $\mu\text{M}$                         |
| nitrate                    | nitrate concentration                           | $\mu\text{M}$                         |
| nitrite                    | nitrite concentration                           | $\mu\text{M}$                         |
| phosphate                  | phosphate concentration                         | $\mu\text{M}$                         |
| silica                     | orthosilicic acid concentration                 | $\mu\text{M}$                         |
| ammonium                   | ammonium concentration                          | $\mu\text{M}$                         |
| urea                       | urea concentration                              | $\mu\text{M}$                         |
| ratio_NO3_SiOH4            | ratio nitrate to silica                         |                                       |
| ratio_PO4_NO3              | ratio phosphate to nitrate                      |                                       |
| ratio_NO3_PO4              | ratio nitrate to phosphate                      |                                       |
| chlorophyll_a              | chlorophyll a concentration                     | $\text{mg.m}^{-3}$                    |
| chlorophyll_b              | chlorophyll b concentration                     | $\text{mg.m}^{-3}$                    |

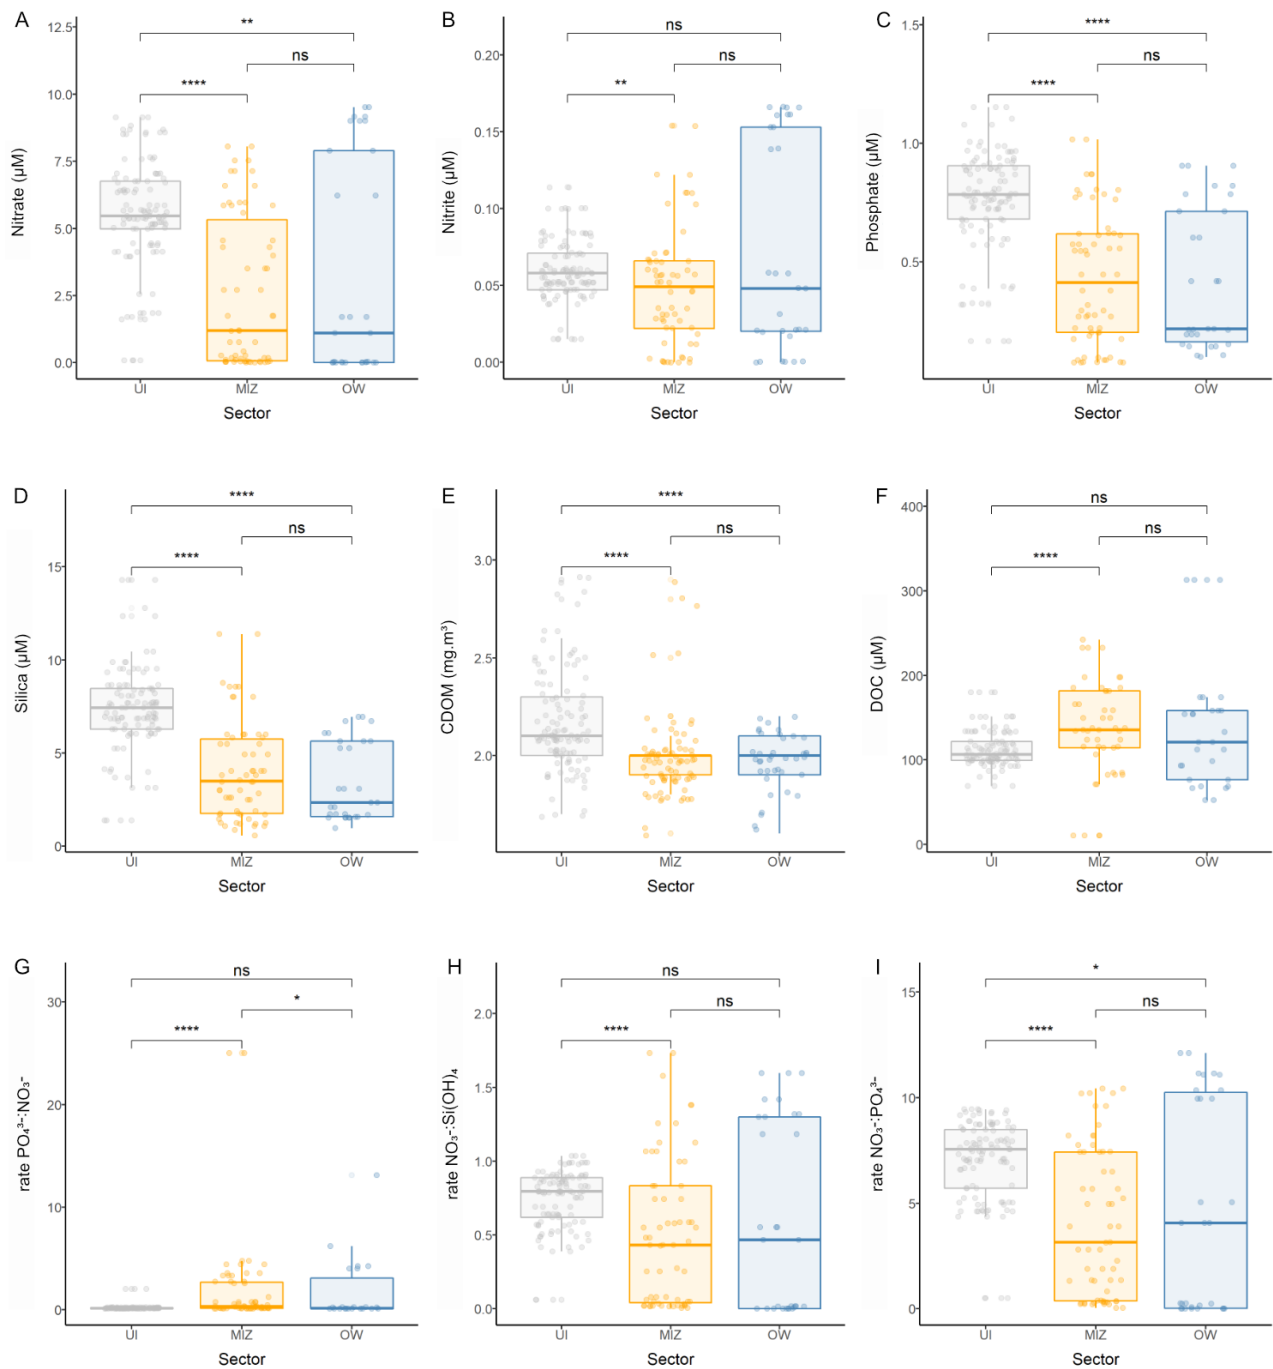

**Figure S1:** Nutrients for the three sectors: UI (grey), MIZ (yellow) and OW (blue); (A) nitrates ( $\mu\text{M}$ ); (B) nitrites ( $\mu\text{M}$ ); (C) phosphates ( $\mu\text{M}$ ); (D) orthosilicic acid ( $\mu\text{M}$ ); (E) colored dissolved organic matter ( $\text{mg}\cdot\text{m}^{-3}$ ); (F) dissolved organic carbon ( $\mu\text{M}$ ); (G) phosphate to nitrate ratio; (H) nitrate to orthosilicic acid ratio; (I) nitrate to phosphate ratio. Number of asterisks represent  $p$ -value obtained with the Wilcox test as follows: (\*)  $p \leq 0.05$ ; (\*\*)  $p \leq 0.01$ ; (\*\*\*)  $p \leq 0.001$ ; (\*\*\*\*)  $p \leq 0.0001$ ; “ns” = not significant.

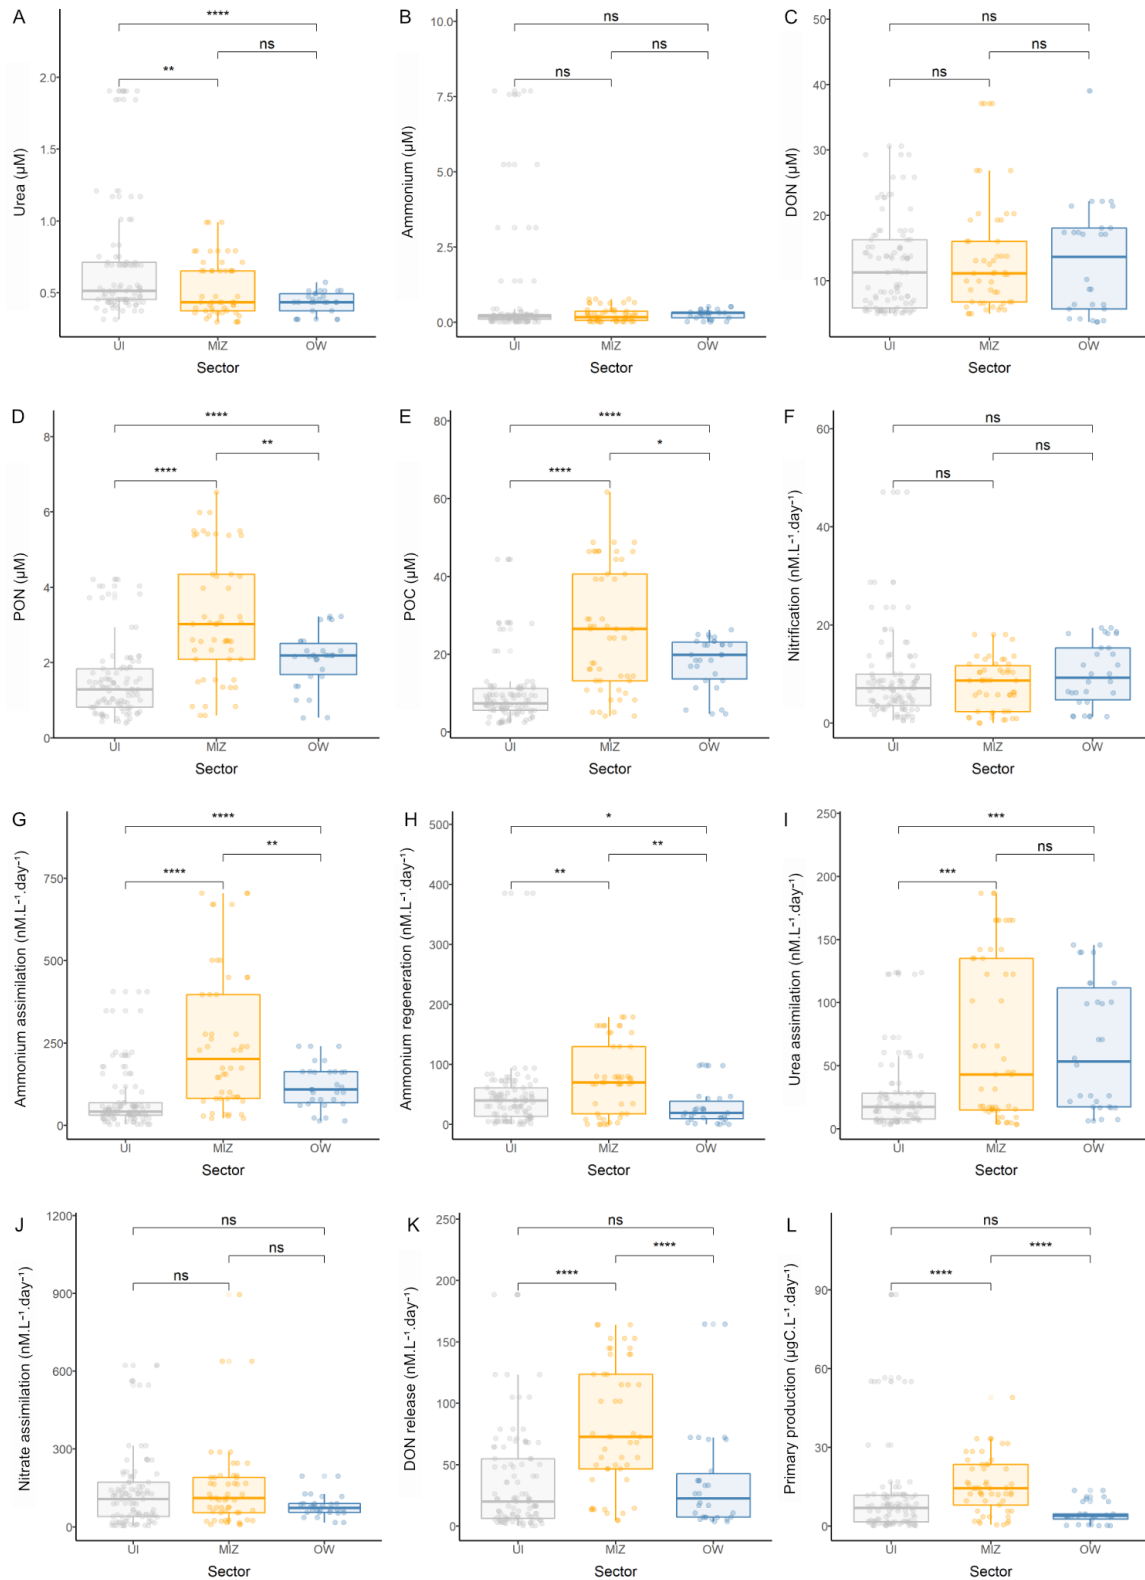

**Figure S2:** Nutrients and metabolic rates for the three sectors: UI (grey), MIZ (yellow) and OW (blue); (A) urea ( $\mu\text{M}$ ); (B) ammonium ( $\mu\text{M}$ ); (C) dissolved organic nitrogen ( $\mu\text{M}$ ); (D) particulate organic nitrogen ( $\mu\text{M}$ ); (E) particulate organic carbon ( $\text{mg.m}^{-3}$ ); (F) nitrification ( $\mu\text{M}$ ); (G) ammonium assimilation ( $\text{nM.L}^{-1}.\text{day}^{-1}$ ); (H) ammonium regeneration ( $\text{nM.L}^{-1}.\text{day}^{-1}$ ); (I) urea assimilation ( $\text{nM.L}^{-1}.\text{day}^{-1}$ ); (J) nitrate assimilation; (K) dissolved organic nitrogen ( $\mu\text{M}$ ); (L) primary production ( $\mu\text{gC.L}^{-1}.\text{day}^{-1}$ ). Number of asterisks represent  $p$ -value obtained with the Wilcox test as follows: (\*)  $p \leq 0.05$ ; (\*\*)  $p \leq 0.01$ ; (\*\*\*)  $p \leq 0.001$ ; (\*\*\*\*)  $p \leq 0.0001$ ; “ns” = not significant.

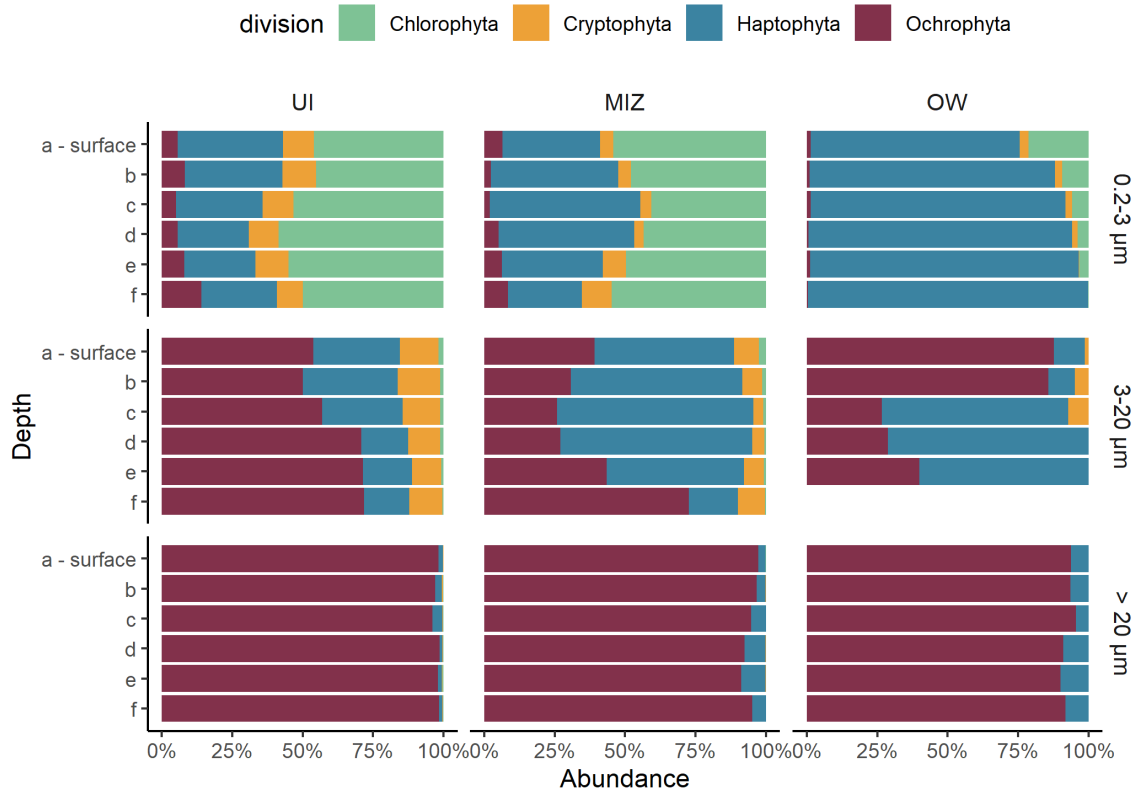

**Figure S3:** Relative abundance of reads at the division level between sectors and size fractions. UI: Under Ice; MIZ: Marginal Ice Zone; OW: Open Water; letters on the y-axis refer to the depth level where “a” corresponds to the surface and “f” to the deepest sampled depth, usually between 40 m and 60 m.

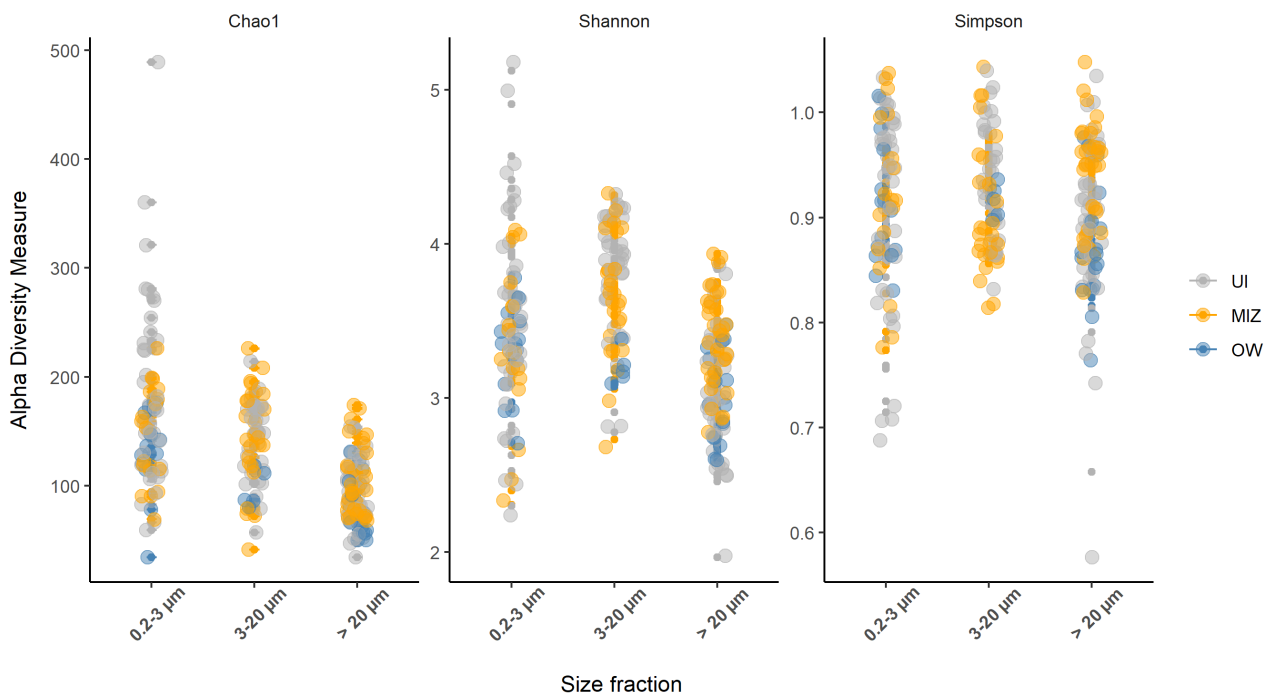

**Figure S4:** Chao1, Shannon and Simpson alpha diversity indices divided by size fraction; sectors are represented by the colors grey (UI), yellow (MIZ) and blue (OW).

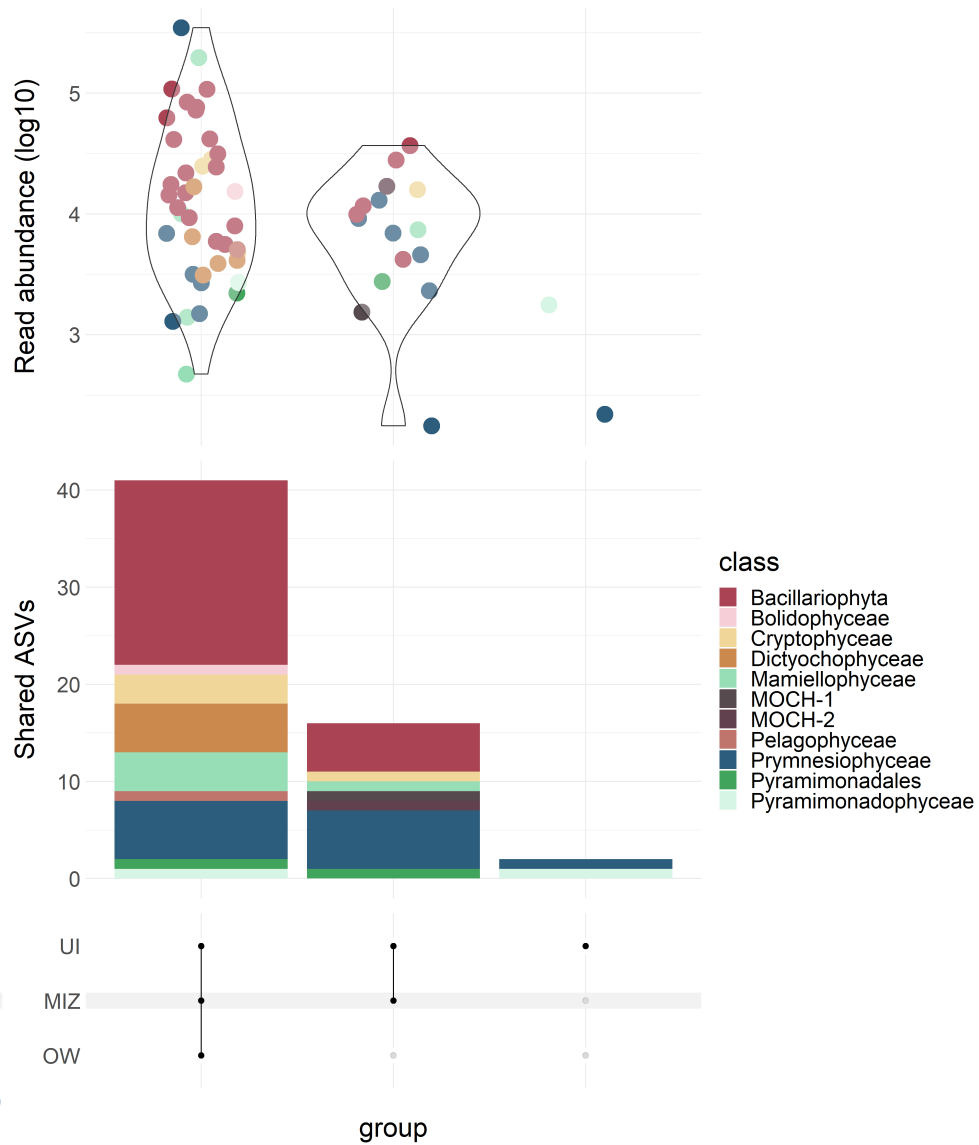

**Figure S5:** Number of ASVs from the abundant community exclusive from or shared between the sectors UI (under ice), MIZ (marginal ice-zone), and OW (open water); colors represent the class from each ASV; read abundance (in log10) is displayed at the top of each intersection; the names and assignments of the ASVs exclusive from ice-associated sectors are shown in grey panels.

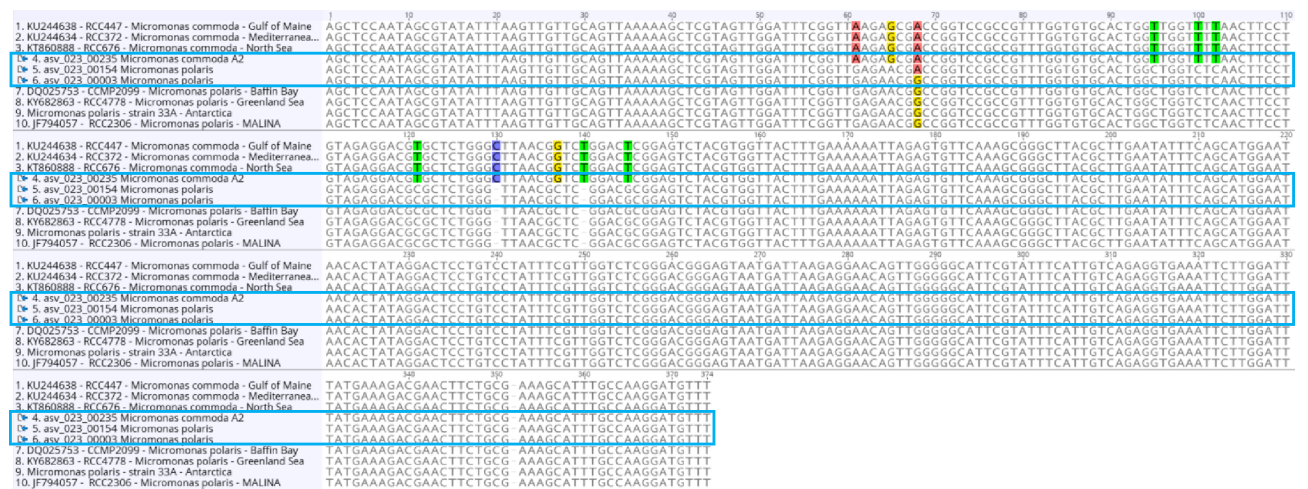

**Figure S6:** Sequence alignment of the 18S rRNA of *Micromonas* ASVs showing two *M. polaris* ASVs with a single nucleotide difference, and a *M. commoda* A2 ASV.

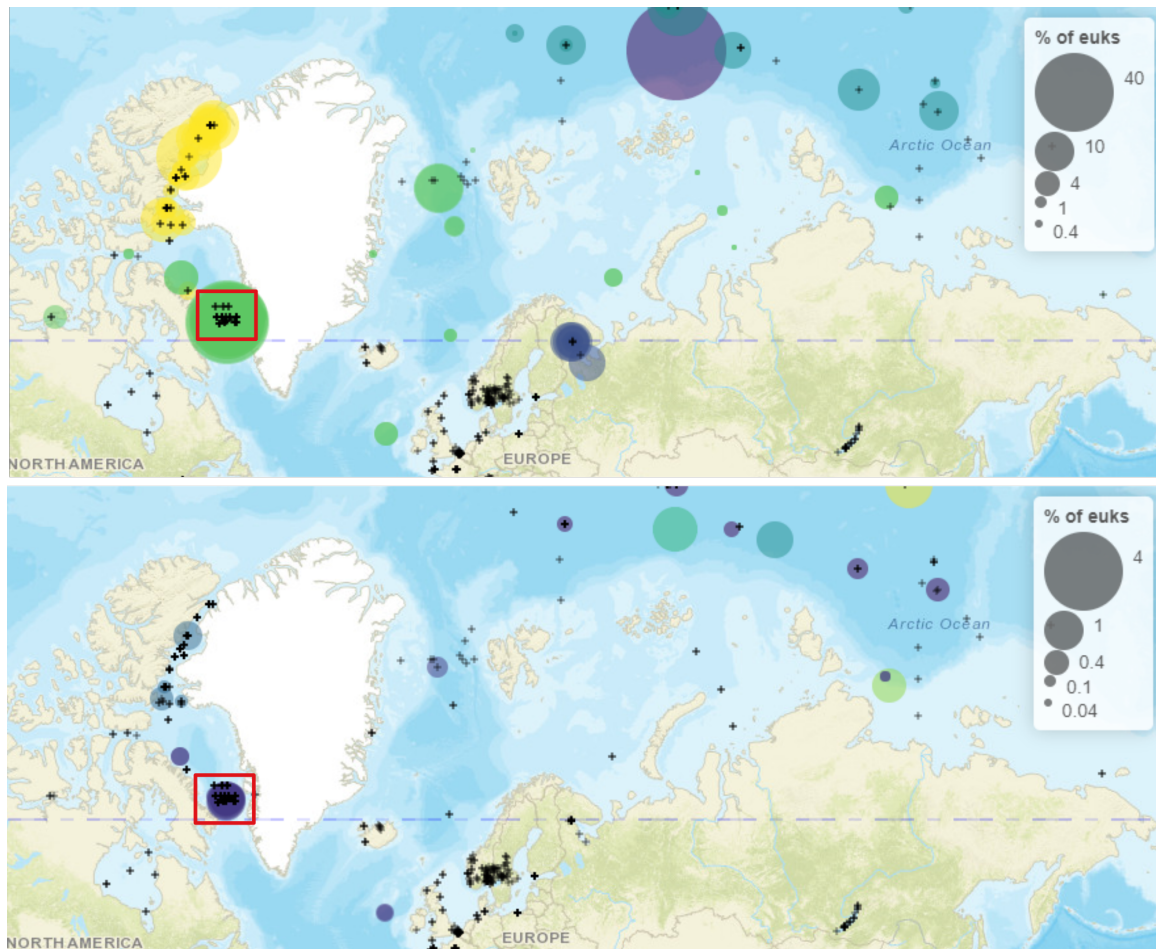

**Figure S7:** Partial snapshot of *M. polaris* ASV\_0003 (top panel) and ASV\_0154 (lower panel) distribution in the metaPR<sup>2</sup> database showing 100% similar reads from other studies. Colors indicate different sampling campaigns within metaPR<sup>2</sup>. Size of bubbles represent the percentage in relation to other eukaryotes within each station. Note that maximum percentages are distinct between panels to compensate for the lower abundance of ASV\_0154.



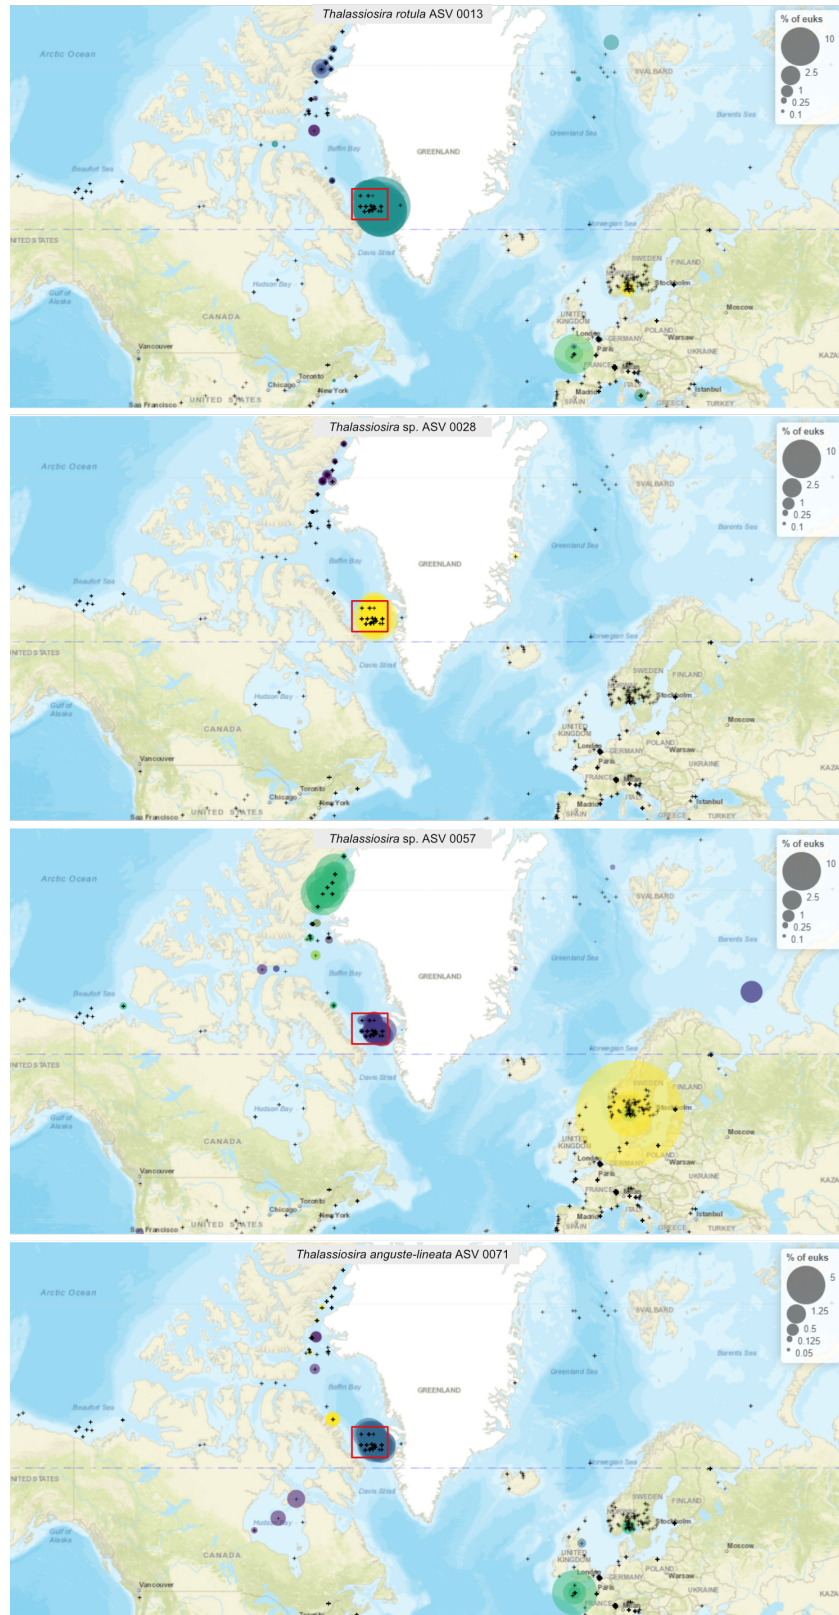

**Figure S8:** Partial snapshot of *Thalassiosira* ASV\_0013 (top panel), ASV\_0057 (middle panel), and ASV\_0071 (lower panel) distribution in the metaPR<sup>2</sup> database showing 100% similar reads from other studies. Colors indicate different sampling campaigns within metaPR<sup>2</sup>. Size of bubbles represent the percentage in relation to other eukaryotes within each station. Note that maximum percentages are distinct between panels. The approximate region of sampling from the present study is marked by a red square.
